# Supplementary material for: Synthesis of 4,4′-(4-Formyl-1H-pyrazole-1,3-diyl)dibenzoic Acid Derivatives as Narrow Spectrum Antibiotics for the Potential Treatment of Acinetobacter Baumannii Infections
Source: PubMed Central journal article supplement (PMC7601628; doi:10.3390/antibiotics9100650), 2020-09-28

# Synthesis of 4,4'-(4-Formyl-1H-pyrazole-1,3-diyl)dibenzoic Acid Derivatives as Narrow Spectrum Antibiotics for Potential Treatment of *Acinetobacter baumannii* Infections

Delancey,<sup>a</sup> E; Allison,<sup>a</sup> D.; Raj<sup>a</sup>, H. K.C.; Gilmore,<sup>b</sup> D. F.; Fite,<sup>c,d</sup> T.; Basnakian,<sup>c,d</sup> A.G.; Alam<sup>\*a</sup>, M. A.

✉ Mohammad A. Alam

[malam@astate.edu](mailto:malam@astate.edu)

<sup>a</sup> Department of Chemistry and Physics, College of Science and Mathematics, Arkansas State University, Jonesboro, AR 72467

<sup>b</sup> Department of Biological Sciences, College of Science and Mathematics, Arkansas State University, Jonesboro, AR 72467

<sup>c</sup> Department of Pharmacology and Toxicology, University of Arkansas for Medical Sciences, 4301 W. Markham St., Little Rock, AR 72205

<sup>d</sup> Central Arkansas Veterans Healthcare System, W. 7<sup>th</sup> St., Little Rock, AR 72205

## 4,4'-(4-formyl-1H-pyrazole-1,3-diyl)dibenzoic acid (**4**)

Yellow solid (3.02g 90%). <sup>1</sup>H NMR, 300 MHz (DMSO-d<sub>6</sub>): δ 9.99 (s, 1H), 9.41 (s, 1H), 8.09-8.05 (m, 8H); <sup>13</sup>C NMR (75MHz, DMSO-d<sub>6</sub>) δ = 189.6, 172.1, 171.6, 156.9, 146.5, 141.1, 140.2, 136.1, 134.6, 133.9, 127.9, 124.0.

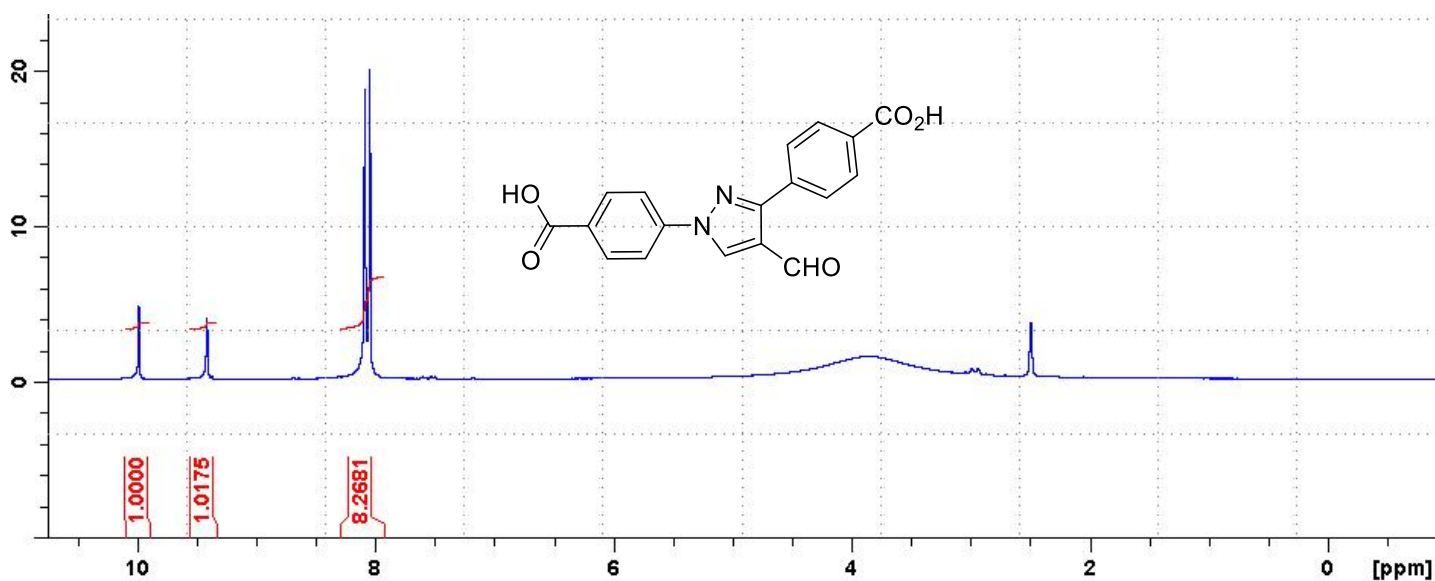

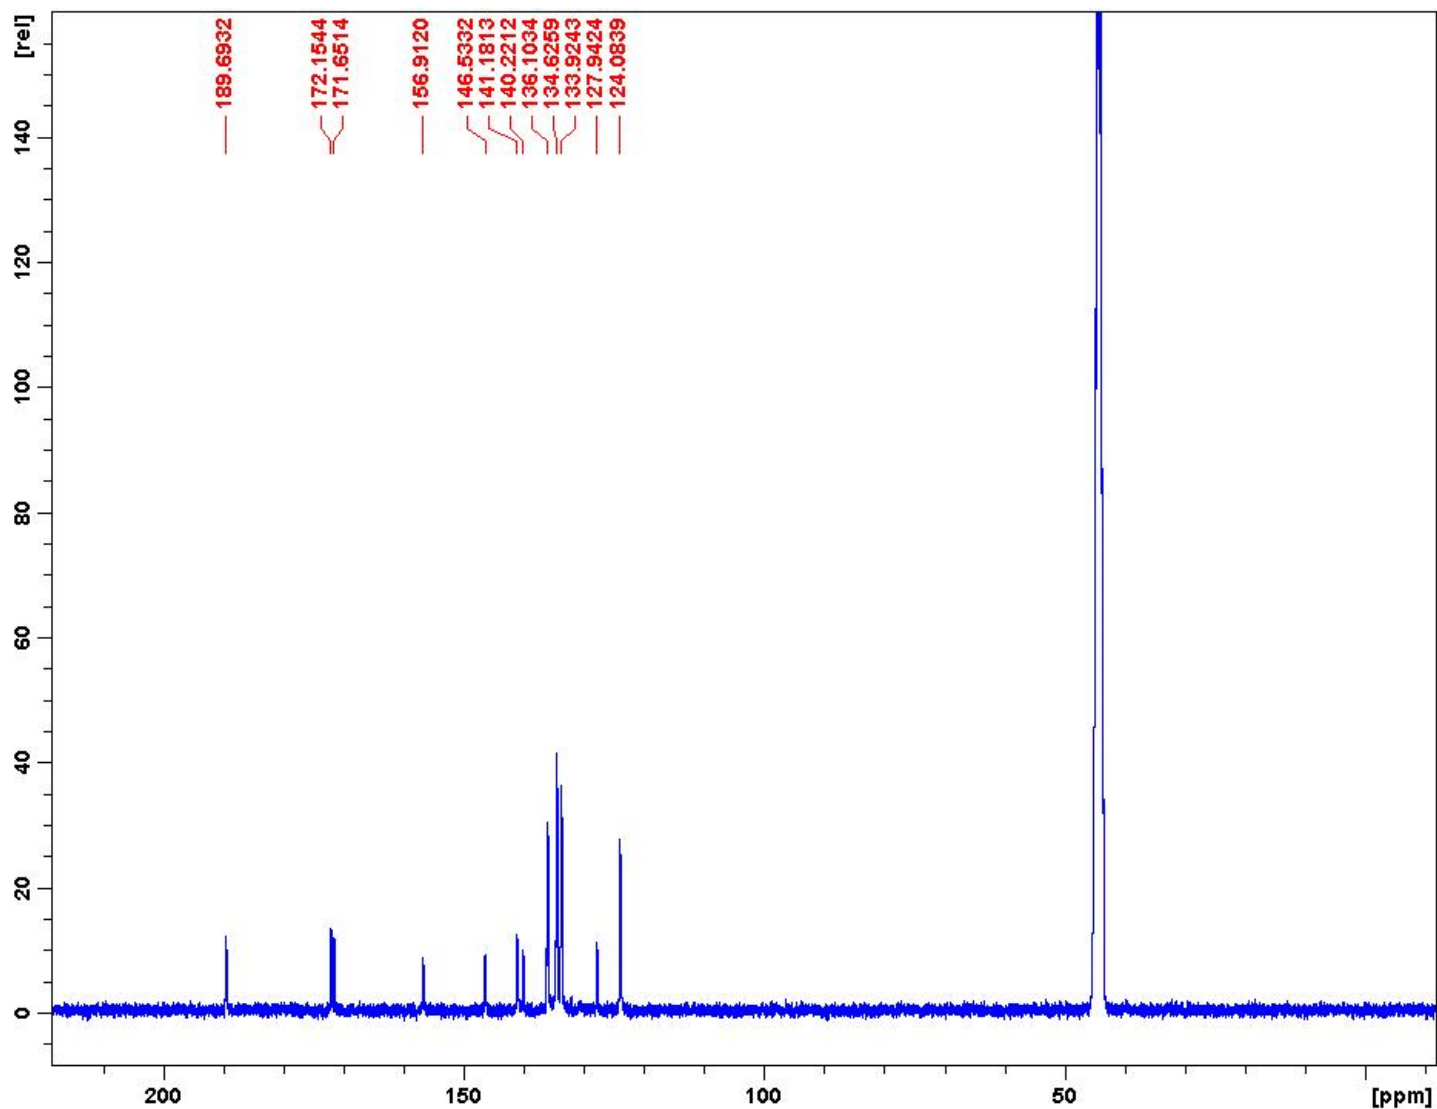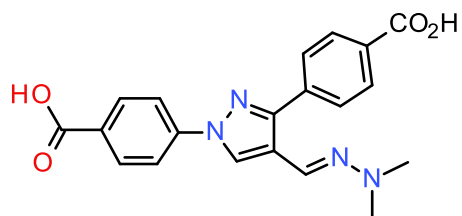

**4-[1-(4-carboxyphenyl)-4-[(E)-(dimethylhydrazono)methyl]pyrazol-3-yl]benzoic acid (5)**

Yellow solid (347 mg, 92%). <sup>1</sup>H NMR (300 MHz DMSO-d<sub>6</sub>): 8.77 (s, 1H), 8.11-8.04 (m, 6H), 7.90 (d, J = 8.2 Hz, 2H), 7.29 (s, 1H), 2.88 (s, 6H); <sup>13</sup>C NMR (75 MHz DMSO-d<sub>6</sub>): 167.5, 167.1, 149.9, 142.5, 137.2, 131.3, 130.7, 130.1, 128.8, 128.5, 126.4, 124.2, 120.9, 118.4, 42.8.

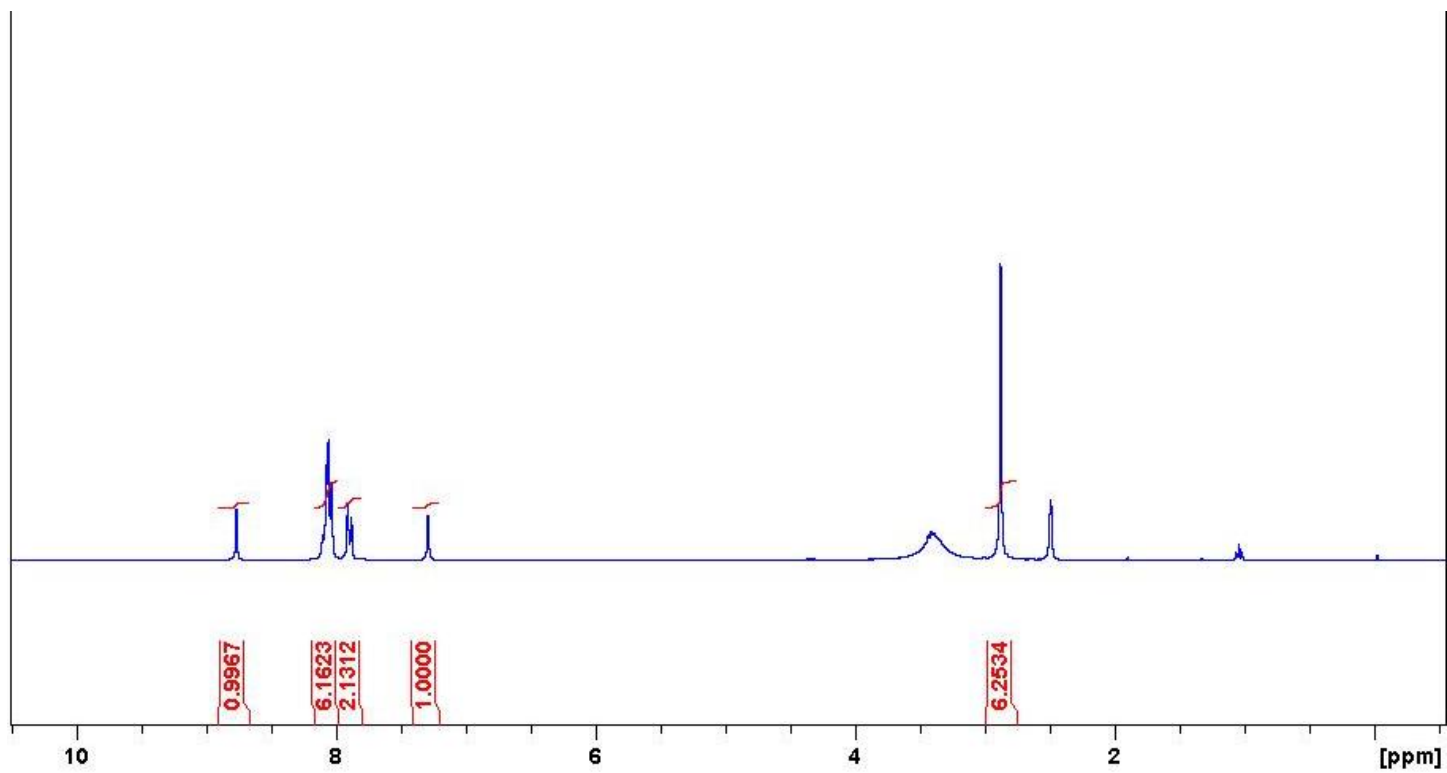

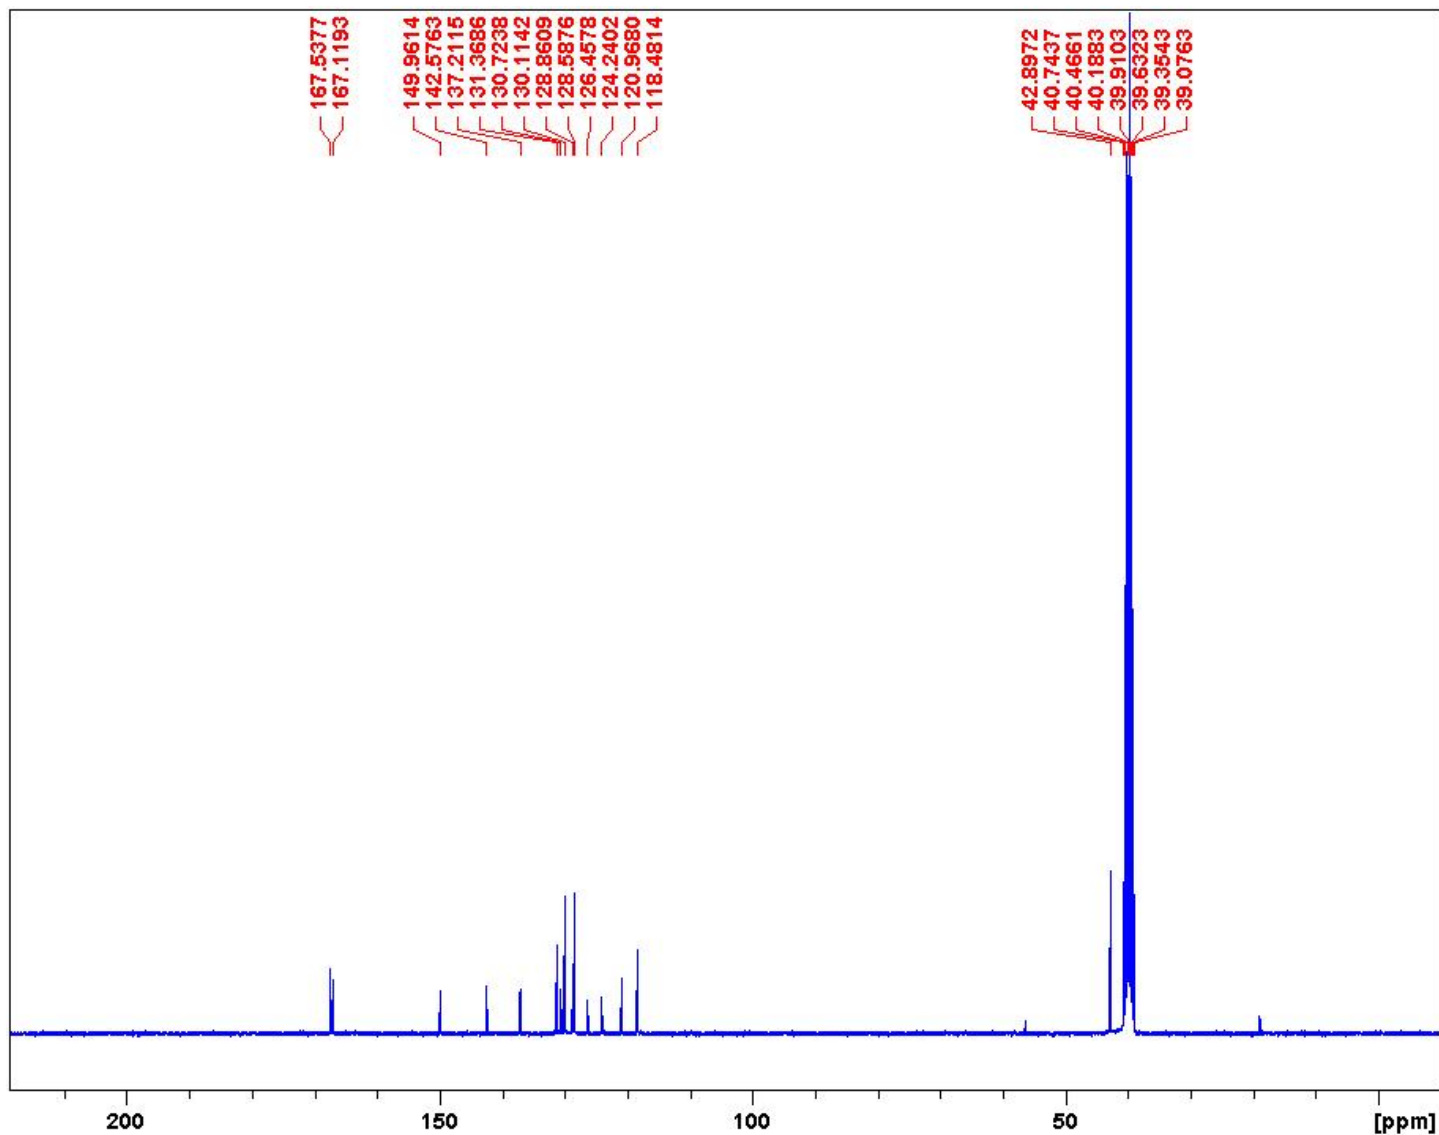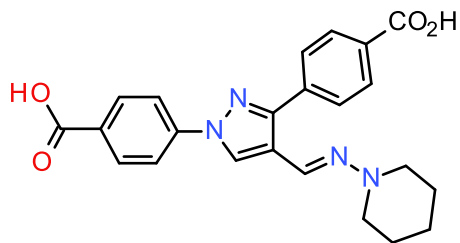

**4-[1-(4-carboxyphenyl)-4-[(E)-1-piperidyliminomethyl]pyrazol-3-yl]benzoic acid (6)**

Yellow solid, (376 mg, 91%). <sup>1</sup>H NMR 300 MHz (DMSO-d<sub>6</sub>): 8.77 (s, 1H), 8.06-8.03 (m, 6H), 7.88 (d, J = 8.0 Hz, 2H), 7.59 (s, 1H), 3.05 (s, 4H), 1.63 (s, 4H), 1.46 (s, 2H); <sup>13</sup>C NMR (75MHz, DMSO-d<sub>6</sub>) δ = 167.6, 167.2, 150.2, 142.4, 137.0, 131.3, 131.0, 130.0, 129.2, 128.6, 126.8, 126.1, 120.7, 118.4, 51.8, 25.0, 24.0.

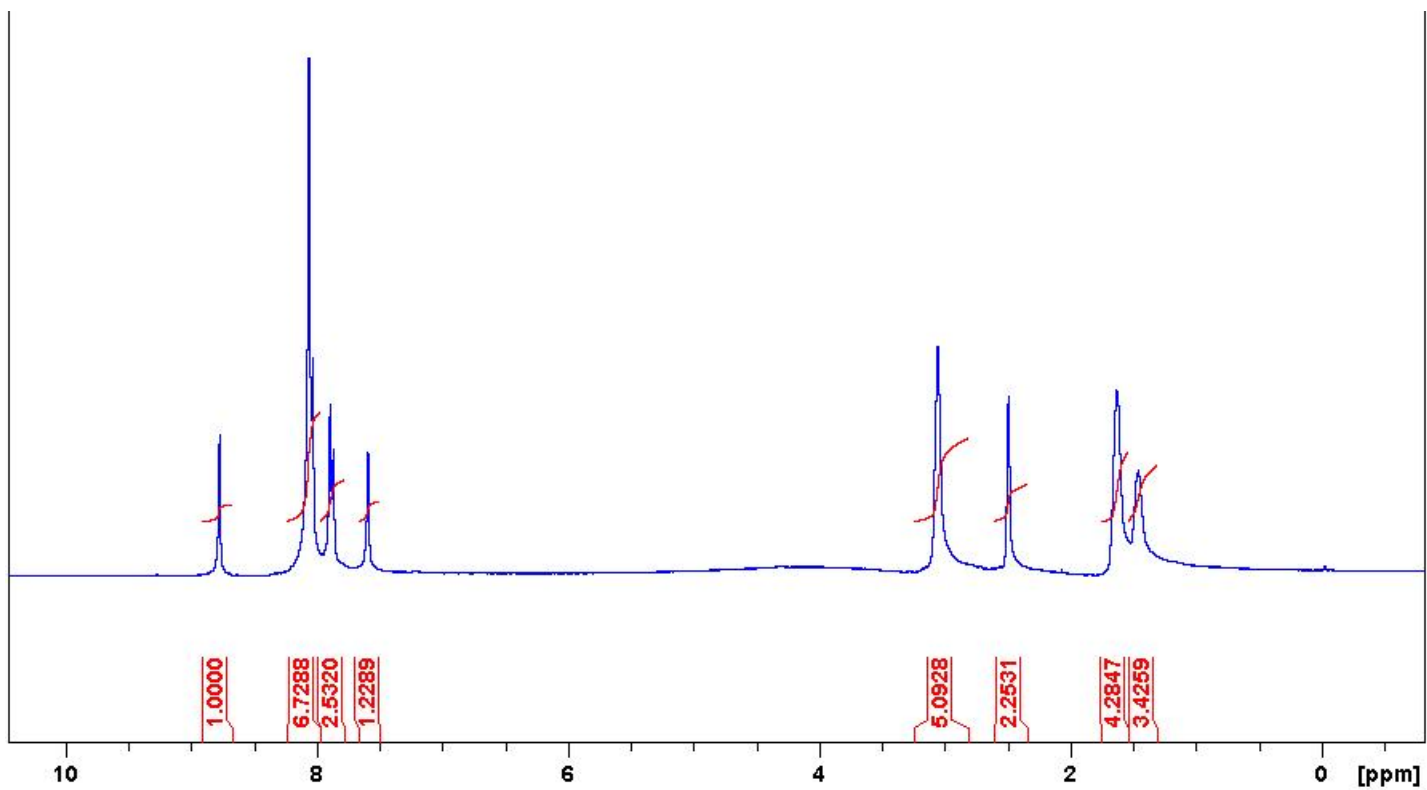

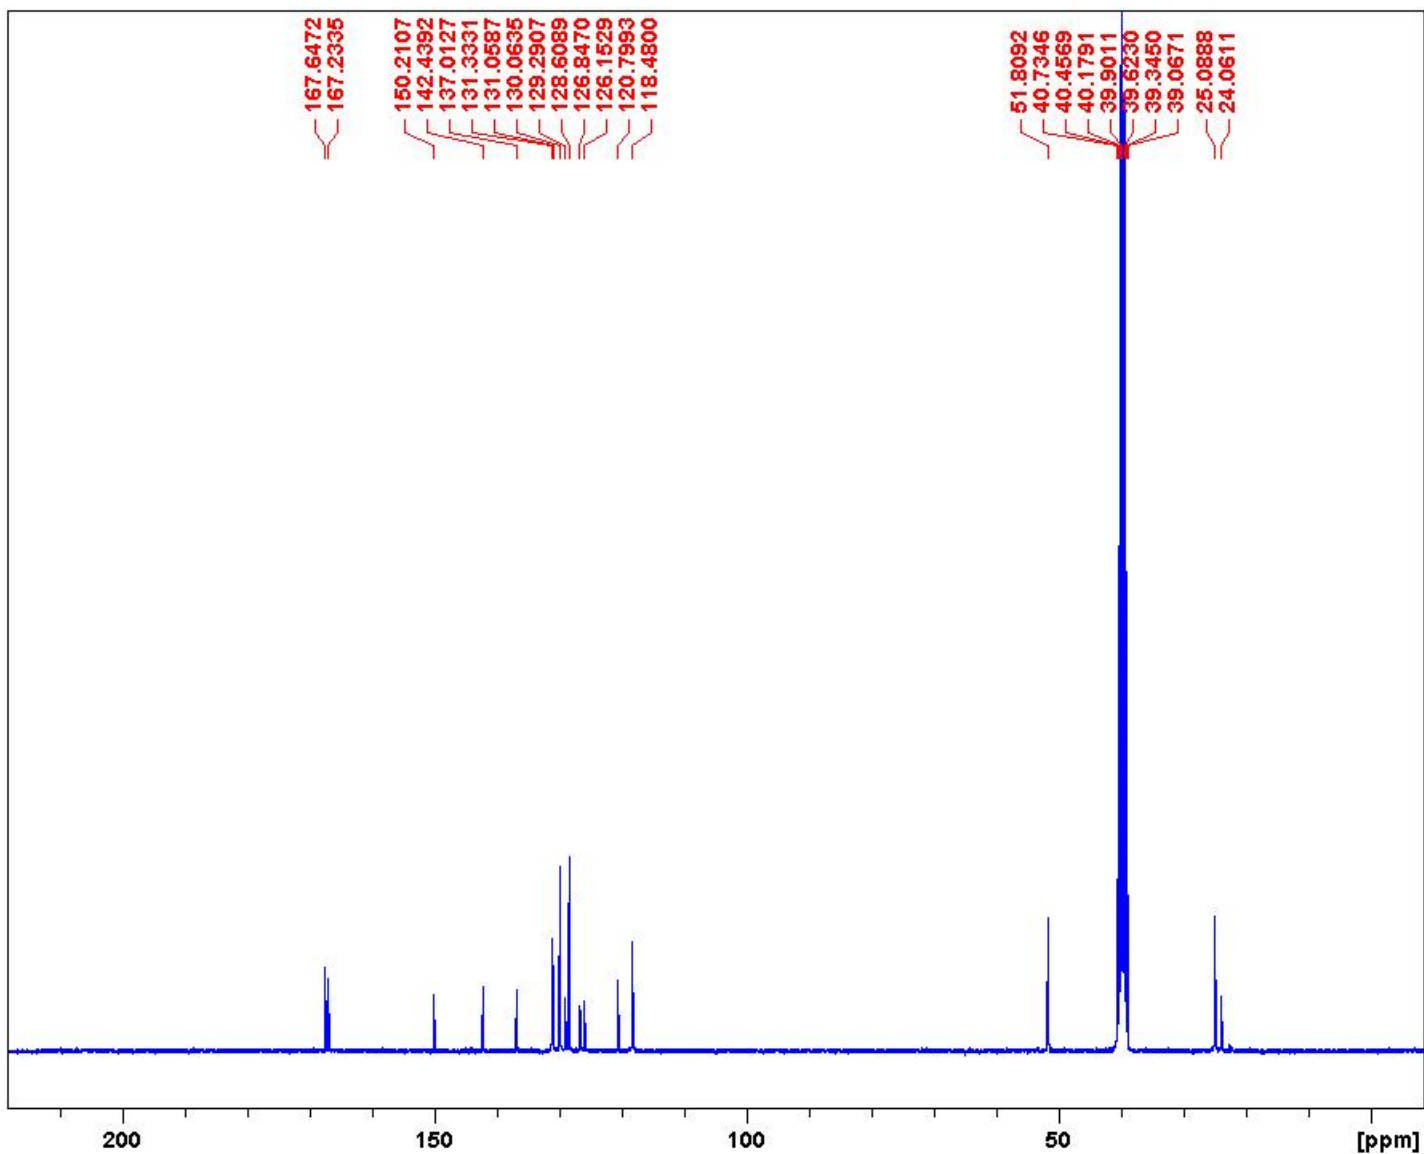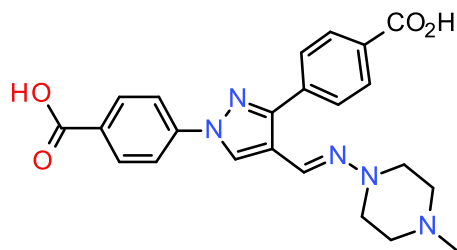

**4,4'-{4-[(*E*)-(4-methylpiperazin-1-yl)imino)methyl]-1*H*-pyrazole-1,3-diyl}dibenzoic acid (7)**

Yellow solid (402 mg, 93%). <sup>1</sup>H NMR 300 MHz (DMSO-*d*<sub>6</sub>): δ 8.80 (s, 1H), 8.06 (s, 4H), 8.04 (d, *J* = 8.7 Hz, 2H), 7.88 (d, *J* = 8.3 Hz, 2H), 7.64 (s, 1H), 3.13 (br s, 4H), 2.60 (br s, 4H), 2.29 (s, 3H); <sup>13</sup>C NMR (75MHz, DMSO-*d*<sub>6</sub> + CDCl<sub>3</sub>) δ = 167.8, 167.4, 150.3, 142.3, 136.7, 131.4, 131.3, 130.0, 129.7, 128.6, 128.0, 127.1, 120.3, 118.5, 53.9, 50.4, 45.4.

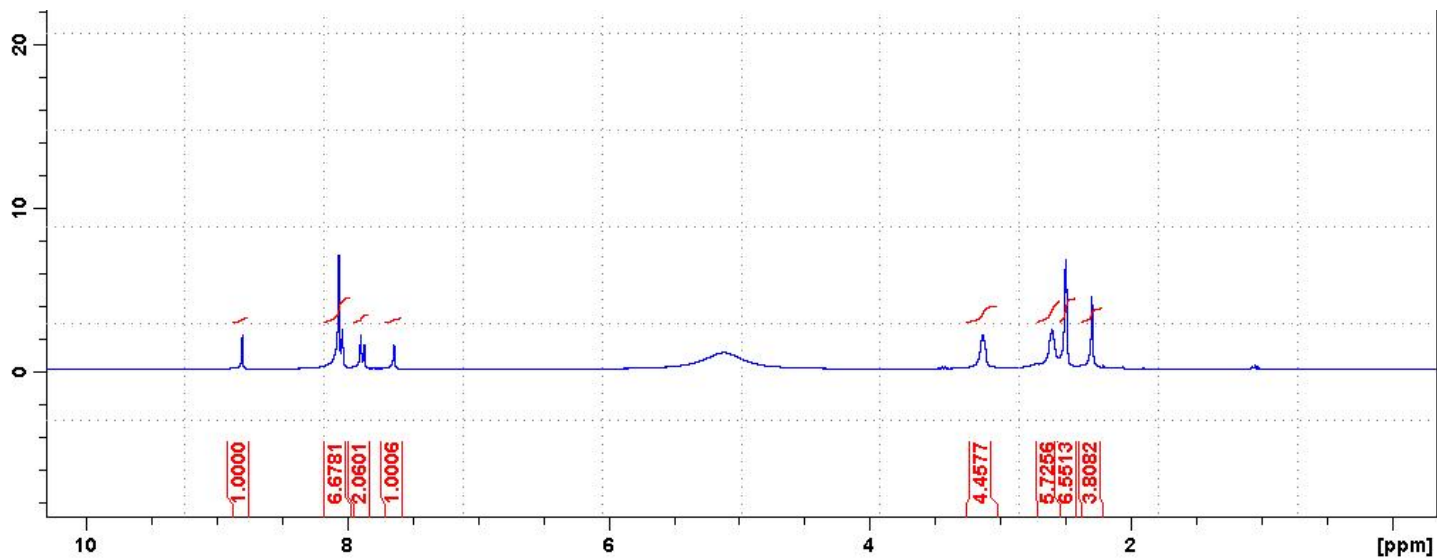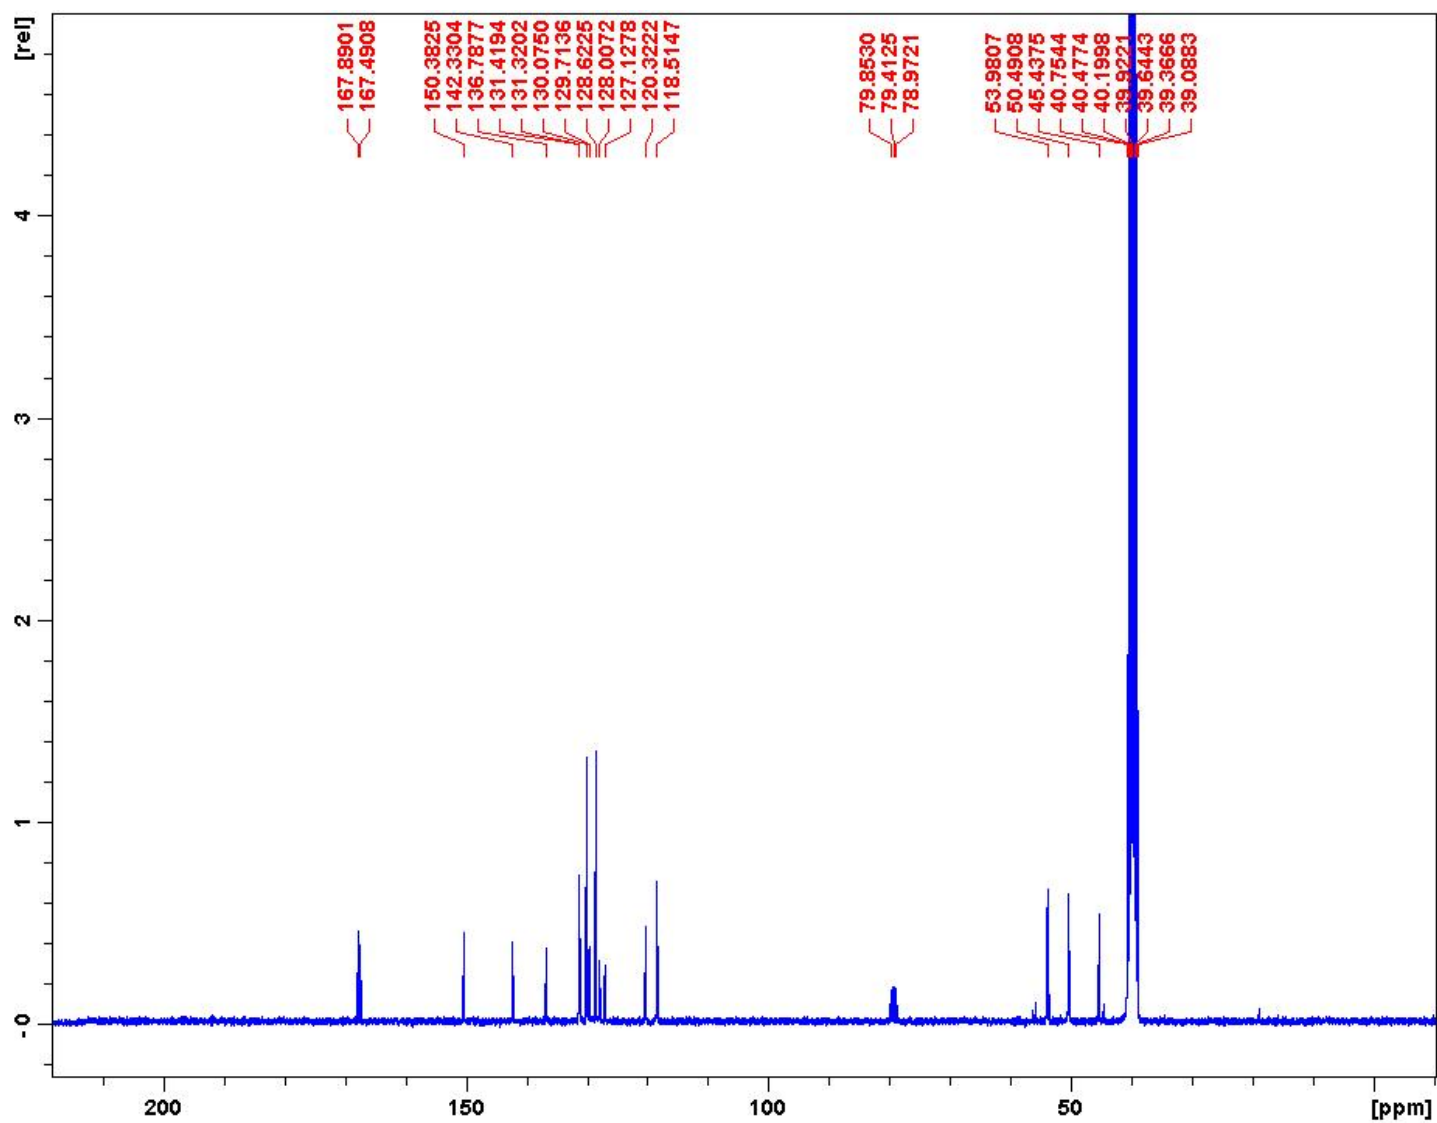

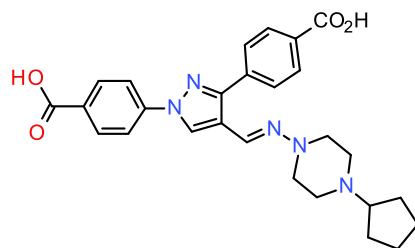

**4-[1-(4-carboxyphenyl)-4-[(E)-(4-cyclopentylpiperazin-1-yl)iminomethyl]pyrazol-3-yl]benzoic acid (8)**

Yellow solid (457 mg, 94%).  $^1\text{H}$  NMR, 300 MHz (DMSO- $d_6$ ): 8.83 (s, 1H), 8.11-8.04 (m, 6H), 7.89 (d,  $J = 8.1$  Hz, 2H), 7.62 (s, 1H), 3.08 (s, 4H), 2.60 (s, 4H), 2.50 (s, 1H), 1.79 (s, 2H), 1.59-1.34 (m, 6H),  $^{13}\text{C}$  NMR (75MHz, DMSO- $d_6$ )  $\delta = 167.6, 167.1, 150.3, 142.4, 136.9, 131.3, 131.0, 130.1, 129.3, 128.6, 127.5, 127.0, 120.4, 118.5, 66.8, 51.2, 51.0, 30.3, 24.1$ .

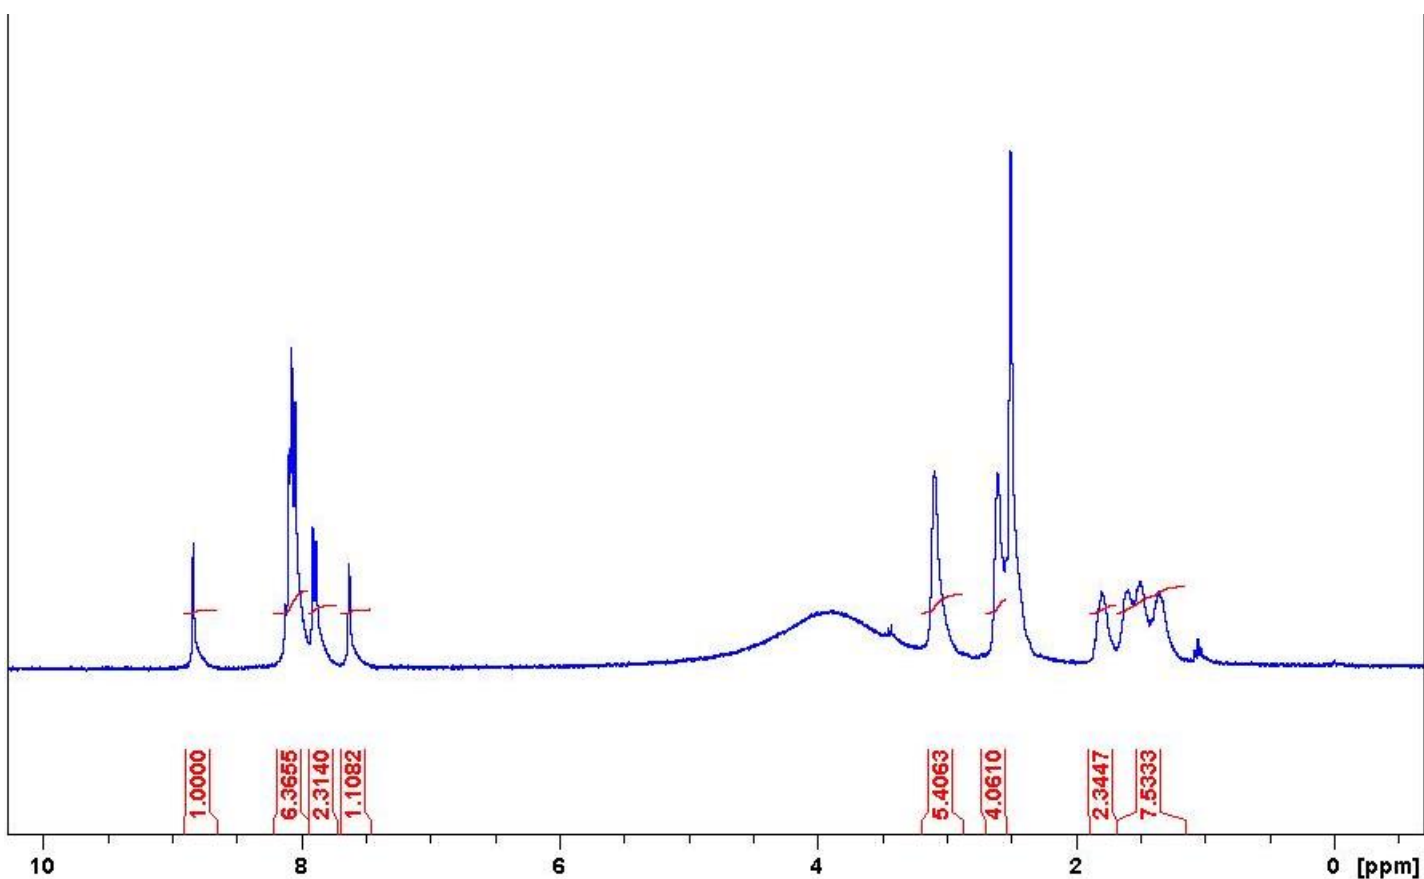



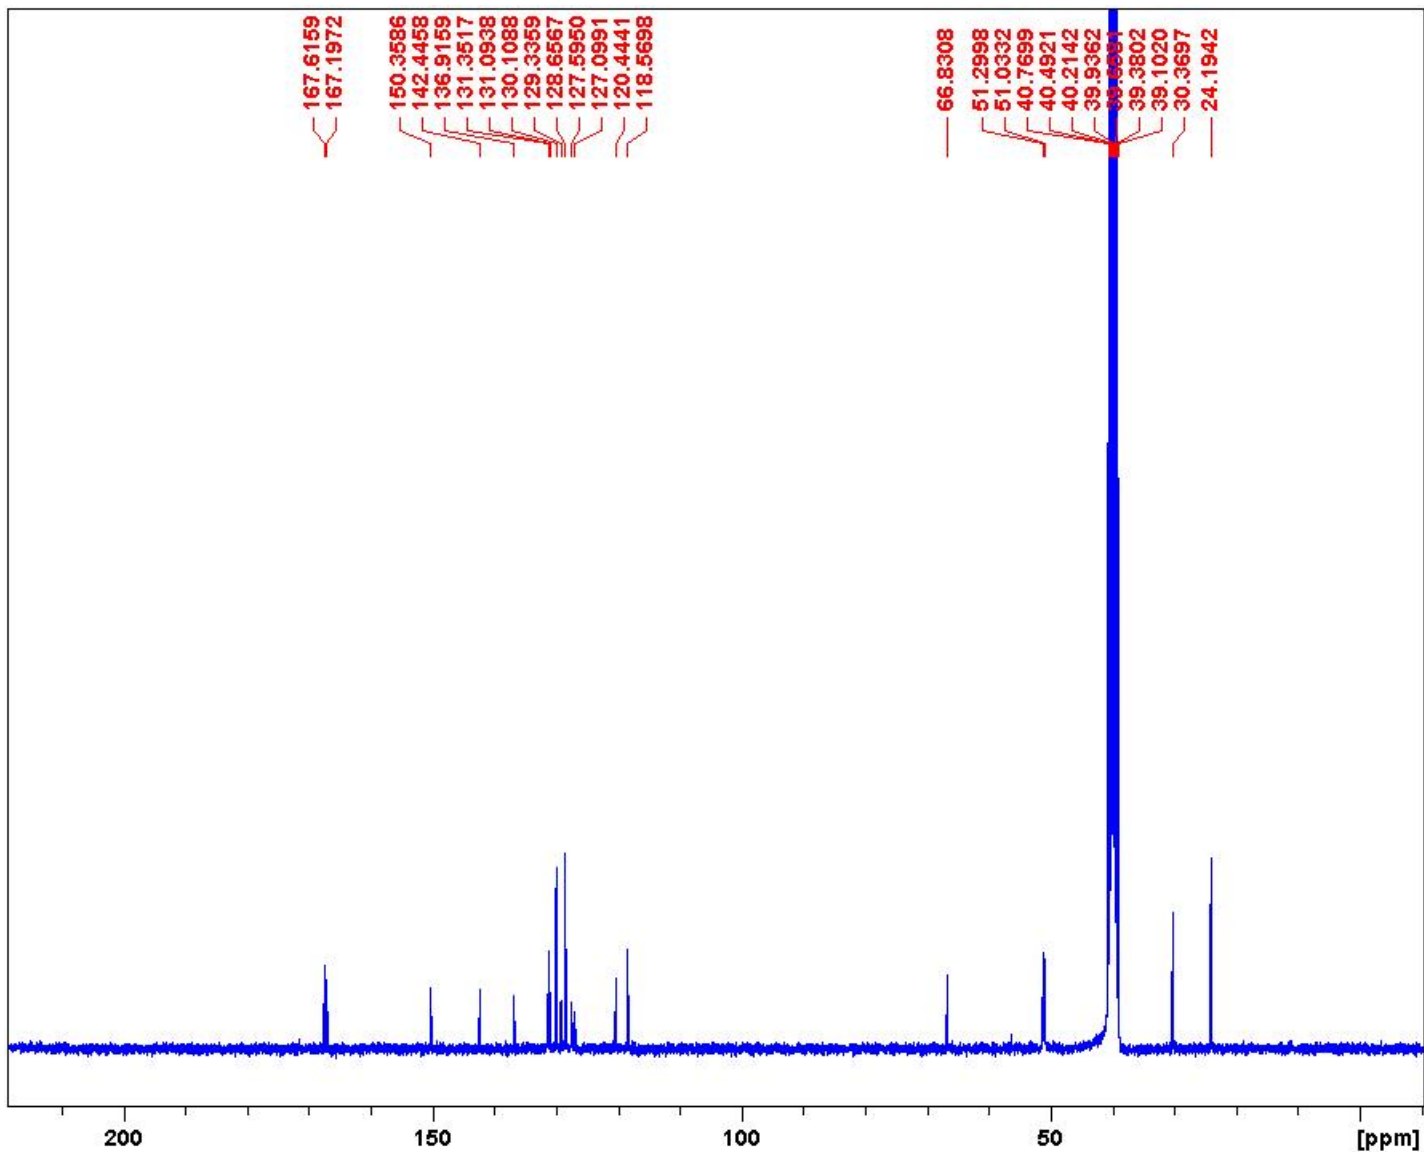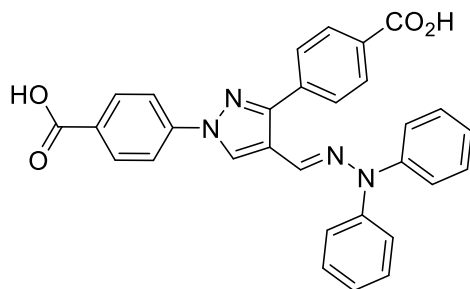

**4-[1-(4-carboxyphenyl)-4-[(E)-(diphenylhydrazono)methyl]pyrazol-3-yl]benzoic acid (9)**

Yellow solid (446 mg, 89%). <sup>1</sup>H NMR, 300 MHz (DMSO-d<sub>6</sub>): δ 9.12 (s, 1H), 8.14-8.06 (m, 4H), 7.97 (d, J = 8.1 Hz, 2H), 7.70 (d, J = 8.1 Hz, 2H), 7.44 (t, J = 7.8 Hz, 4H), 7.28-7.14 (m, 7H); <sup>13</sup>C NMR (75MHz, DMSO-d<sub>6</sub>) δ = 167.4, 167.0, 150.5, 143.2, 142.4, 136.9, 131.3, 130.9, 130.4, 129.8, 129.1, 128.6, 128.0, 127.8, 125.0, 122.5, 119.5, 118.5.

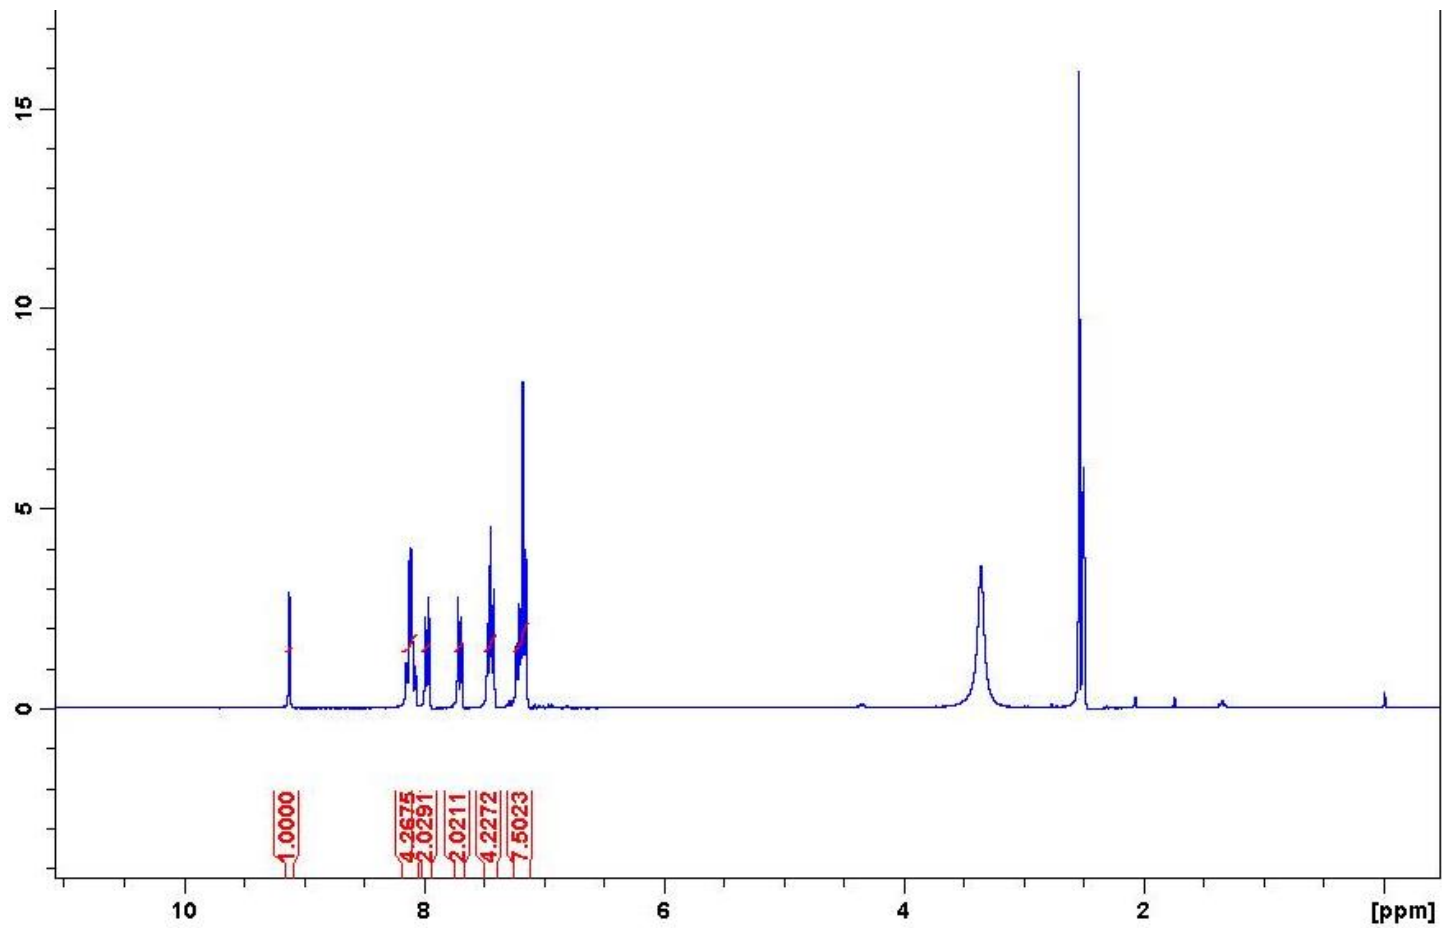

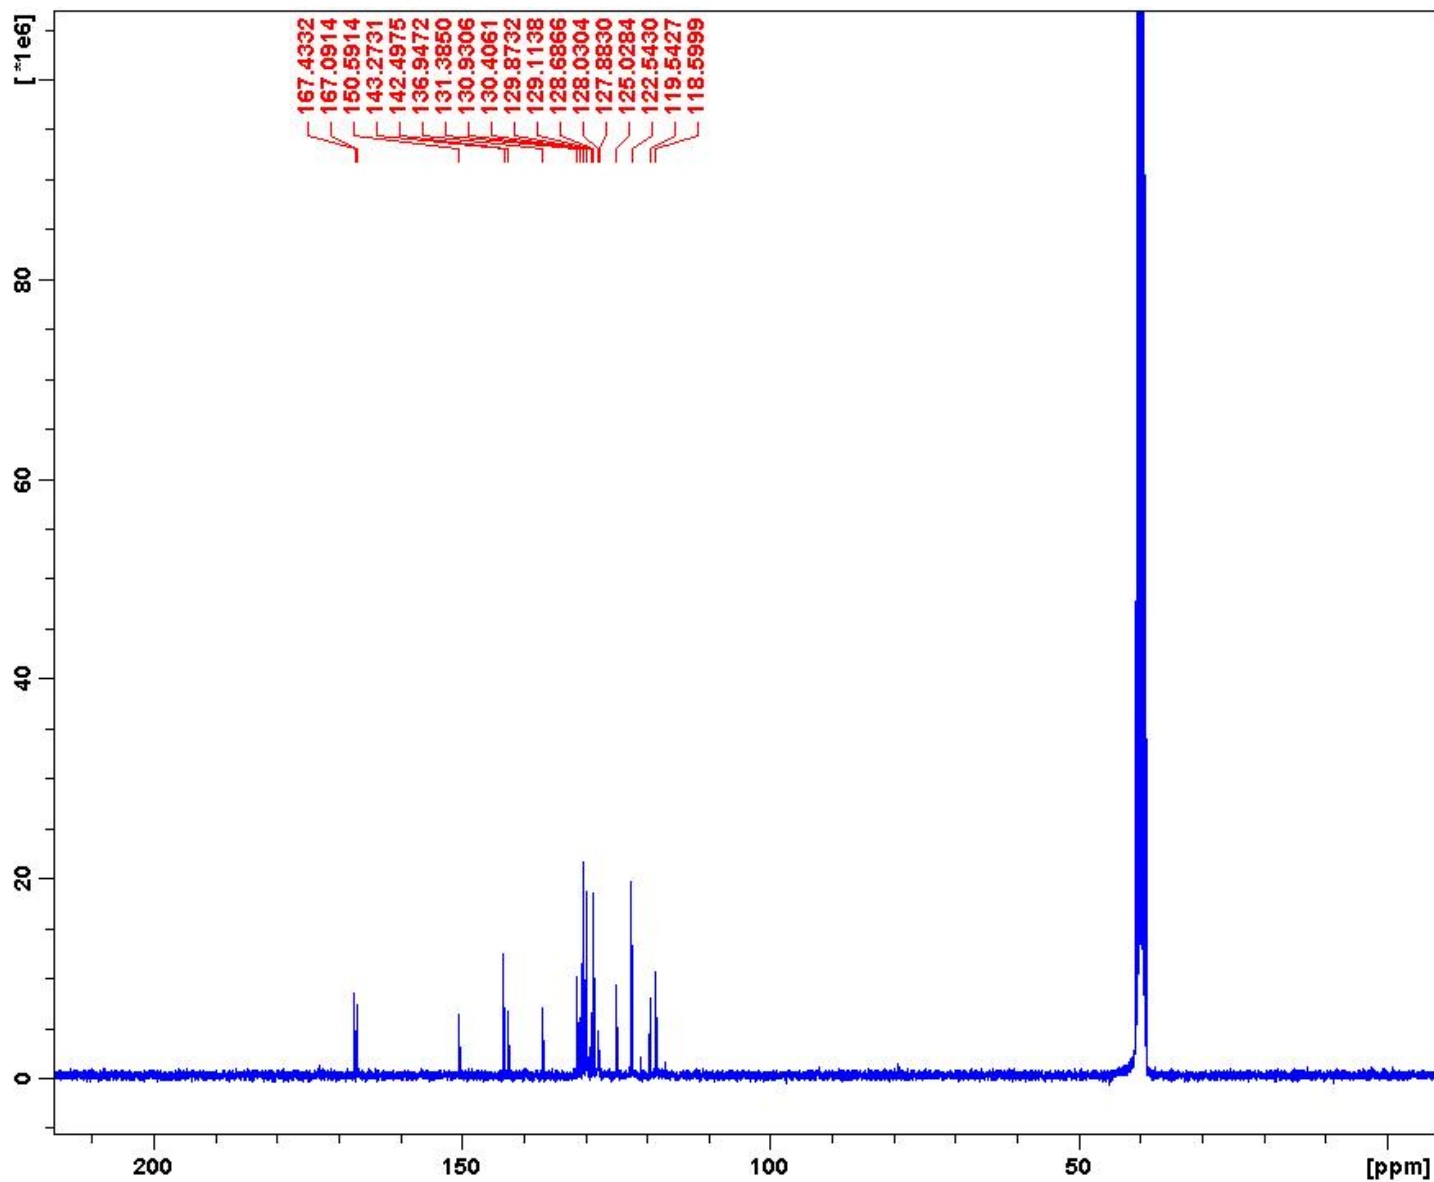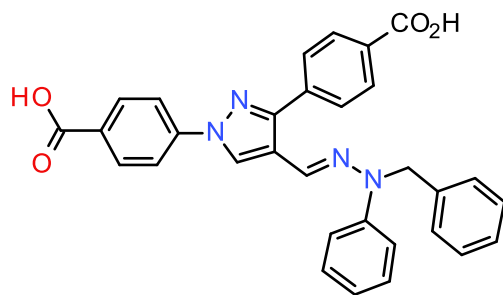

**4-[4-[(E)-[benzyl(phenyl)hydrazone]methyl]-1-(4-carboxyphenyl)pyrazol-3-yl]benzoic acid (10)**

Yellow solid (464 mg, 90%). (<sup>1</sup>H NMR, 300 MHz (DMSO-d<sub>6</sub>): δ 9.04 (s, 1H), 8.10-8.07 (m, 4H), 7.87 (d, J = 8.0 Hz, 2H), 7.47-7.35 (m, 9H), 7.30 (t, J = 7.9 Hz, 1H), 7.21 (d, J = 7.1 Hz, 2H), 6.91 (t, J = 7.2 Hz, 1H), 5.30 (s, 2H); <sup>13</sup>C NMR (75MHz, DMSO-d<sub>6</sub>) δ = 168.0, 167.7, 150.3, 147.7, 142.0, 136.5, 136.1, 132.5, 131.2, 130.0, 129.5, 129.3, 127.9, 127.5, 126.8, 126.6, 125.8, 120.5, 120.0, 118.4, 114.7, 48.9.

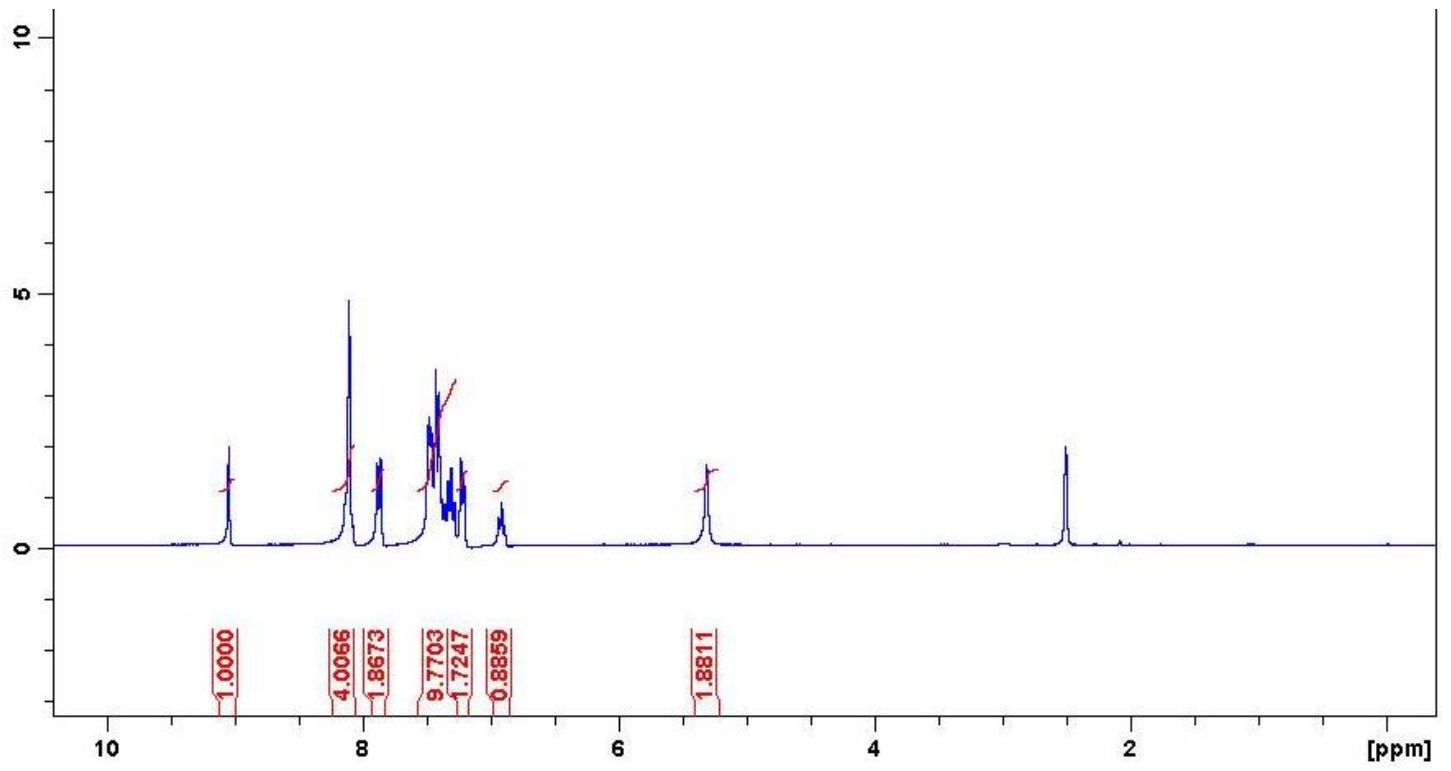

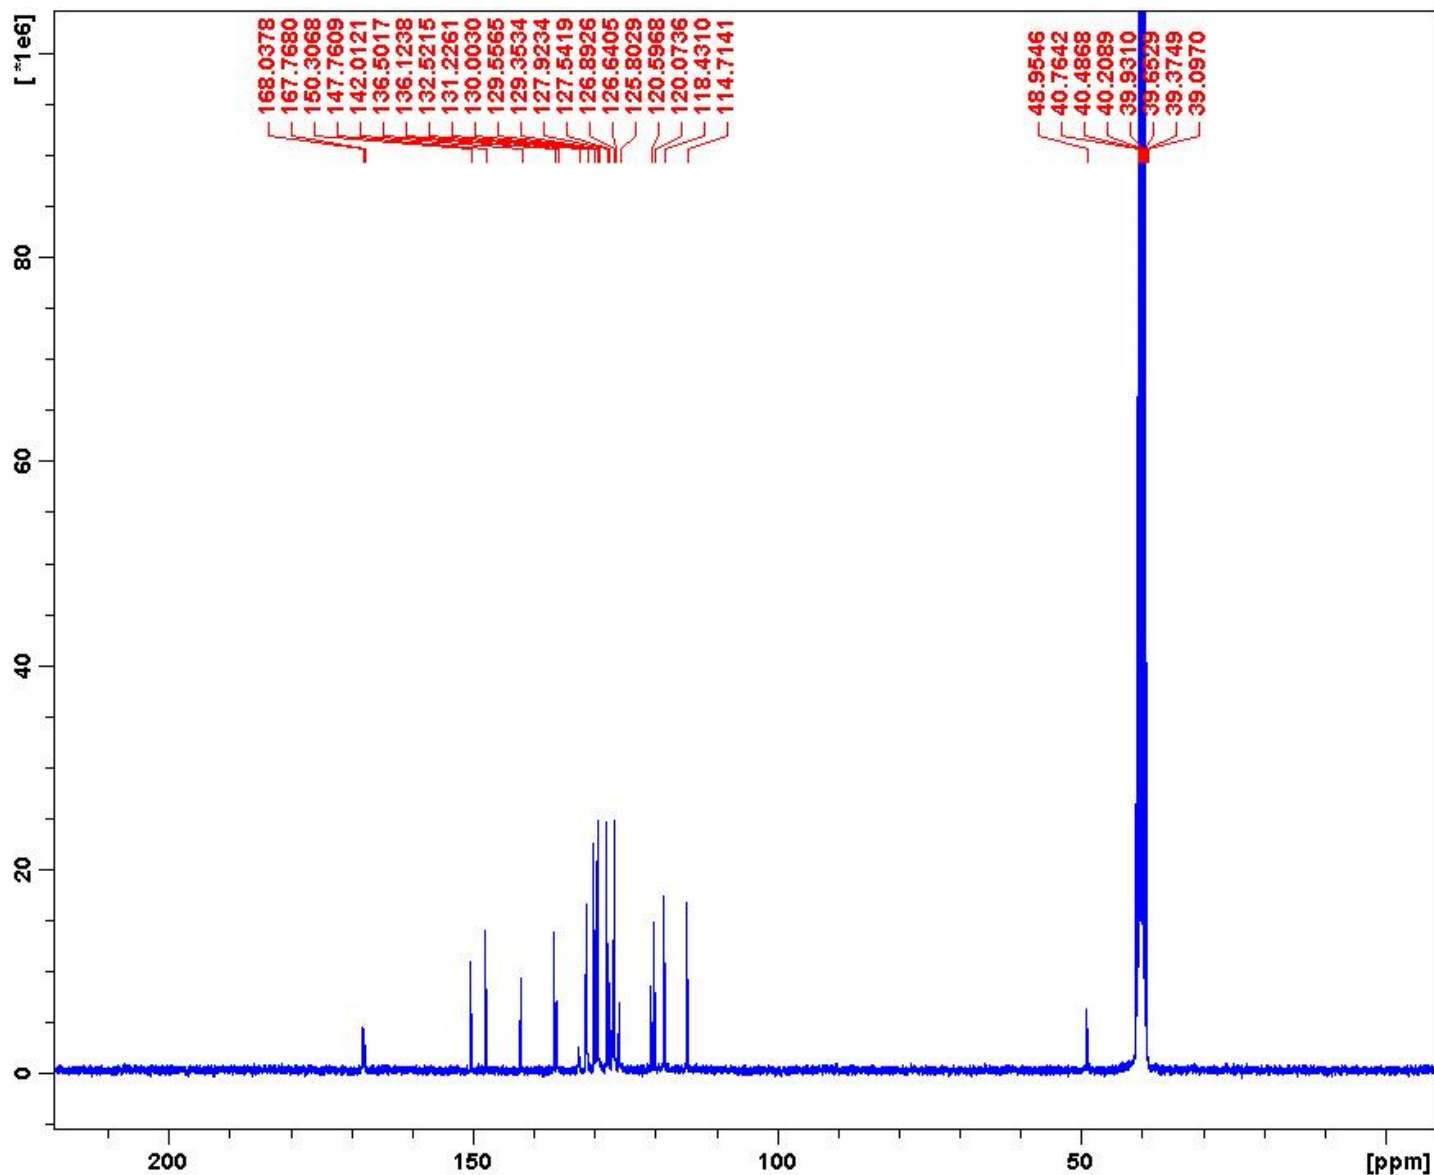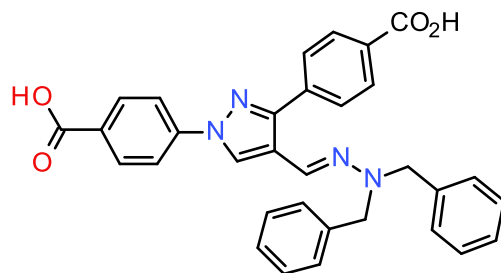

**4-[1-(4-carboxyphenyl)-4-[(E)-(dibenzylhydrazono)methyl]pyrazol-3-yl]benzoic acid (11)**

Yellow solid (487 mg, 92%). <sup>1</sup>H NMR, 300 MHz (DMSO-d<sub>6</sub>): 8.79 (s, 1H), 8.11-8.03 (m, 4H), 7.82 (d, J = 8.1 Hz, 2H), 7.39-7.21 (m, 12H), 7.08 (s, 1H), 4.56 (s, 4H); <sup>13</sup>C NMR (75 MHz DMSO-d<sub>6</sub>): 167.4, 167.1, 149.6, 142.5, 138.3, 136.8, 131.3, 130.4, 129.9, 129.0, 128.6, 127.9, 127.8, 127.5, 125.9, 123.9, 120.6, 118.5, 58.1.

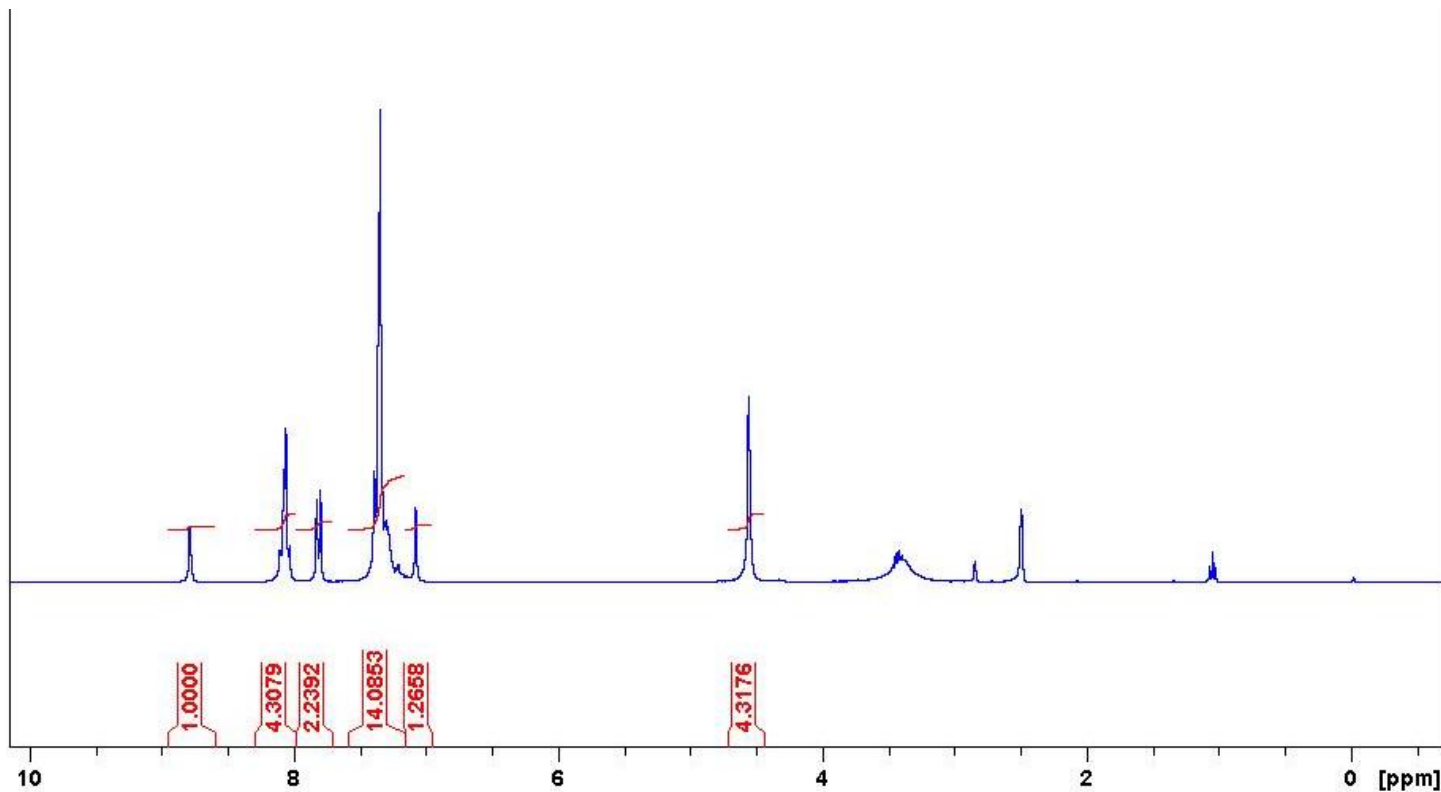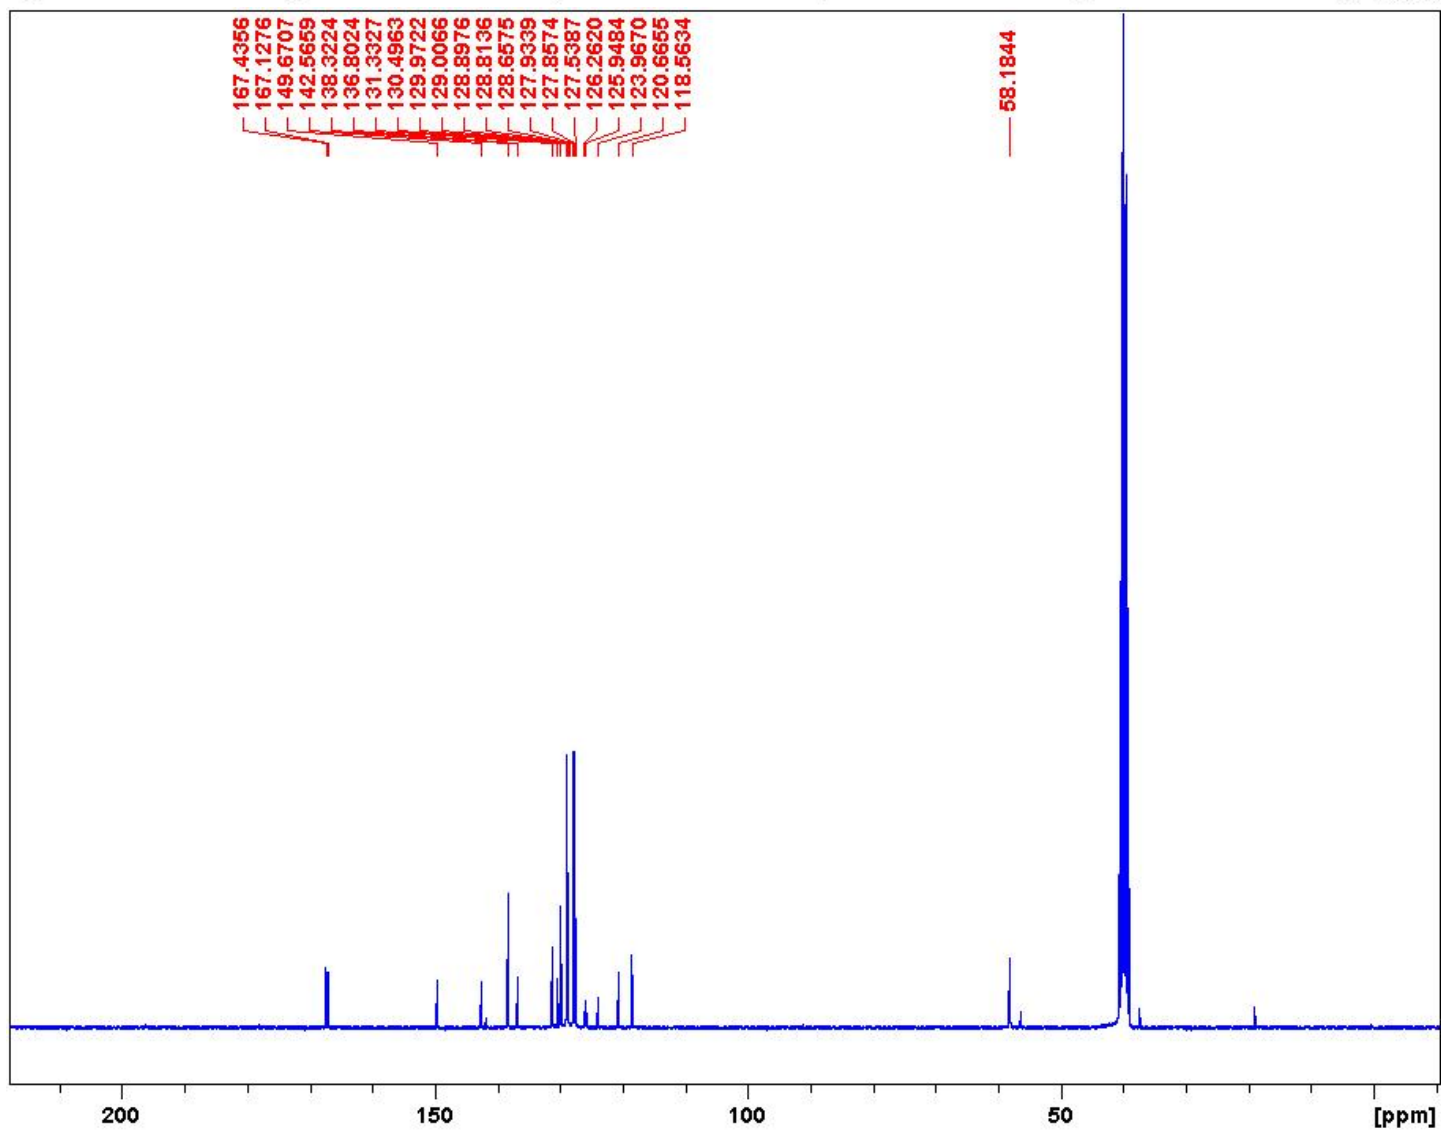

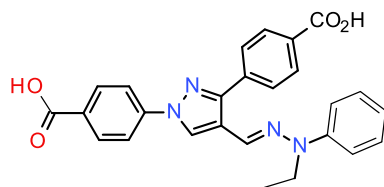

**4-[1-(4-carboxyphenyl)-4-[(E)-[ethyl(phenyl)hydrazone]methyl]pyrazol-3-yl]benzoic acid (12)**

Yellow solid (399 mg, 88%).  $^1\text{H}$  NMR, 300 MHz (DMSO- $d_6$ ): 9.04 (s, 1H), 8.17-8.07 (m, 6H), 7.91 (m, 2H), 7.69 (s, 1H), 7.32-7.21 (m, 4H), 6.85 (t, 1H), 4.02 (q,  $J = 6.5$  Hz, 2H), 1.13 (t,  $J = 6.6$  Hz, 3H);  $^{13}\text{C}$  NMR (75 MHz DMSO- $d_6$ ): 167.5, 167.1, 150.4, 146.5, 142.5, 137.3, 131.3, 130.8, 130.1, 129.4, 128.9, 128.8, 127.3, 123.7, 120.8, 120.1, 118.5, 114.4, 38.7, 9.9.

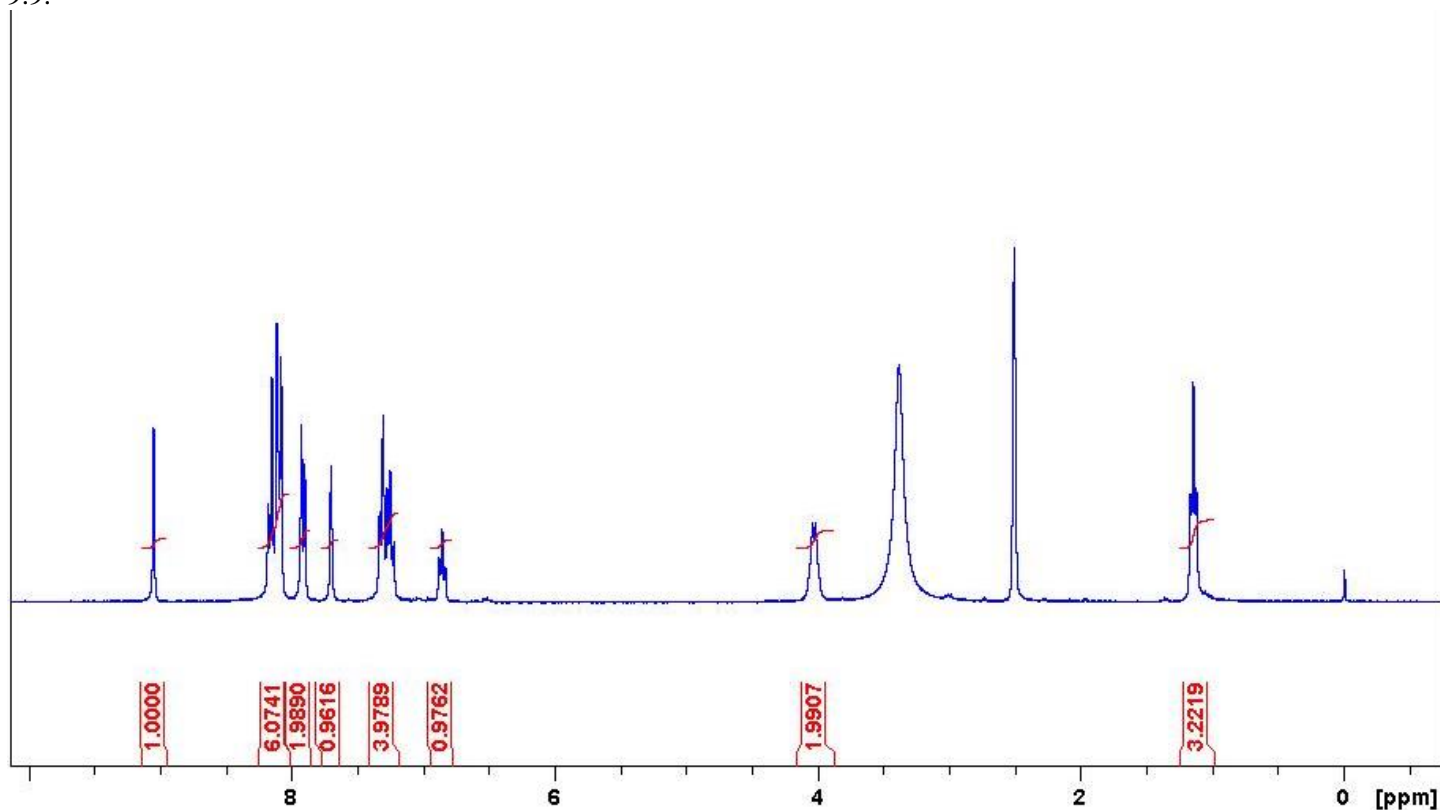

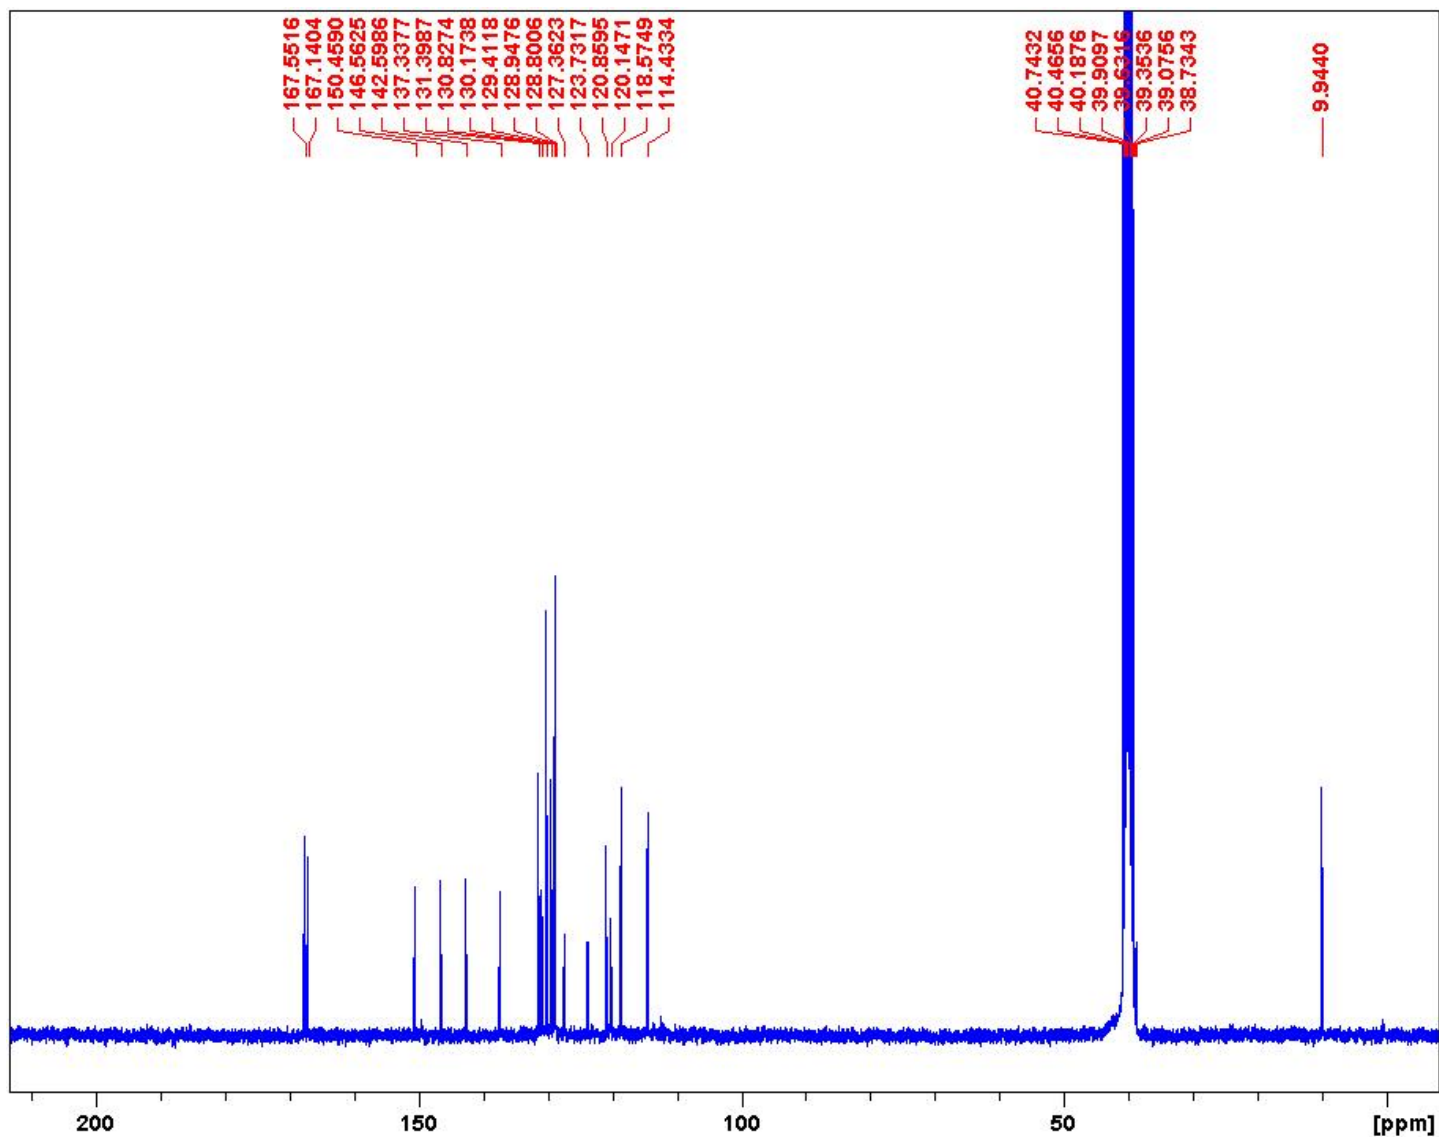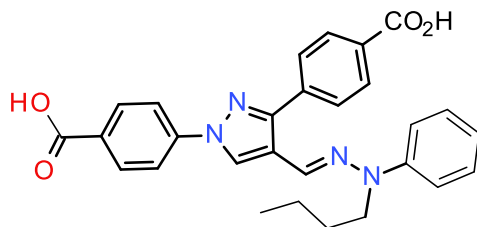

**4-[4-[(E)-[butyl(phenyl)hydrazono]methyl]-1-(4-carboxyphenyl)pyrazol-3-yl]benzoic acid (13)**

Yellow solid (428 mg, 89%). <sup>1</sup>H NMR, 300 MHz (DMSO-d<sub>6</sub>): 9.06 (s, 1H), 8.17-8.05 (m, 6H), 7.89 (d, J = 8.2 Hz, 2H), 7.65 (s, 1H), 7.33-7.21 (m, 4H), 6.84 (t, J = 6.9 Hz, 1H), 3.92 (s, 2H), 1.55-1.53 (m, 2H), 1.42-1.34 (m, 2H), 0.93 (t, J = 7.1 Hz, 3H); <sup>13</sup>C NMR (75 MHz DMSO-d<sub>6</sub>): 167.5, 167.1, 150.4, 146.9, 142.5, 137.2, 131.3, 130.8, 130.0, 129.3, 128.9, 128.7, 127.1, 123.7, 120.7, 120.1, 118.5, 114.4, 43.9, 26.4, 20.0, 14.2.



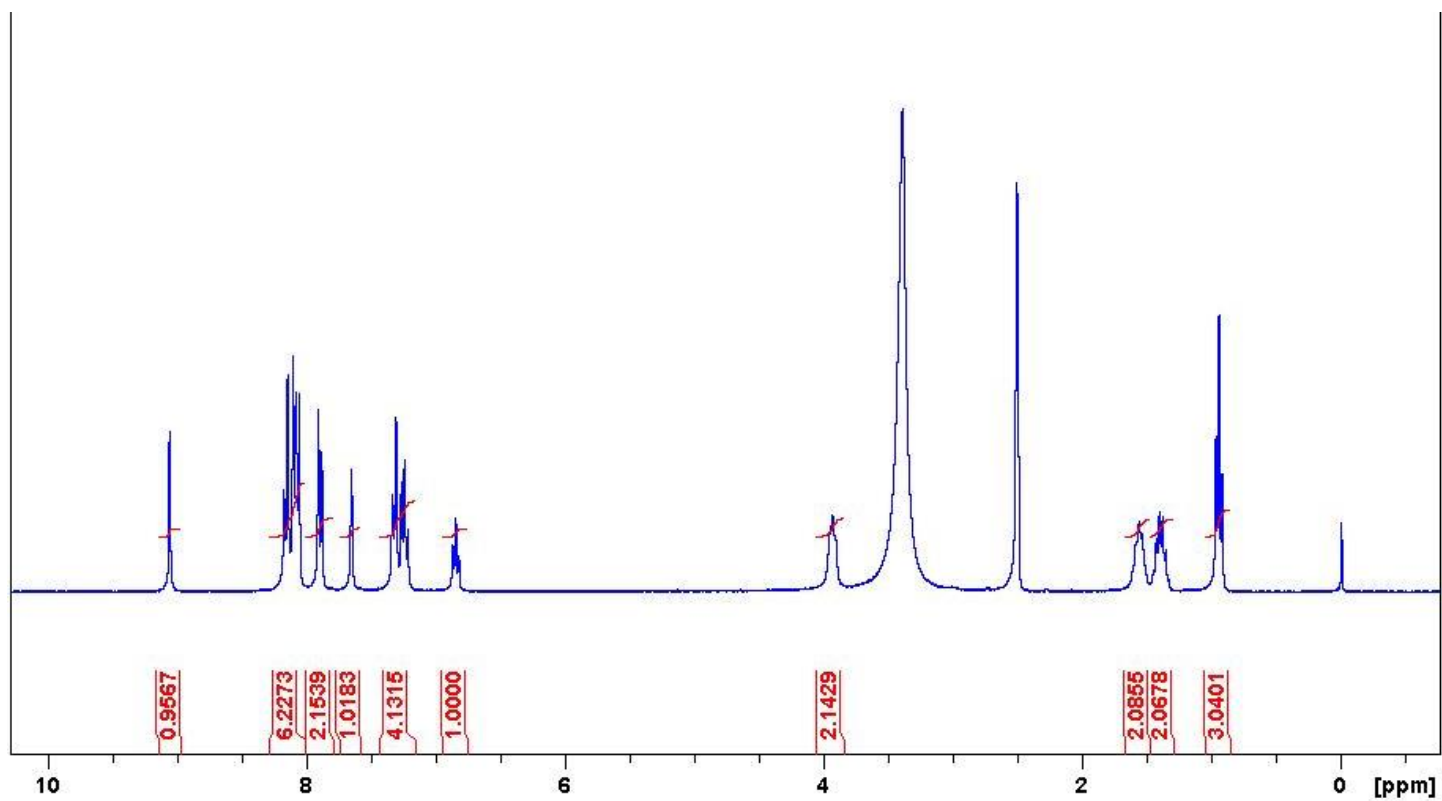

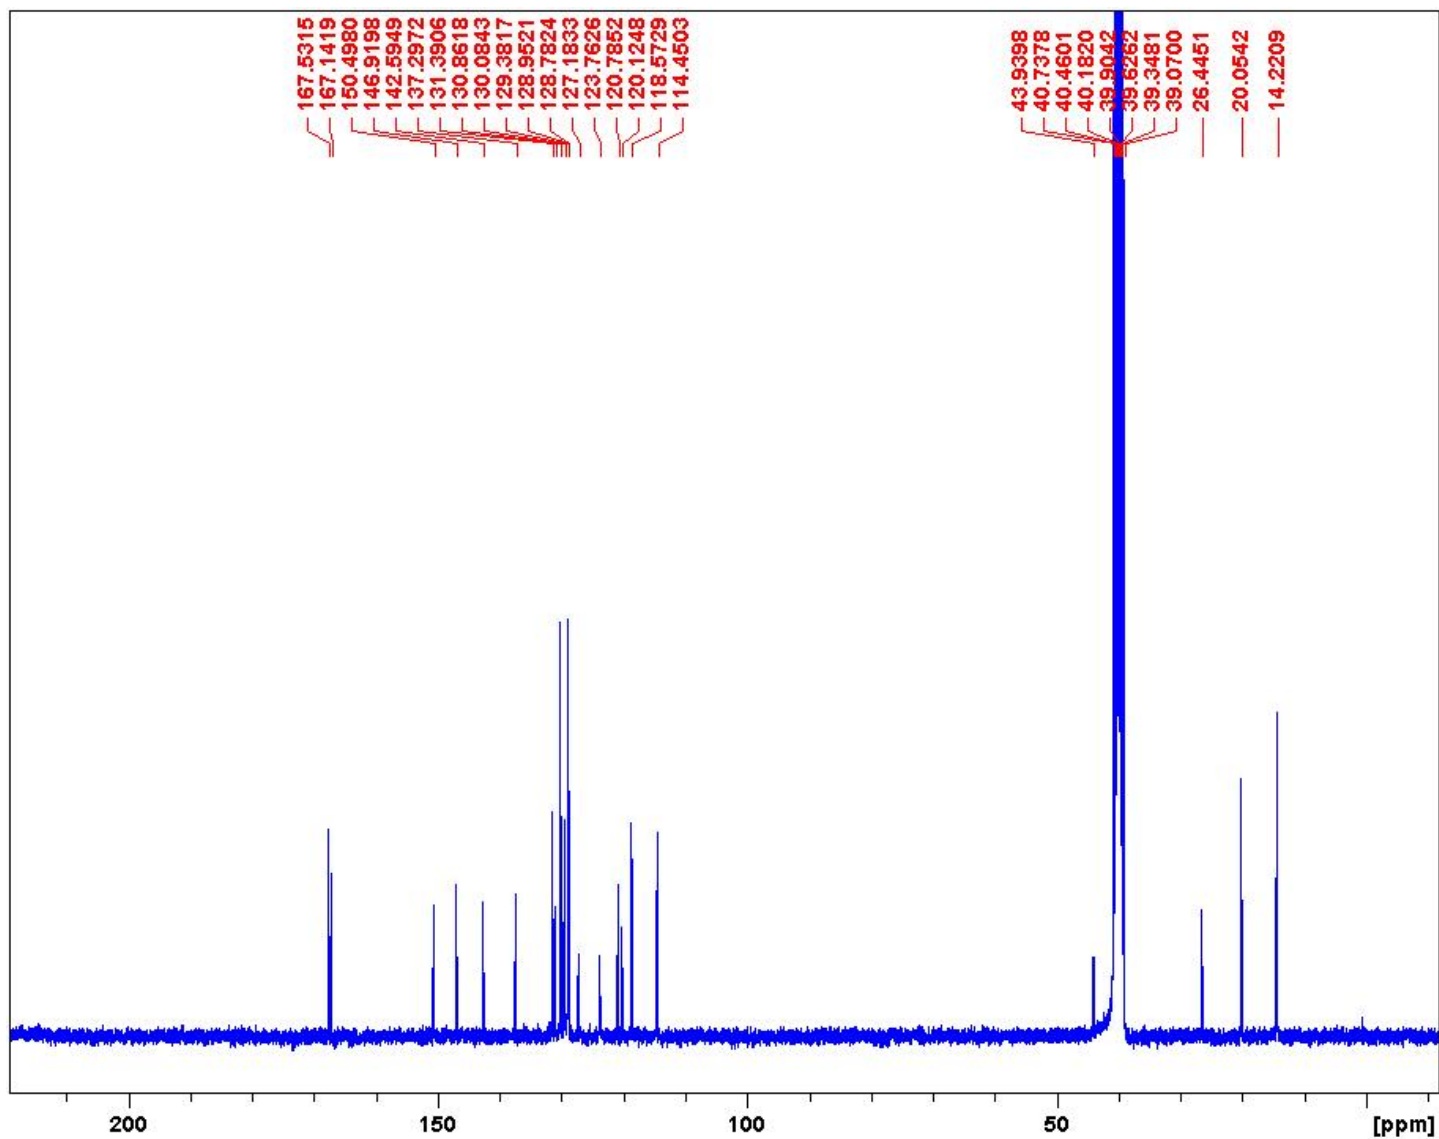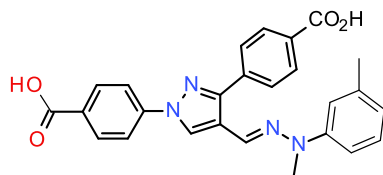

**4-[1-(4-carboxyphenyl)-4-[(E)-[methyl(m-tolyl)hydrazono]methyl]pyrazol-3-yl]benzoic acid (14)**

Yellow solid (408 mg, 90%). <sup>1</sup>H NMR (300 MHz DMSO-d<sub>6</sub>): δ 9.00 (s, 1H), 8.15-8.06 (m, 6H), 7.94 (d, J = 8.1 Hz, 2H), 7.64 (s, 1H), 7.13-7.09 (m, 3H), 6.66 (s, 1H), 3.37 (s, 3H), 2.25 (s, 3H); <sup>13</sup>C NMR (75MHz, DMSO-d<sub>6</sub>) δ = 167.5, 167.1, 150.3, 147.6, 142.5, 138.4, 137.4, 131.4, 130.7, 130.1, 129.1, 128.9, 128.8, 127.6, 124.3, 121.2, 120.7, 118.5, 115.5, 112.2, 32.9, 21.9.

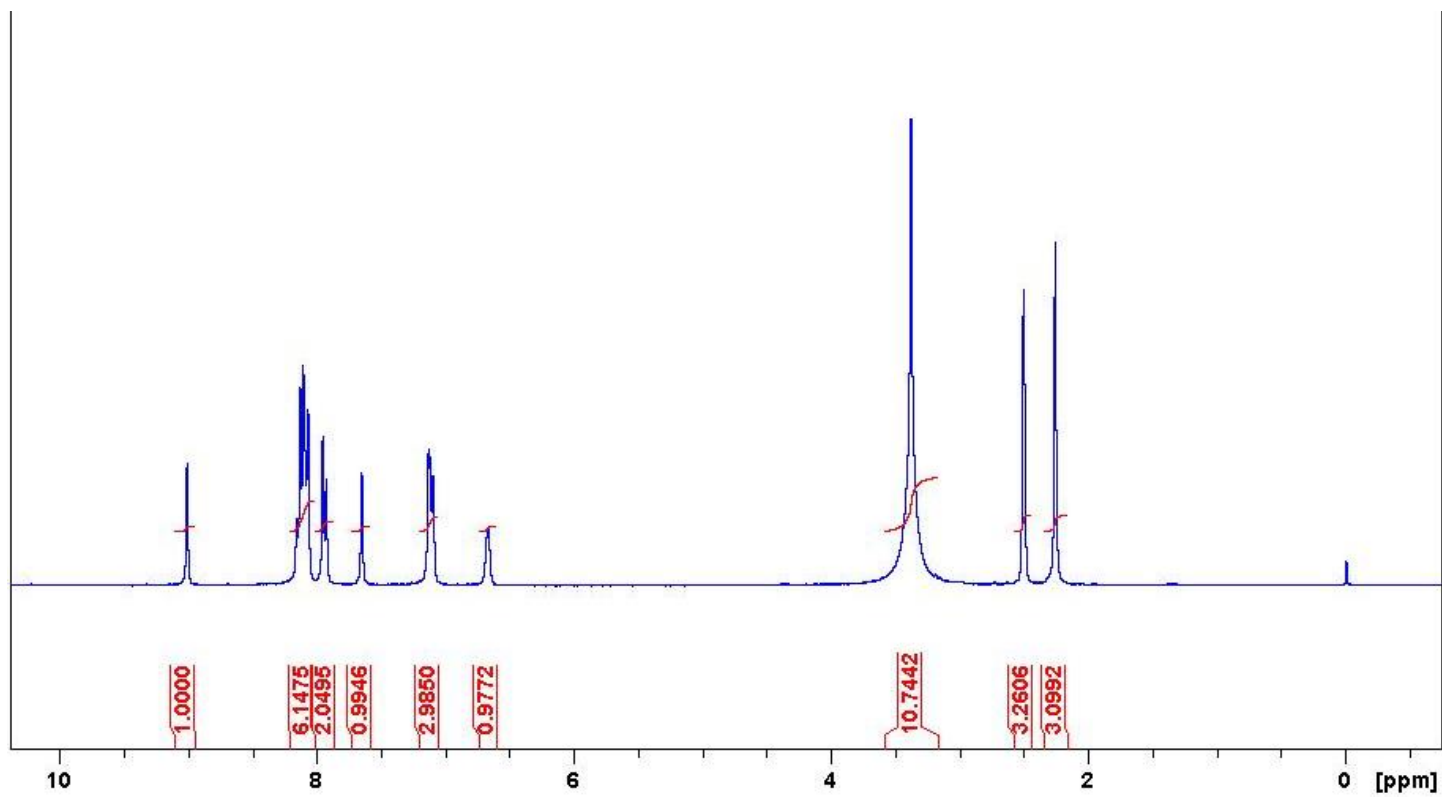

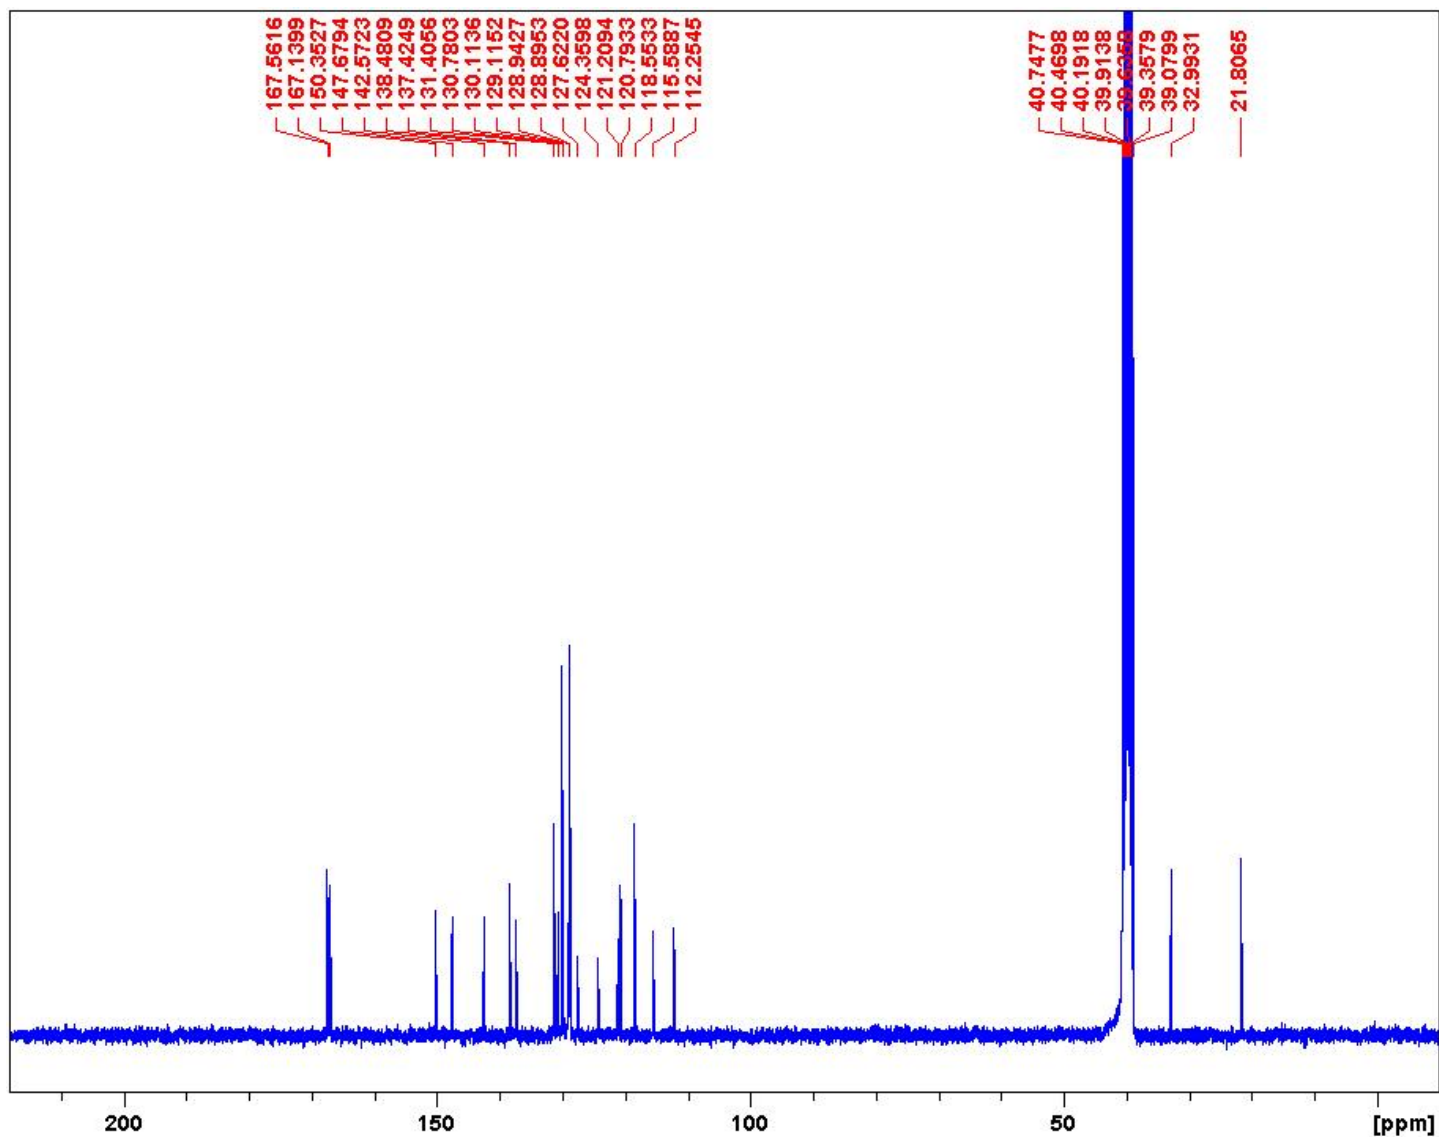

**4-[1-(4-carboxyphenyl)-4-[(E)-[ethyl(p-tolyl)hydrazone]methyl]pyrazol-3-yl]benzoic acid (15)**

Yellow solid (411 mg, 88%). <sup>1</sup>H NMR, 300 MHz (DMSO-d<sub>6</sub>): δ 9.01 (s, 1H), 8.18-8.06 (m, 6H), 7.90 (d, J = 8.1 Hz, 2H), 7.63 (s, 1H), 7.20 (d, J = 8.3 Hz, 2H), 7.05 (d, J = 8.3 Hz, 2H), 3.98 (q, J = 6.4 Hz, 2H), 2.23 (s, 3H), 1.11 (t, J = 6.3 Hz, 3H); <sup>13</sup>C NMR (75MHz, DMSO-d<sub>6</sub>) δ = 167.5, 167.1, 150.3, 144.4, 142.6, 137.3, 131.3, 130.7, 130.1, 129.8, 128.9, 128.8, 128.7, 127.2, 123.0, 120.9, 118.5, 114.6, 20.5, 9.9.

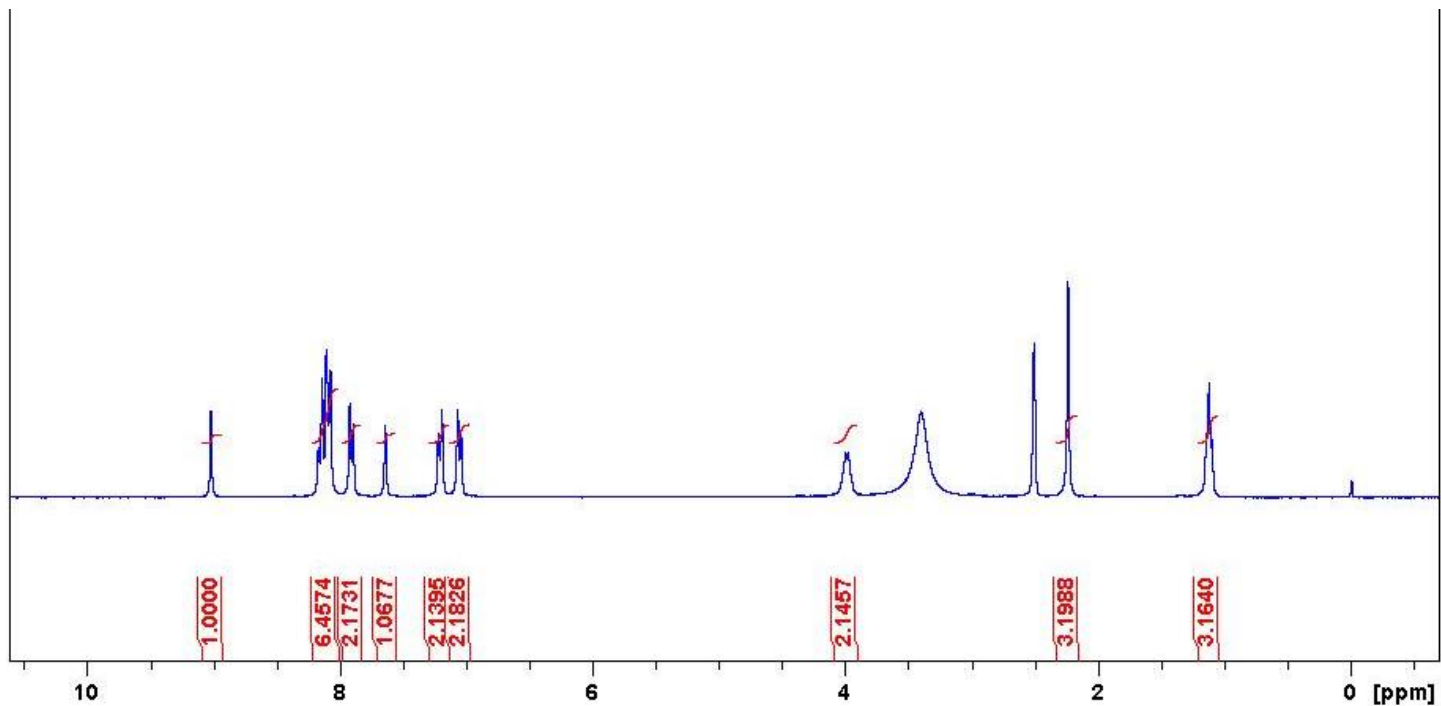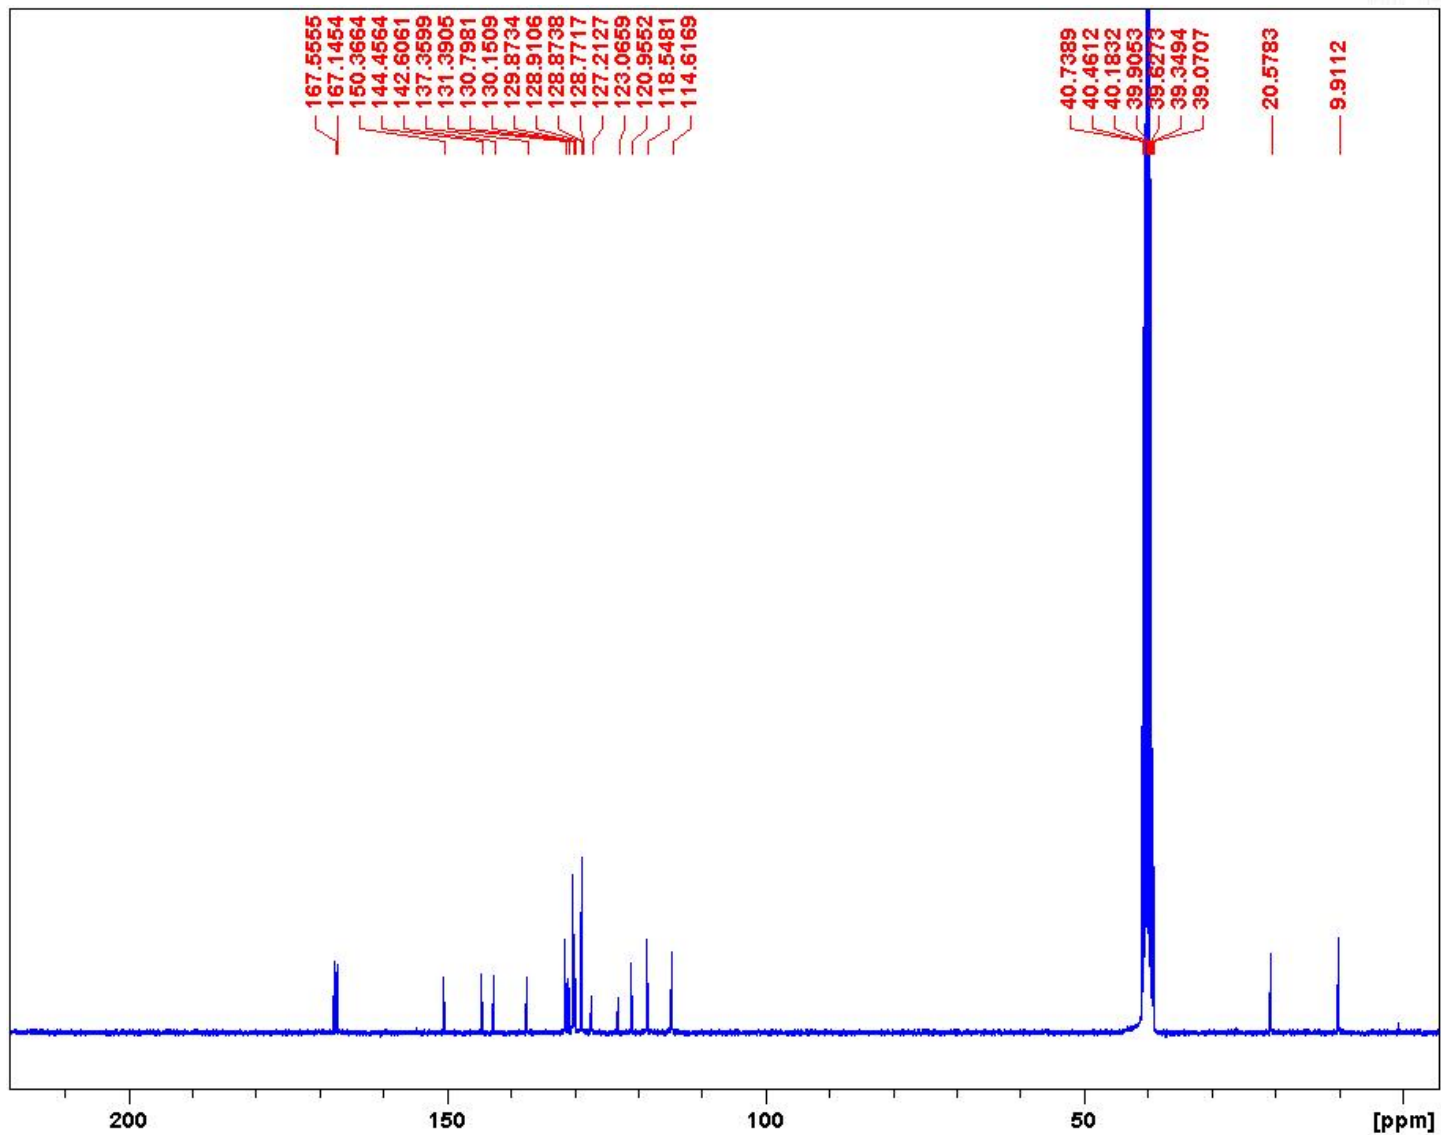

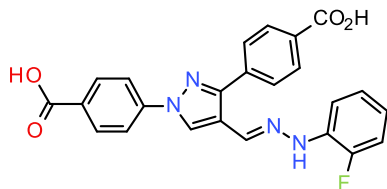

**4,4'-(4-{(E)-[2-(2-fluorophenyl)hydrazinylidene]methyl}-1H-pyrazole-1,3-diyl)dibenzoic acid (16)**

Brownish solid (346 mg, 78%).  $^1\text{H}$  NMR, 300 MHz (DMSO- $d_6$ ):  $\delta$  10.52 (s, 1H), 9.12 (s, 1H), 8.16-8.07 (m, 6H), 7.99 (s, 1H), 7.90 (d,  $J = 8.1$  Hz, 2H), 7.22-7.15 (m, 1H), 6.86 (d,  $J = 11.7$  Hz, 1H), 6.73 (d,  $J = 8.1$  Hz, 1H), 6.49 (t,  $J = 6.7$  Hz, 1H);  $^{13}\text{C}$  NMR (75MHz, DMSO- $d_6$ )  $\delta = 167.5, 167.1, 163.8$  ( $^1J_{\text{C-F}} = 238.8$  Hz), 150.4, 147.7 ( $^3J_{\text{C-F}} = 11.1$  Hz), 142.4, 136.9, 131.3, 131.03 (d,  $^3J_{\text{C-F}} = 10.0$  Hz), 131.0, 130.1, 130.0, 129.1, 128.8, 127.7, 119.6, 118.6, 108.4, 104.5 ( $^3J_{\text{C-F}} = 21.2$  Hz), 98.9 ( $^3J_{\text{C-F}} = 26.0$  Hz).

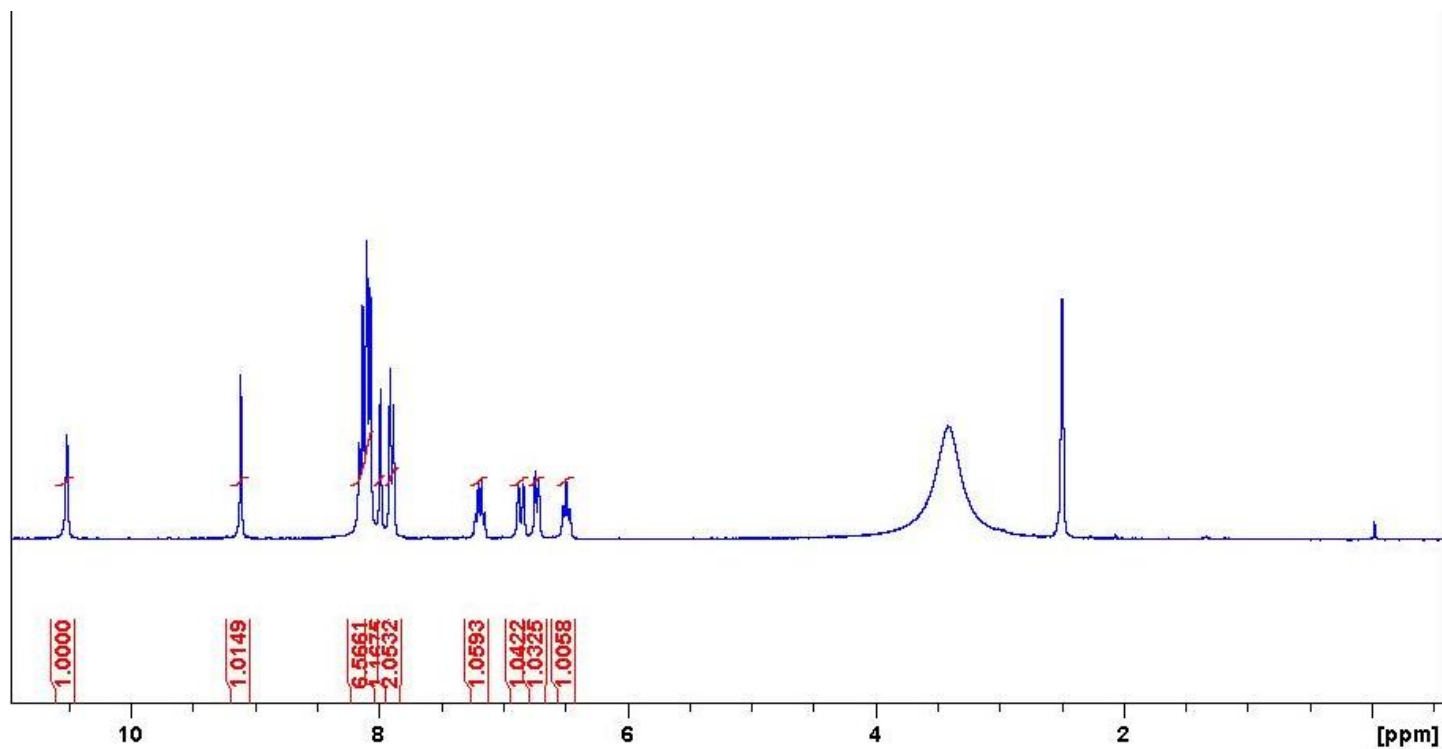

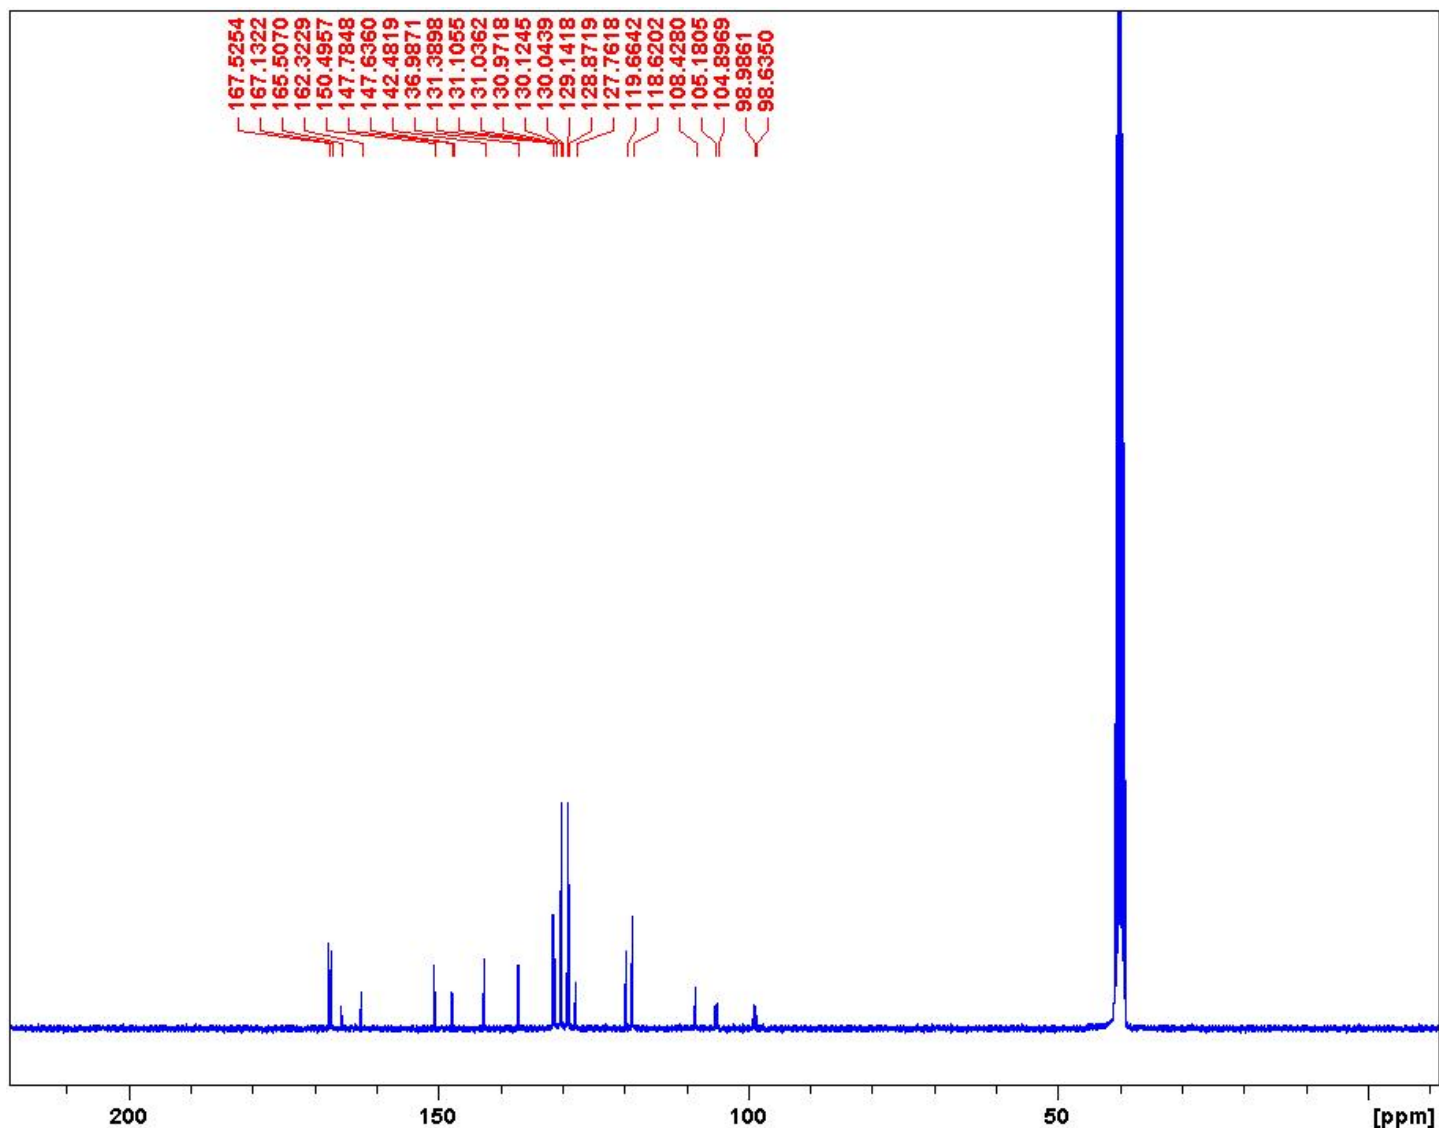

**4,4'-(4-{(E)-[2-(3-fluorophenyl)hydrazinylidene]methyl}-1H-pyrazole-1,3-diyl)dibenzoic acid (17)**

Brownish solid (346 mg, 78%). <sup>1</sup>H NMR, 300 MHz (DMSO-d<sub>6</sub>): δ 10.47 (s, 1H), 9.08 (s, 1H), 8.15-7.90 (m, 4H), 7.97 (s, 1H), 7.75 (d, J = 7.4 Hz, 2H), 7.55-7.48 (m, 2H), 7.19 (q, J = 6.8 Hz, 1H), 6.88 (d, J = 11.7 Hz, 1H), 6.74 (d, J = 8.0 Hz, 1H), 6.49 (t, J = 8.3 Hz, 1H); <sup>13</sup>C NMR (75MHz, DMSO-d<sub>6</sub>) δ = 167.1, 163.9 (d, <sup>1</sup>J = 238.6 Hz), 151.6, 147.8 (d, <sup>3</sup>J = 11.1 Hz), 142.6, 132.7, 131.3, 131.0 (d, <sup>3</sup>J = 10.1 Hz), 130.4, 129.0, 128.8, 127.2, 119.2, 118.9, 118.4, 108.4, 105.0 (<sup>2</sup>J = 20.5), 104.7, 98.8 (d, 2J = 26.1 Hz).

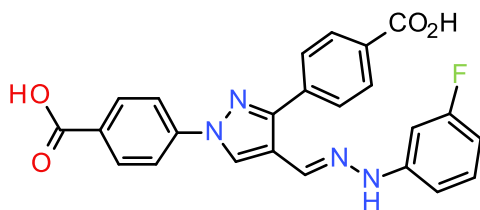

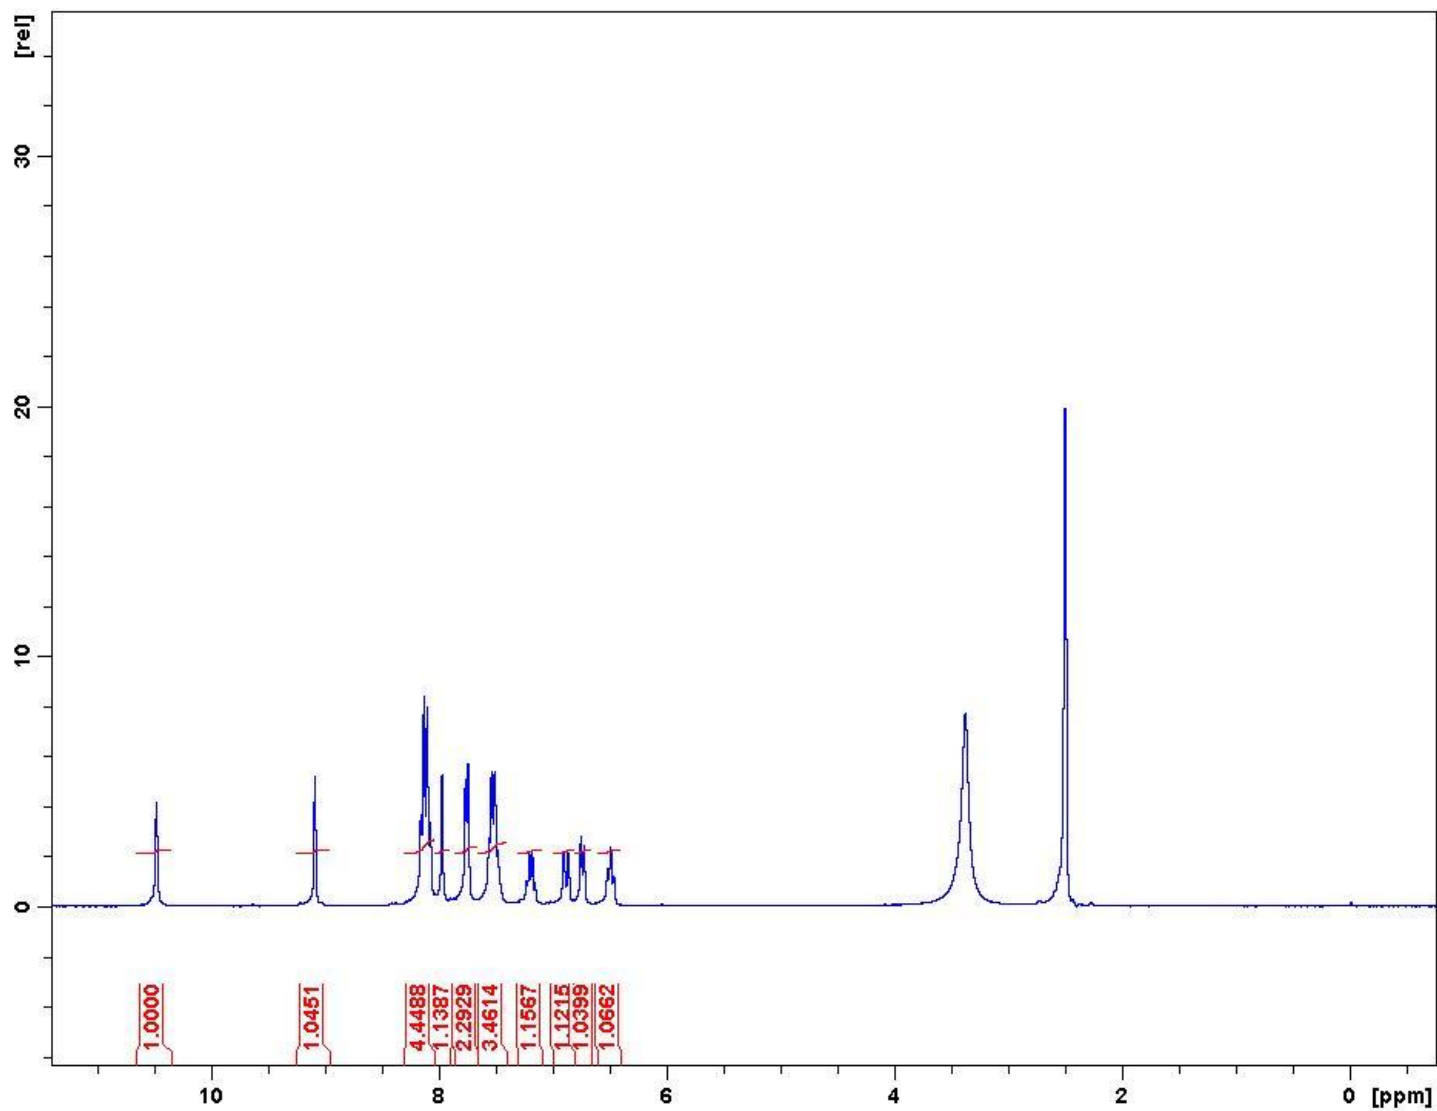



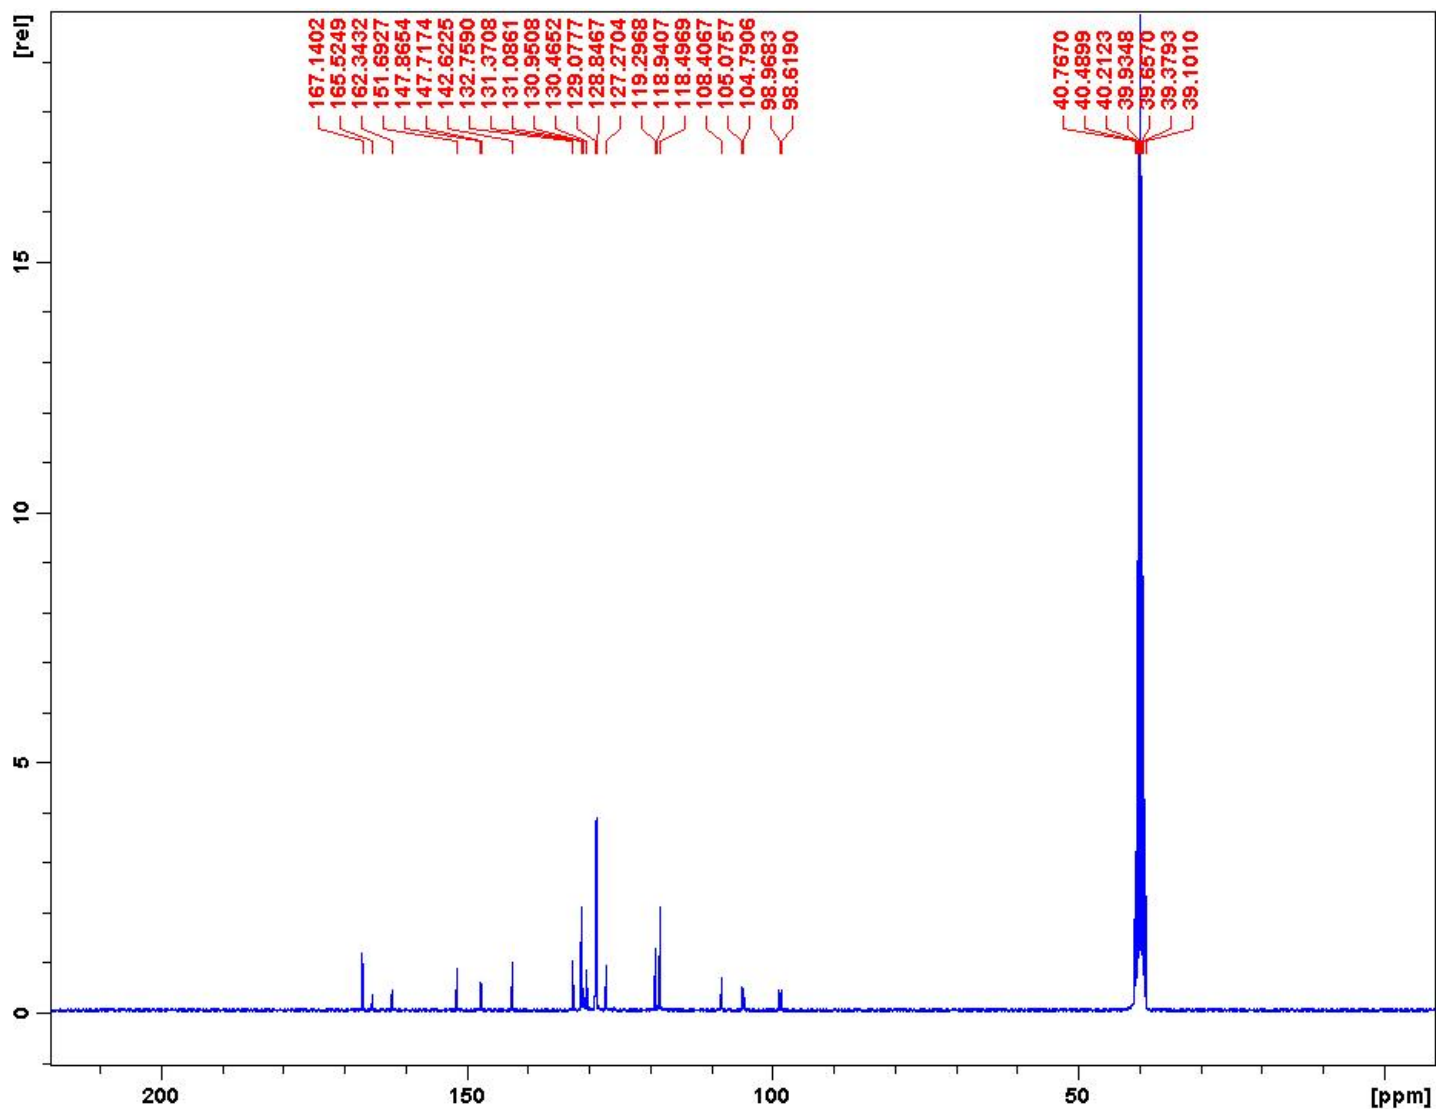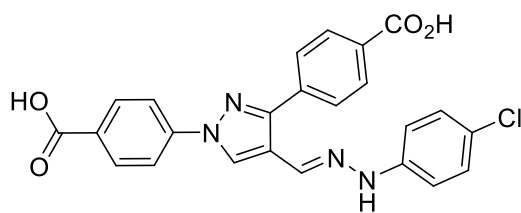

**4,4'-(4-((*E*)-[2-(4-chlorophenyl)hydrazinylidene]methyl)-1*H*-pyrazole-1,3-diyl)dibenzoic acid (18)**

Brownish solid (349 mg, 76%). <sup>1</sup>H NMR, 300 MHz (DMSO-*d*<sub>6</sub>): δ 10.42 (s, 1H), 9.07 (s, 1H), 8.16-8.07 (m, 6H), 7.98 (s, 1H), 7.90 (d, *J* = 8.2 Hz, 2H), 7.22 (d, *J* = 8.7 Hz, 2H), 7.02 (d, *J* = 8.7 Hz, 2H); <sup>13</sup>C NMR (75MHz, DMSO-*d*<sub>6</sub>) δ = 167.5, 167.1, 150.4, 144.6, 142.4, 136.9, 131.3, 131.0, 130.0, 129.8, 129.7, 128.8, 127.5, 122.1, 119.7, 118.6, 113.6.

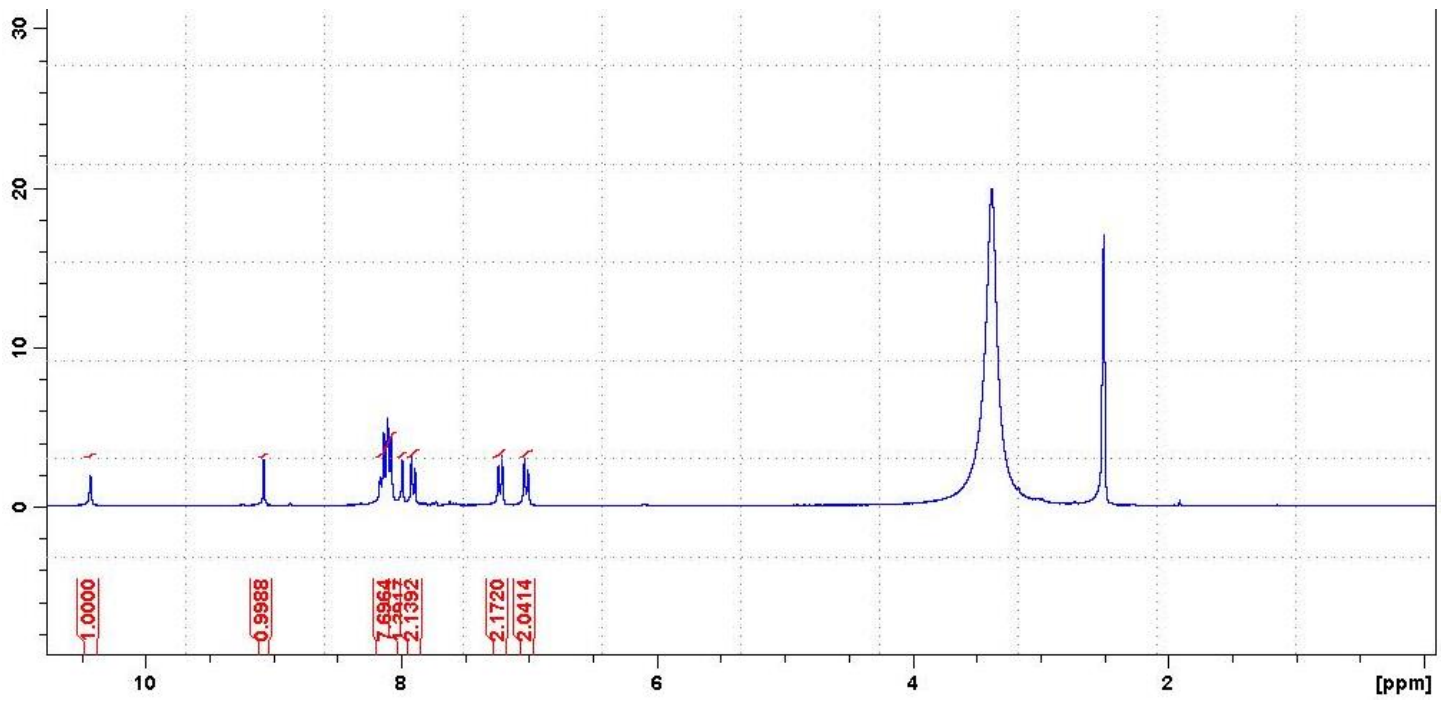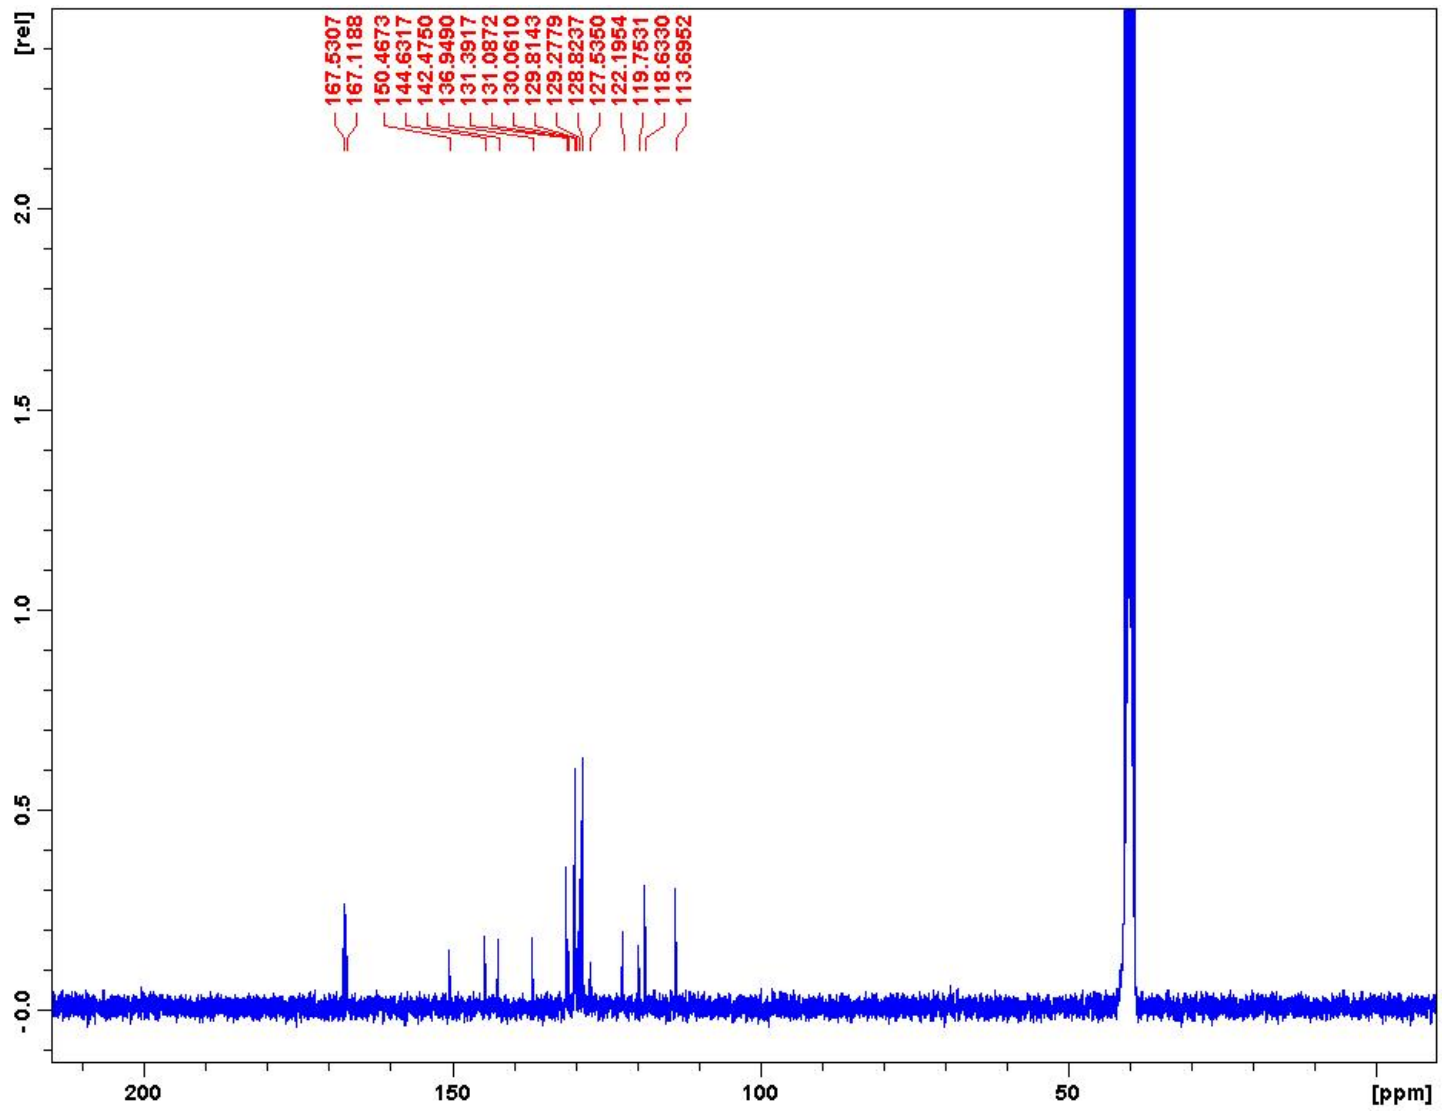

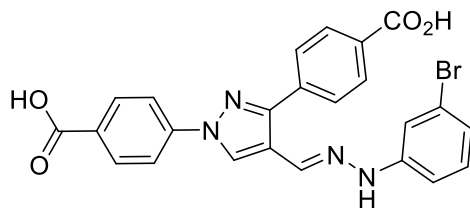

**4,4'-(4-((*E*)-[2-(3-bromophenyl)hydrazinylidene]methyl)-1*H*-pyrazole-1,3-diyl)dibenzoic acid (19)**

Brownish solid (388 mg, 77%). <sup>1</sup>H NMR, 300 MHz (DMSO-*d*<sub>6</sub>): δ 10.47 (s, 1H), 9.22 (s, 1H), 8.15-8.08 (m, 2H), 7.99 (s, 1H), 7.91 (d, *J* = 8.3 Hz, 2H), 7.21-7.20 (m, 1H), 7.11 (t, *J* = 7.9 Hz, 1H), 6.91-6.84 (m, 2H); <sup>13</sup>C NMR (75MHz, DMSO-*d*<sub>6</sub>) δ = 167.5, 167.1, 150.5, 147.2, 142.4, 136.9, 131.3, 131.1, 130.9, 130.5, 130.0, 129.3, 128.9, 127.9, 123.0, 121.2, 119.5, 118.6, 114.3, 111.3.

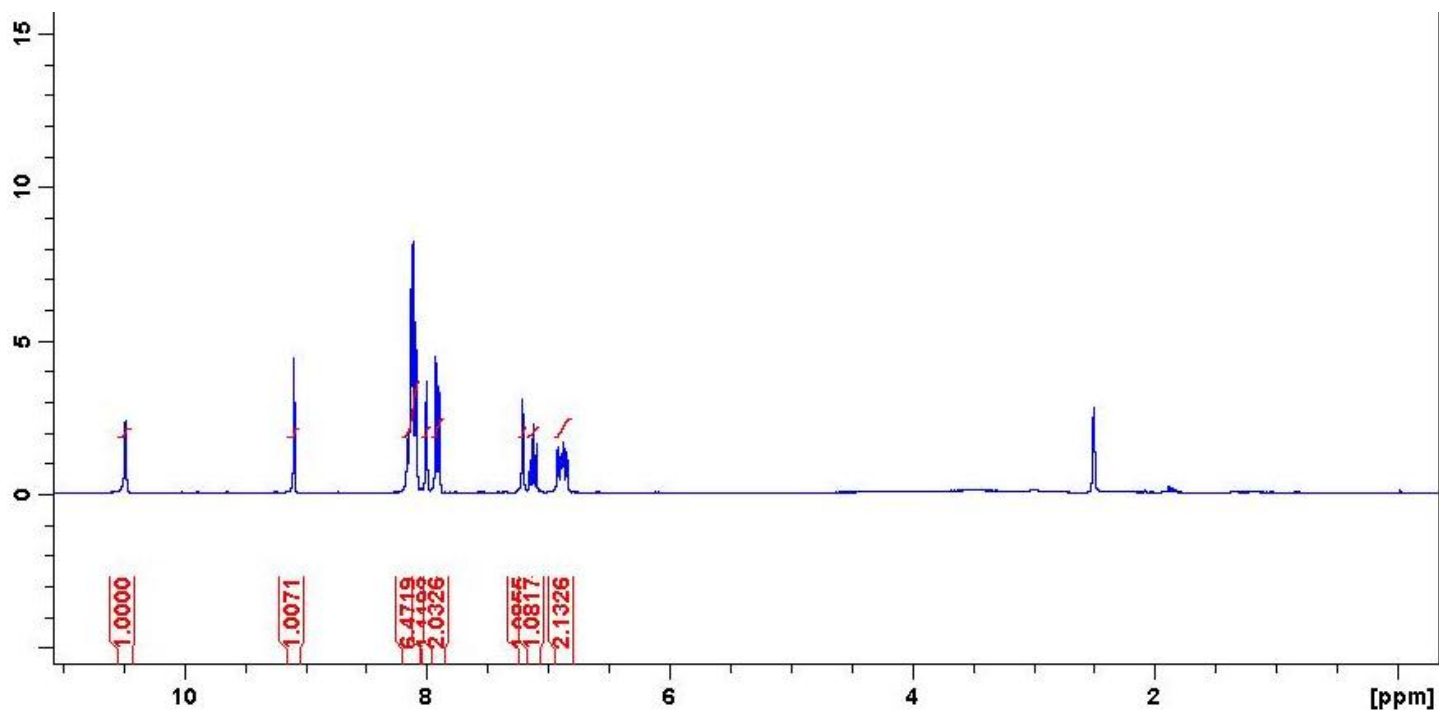

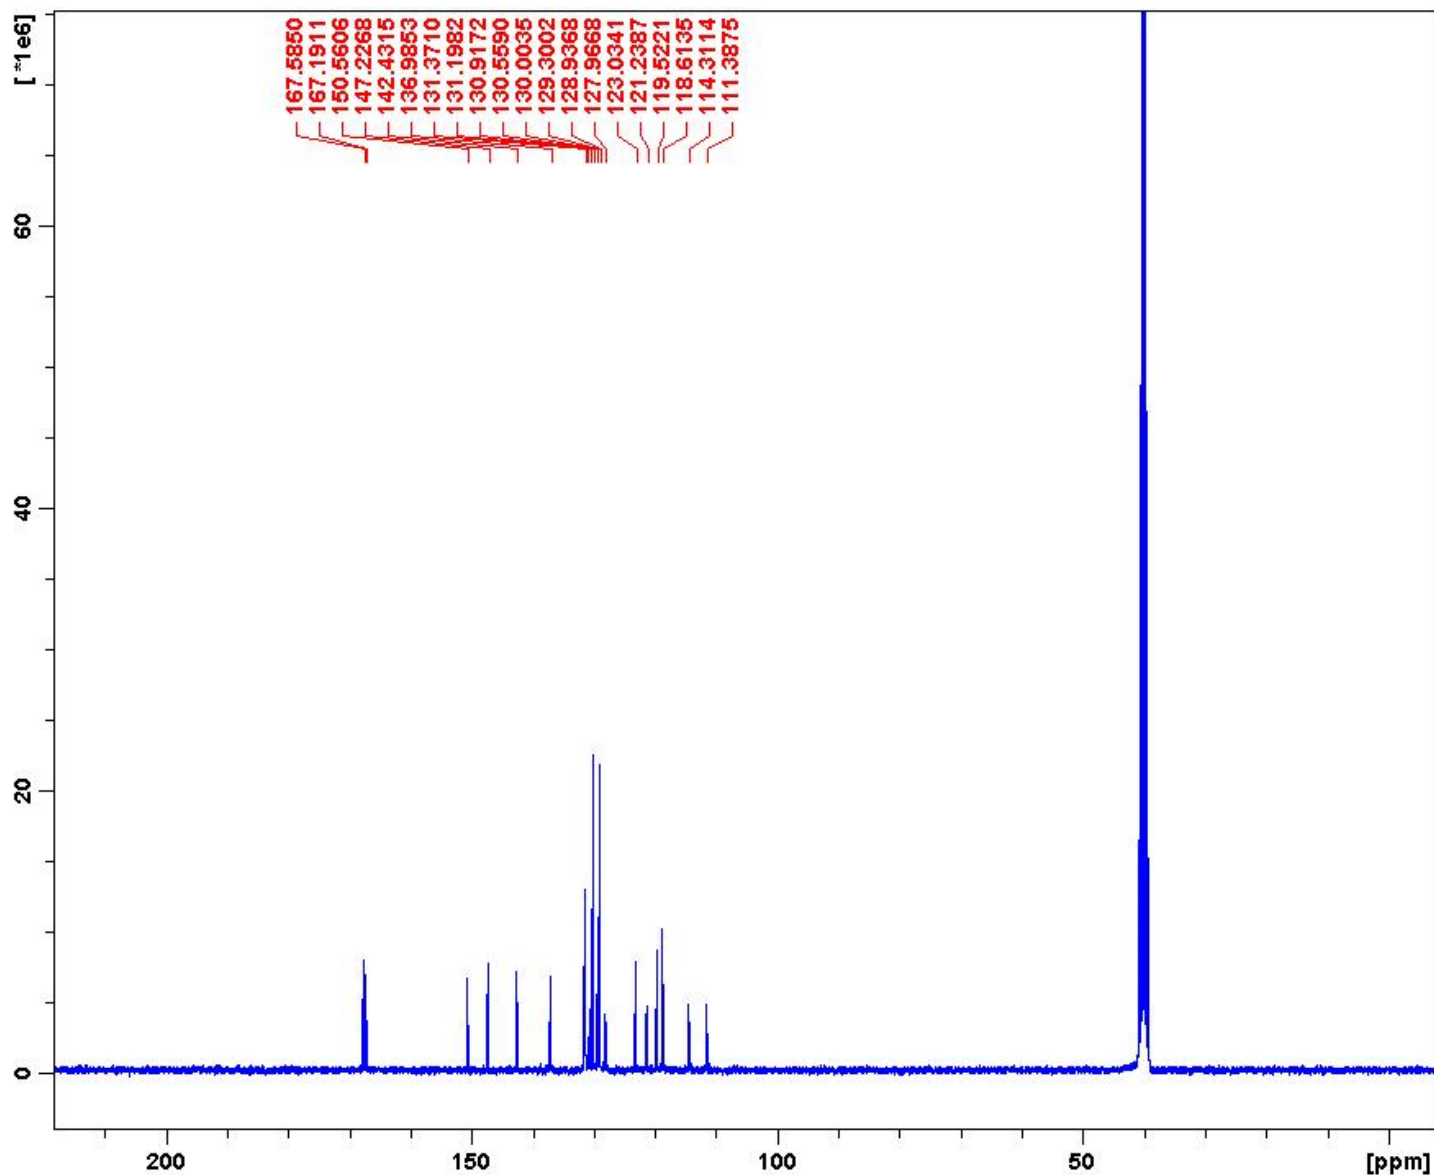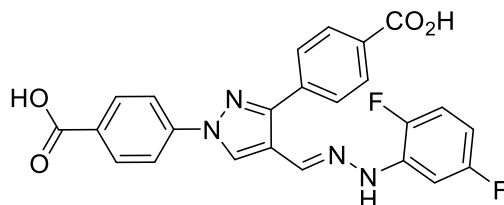

**4,4'-(4-((*E*)-[2-(2,5-difluorophenyl)hydrazinylidene]methyl)-1*H*-pyrazole-1,3-diyl)dibenzoic acid (20)**

Brownish solid (337 mg, 73%).  $^1\text{H}$  NMR, 300 MHz (DMSO- $d_6$ ):  $\delta$  10.42 (s, 1H), 9.18 (s, 1H), 8.33 (s, 1H), 8.17-8.07 (m, 6H), 7.89 (d,  $J = 8.2$  Hz, 2H), 7.25-7.10 (m, 2H), 6.52-6.47 (m, 1H);  $^{13}\text{C}$  NMR (75MHz, DMSO- $d_6$ )  $\delta = 167.5, 167.1, 160.1$  ( $^1J_{\text{C-F}} = 236.4$  Hz), 150.6, 145.5 (d,  $J = 234.9$  Hz), 142.4, 136.8, 135.3-135.1 (m), 133.2, 131.3, 131.1, 130.0, 129.3, 128.8, 127.9, 119.4, 118.6, 118.6-116.1 (m), 104.0 ( $^{2,3}J_{\text{C-F}} = 25.0, 7.5$  Hz), 100.8 ( $^2J_{\text{C-F}} = 30.4$  Hz).

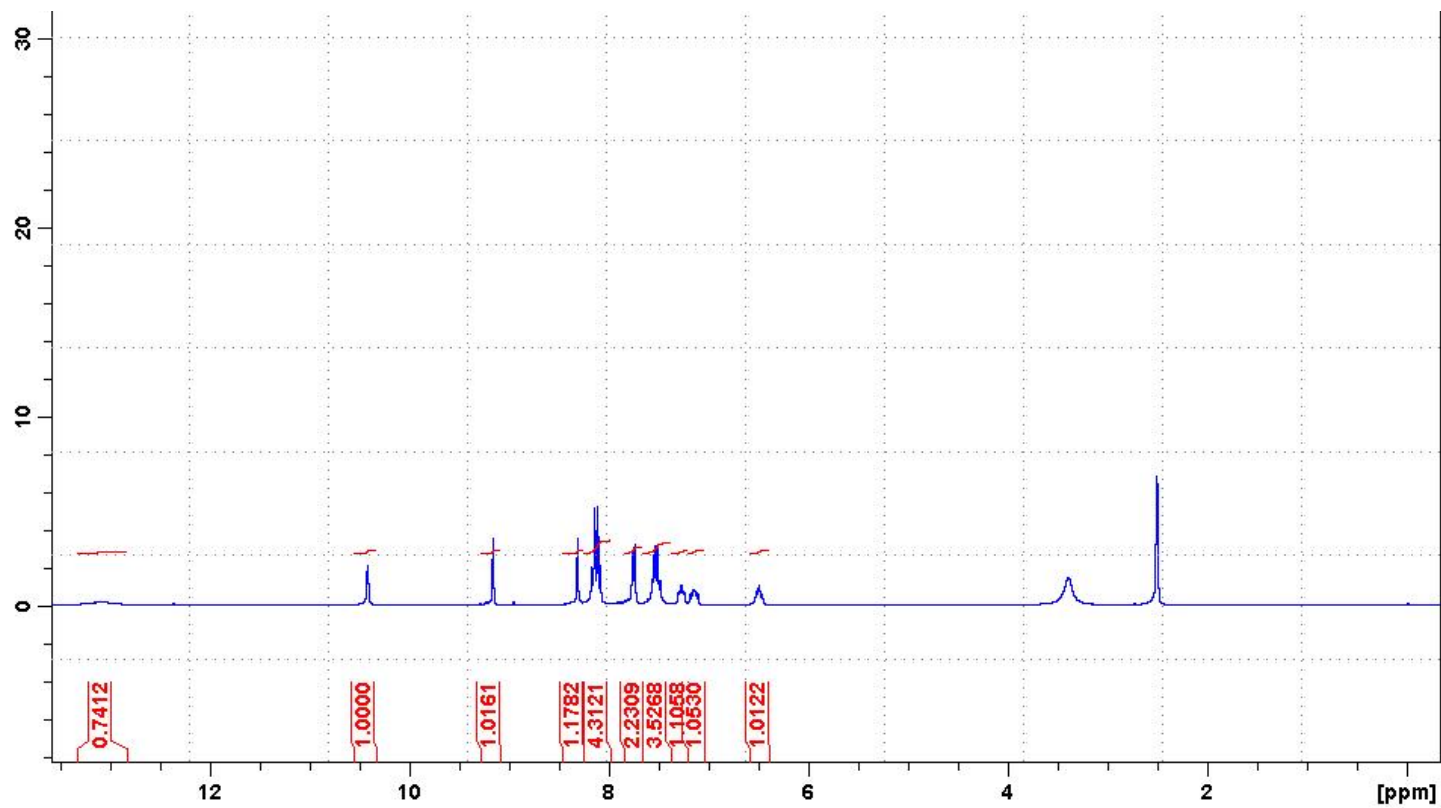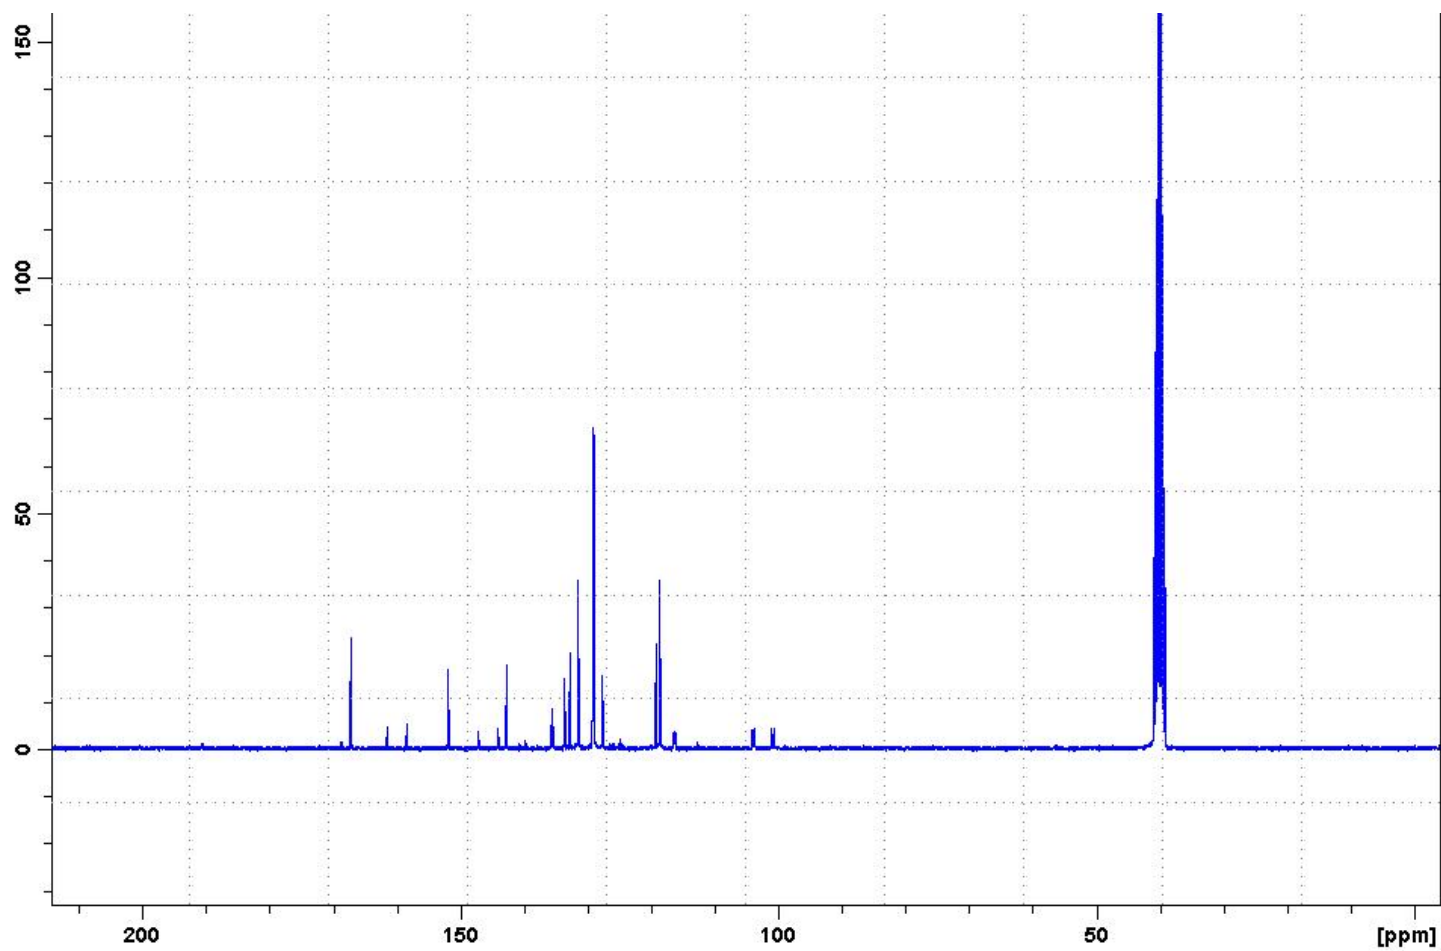

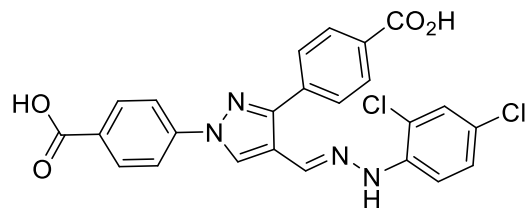

**4,4'-(4-((*E*)-[2-(2,4-dichlorophenyl)hydrazinylidene]methyl)-1*H*-pyrazole-1,3-diyl)dibenzoic acid (21)**

Brownish solid (376 mg, 76%). <sup>1</sup>H NMR, 300 MHz (DMSO-*d*<sub>6</sub>): δ 10.04 (s, 1H), 9.11 (s, 1H), 8.47 (s, 1H), 8.16-8.08 (m, 6H), 7.88 (d, *J* = 8.1 Hz, 2H), 7.54 (d, *J* = 8.8 Hz, 1H), 7.43 (d, *J* = 2.0 Hz, 1H), 7.25 (d, *J* = 8.8 Hz, 1H); <sup>13</sup>C NMR (75MHz, DMSO-*d*<sub>6</sub>) δ = 167.5, 167.1, 150.7, 142.4, 141.0, 136.7, 133.7, 131.3, 131.1, 130.0, 129.3, 128.9, 128.7, 128.2, 127.6, 122.3, 119.5, 118.6, 116.7, 115.3.

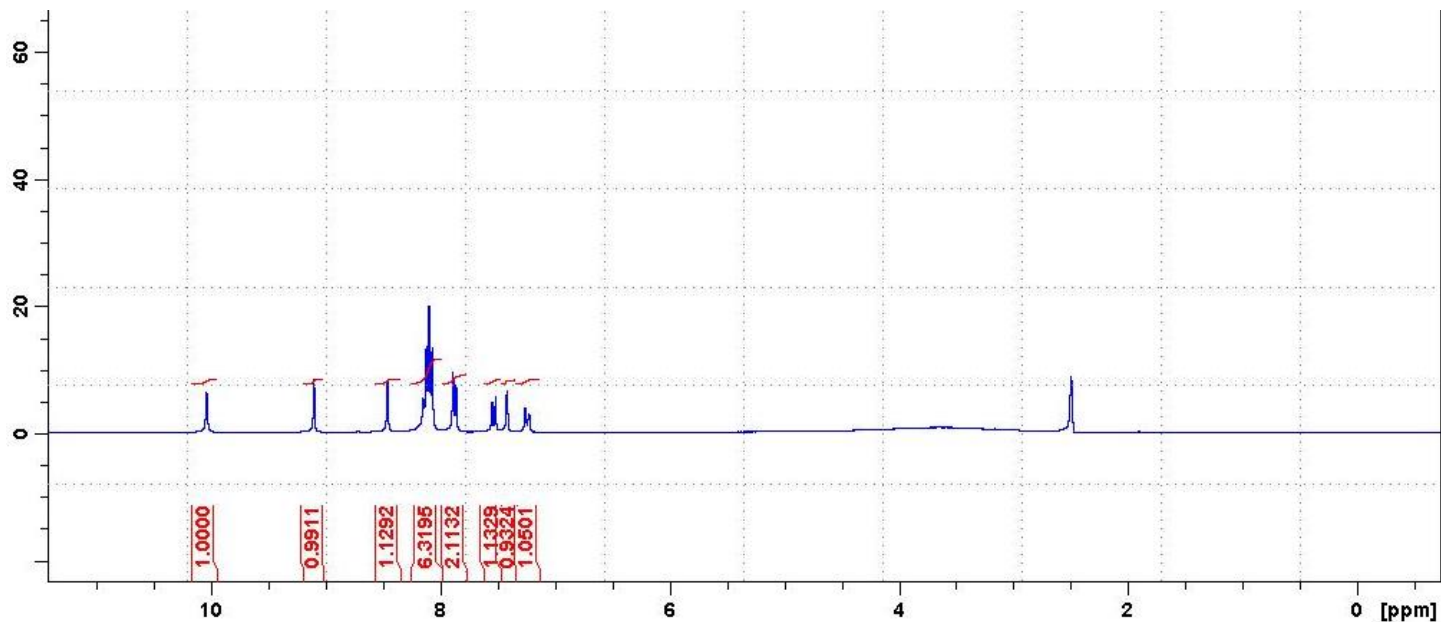

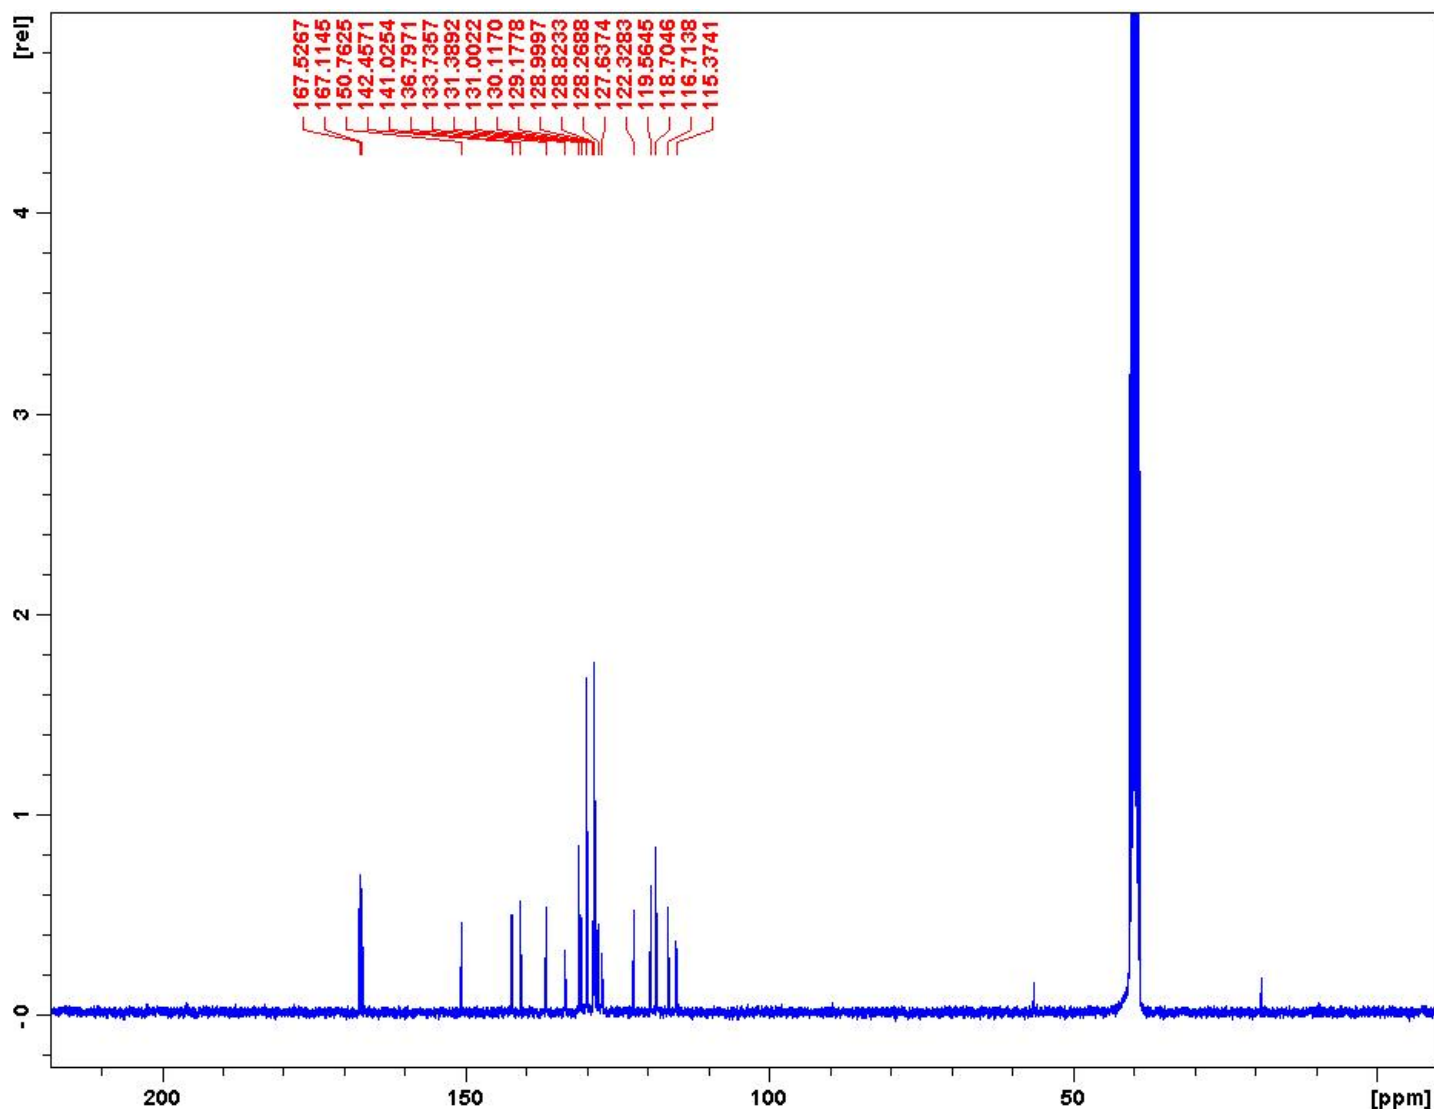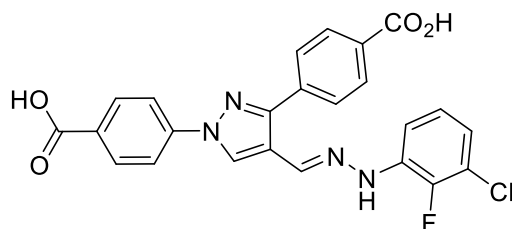

**4-[1-(4-carboxyphenyl)-4-[(E)-[(3-chloro-2-fluoro-phenyl)hydrazono]methyl]pyrazol-3-yl]benzoic acid (22)**

Brownish solid (358 mg, 75%).  $^1\text{H}$  NMR, 300 MHz (DMSO- $d_6$ ):  $\delta$  10.40 (s, 1H), 9.09 (s, 1H), 8.32 (s, 1H), 8.11-8.07 (m, 6H), 7.88 (s,  $J = 7.8$  Hz, 2H), 7.43 (t,  $J = 7.6$  Hz, 1H), 7.05 (t,  $J = 7.7$  Hz, 1H), 6.85 (t,  $J = 6.4$  Hz, 1H);  $^{13}\text{C}$  NMR (75MHz, DMSO- $d_6$ )  $\delta = 167.5, 167.1, 150.6, 144.7$  (d,  $^1J = 235.8$  Hz), 142.4, 136.8, 135.3 (d,  $^3J = 9.2$ ), 133.2, 131.3, 131.1, 130.0, 129.3, 128.8, 127.7, 125.8 (d,  $J = 3.5$  Hz), 119.9 (d,  $^2J = 14.2$  Hz), 119.4, 118.8, 118.6, 113.0.

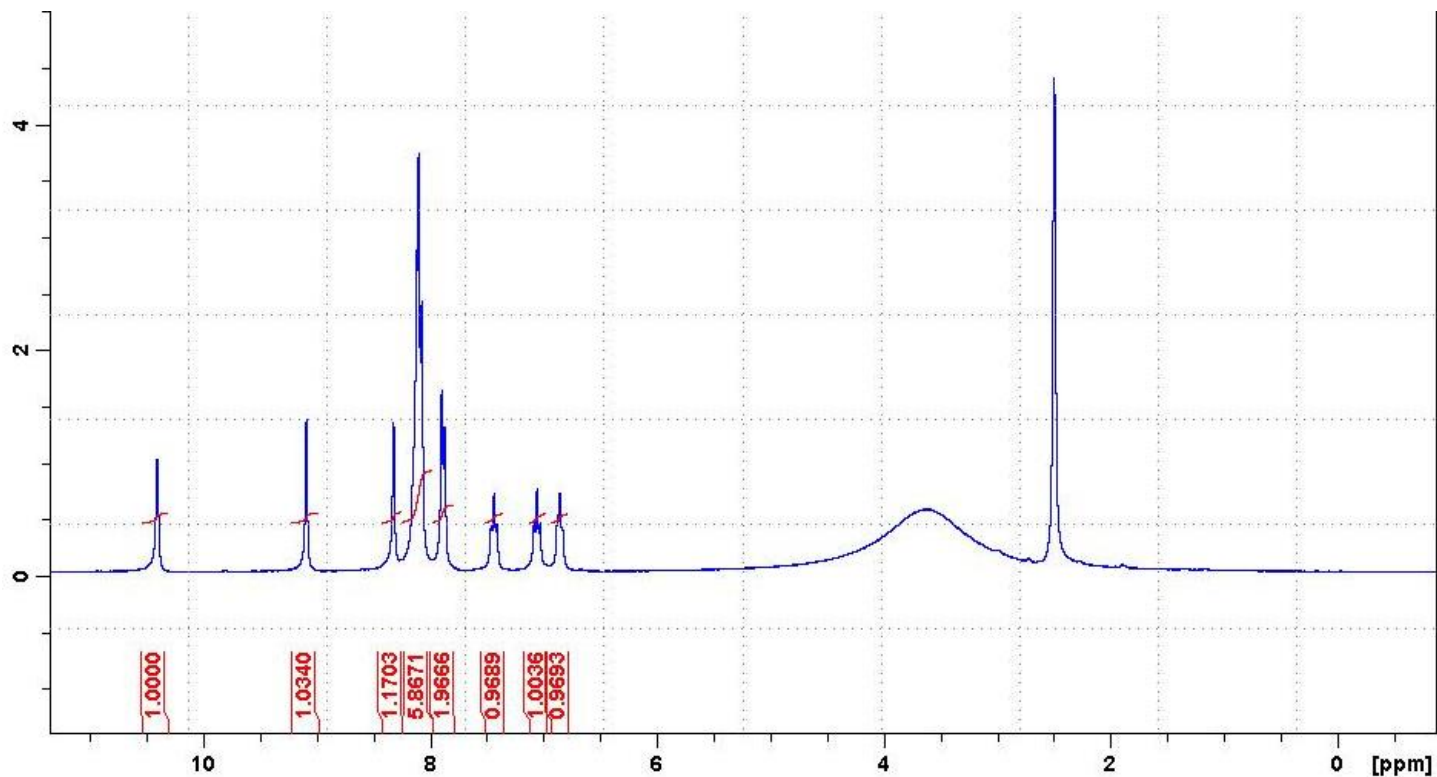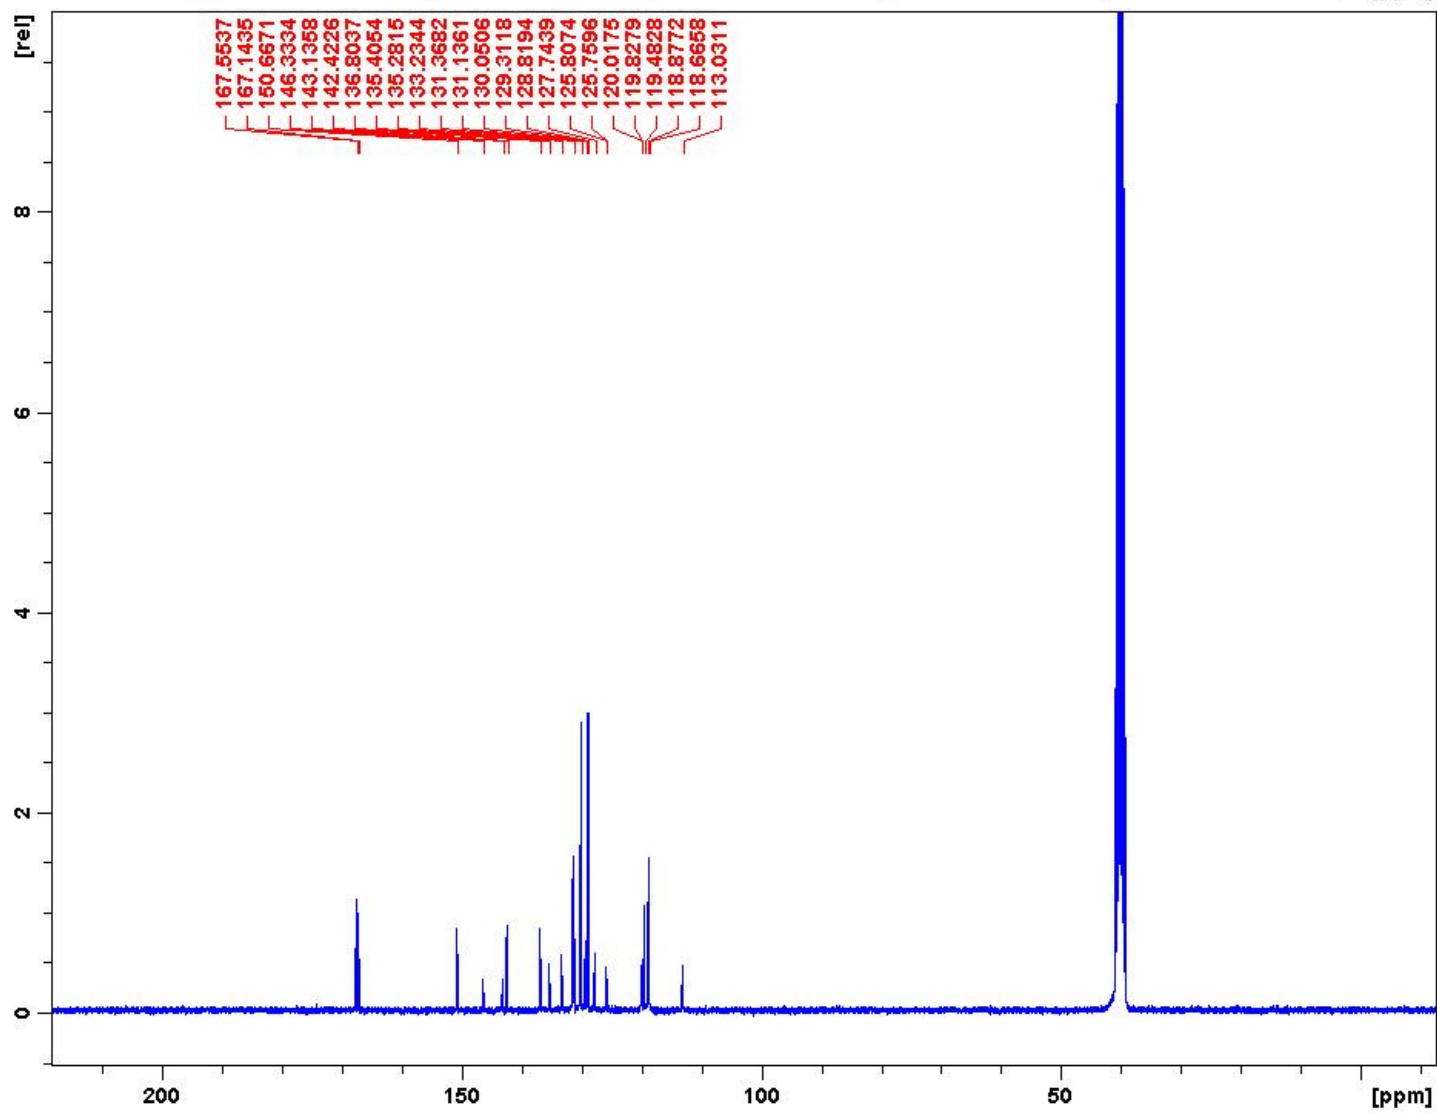



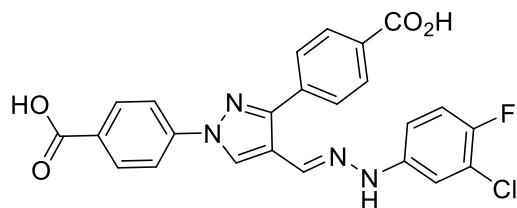

**4,4'-(4-((*E*)-[2-(3-chloro-4-fluorophenyl)hydrazinylidene]methyl)-1*H*-pyrazole-1,3-diyl)dibenzoic acid (23)**

Brownish solid (368 mg, 77%).  $^1\text{H}$  NMR, 300 MHz (DMSO- $d_6$ ):  $\delta$  10.83 (br s, 1H), 9.05 (s, 1H), 8.10-8.98 (m, 7H), 7.81 (d,  $J = 8.1$  Hz, 2H), 7.25-7.19 (m, 2H), 6.98-6.94 (m, 1H);  $^{13}\text{C}$  NMR (75MHz, DMSO- $d_6$ )  $\delta = 168.8, 168.4, 150.7, 151.1$  ( $^1J_{\text{C-F}} = 234.6$  Hz),  $150.7, 143.4, 141.2, 135.8, 135.1, 134.0, 131.0, 129.9, 128.2, 127.1, 120.3$  ( $^2J_{\text{C-F}} = 18.2$  Hz),  $119.2, 118.1, 117.6$  ( $^2J_{\text{C-F}} = 22.1$  Hz),  $112.6, 111.9$ .

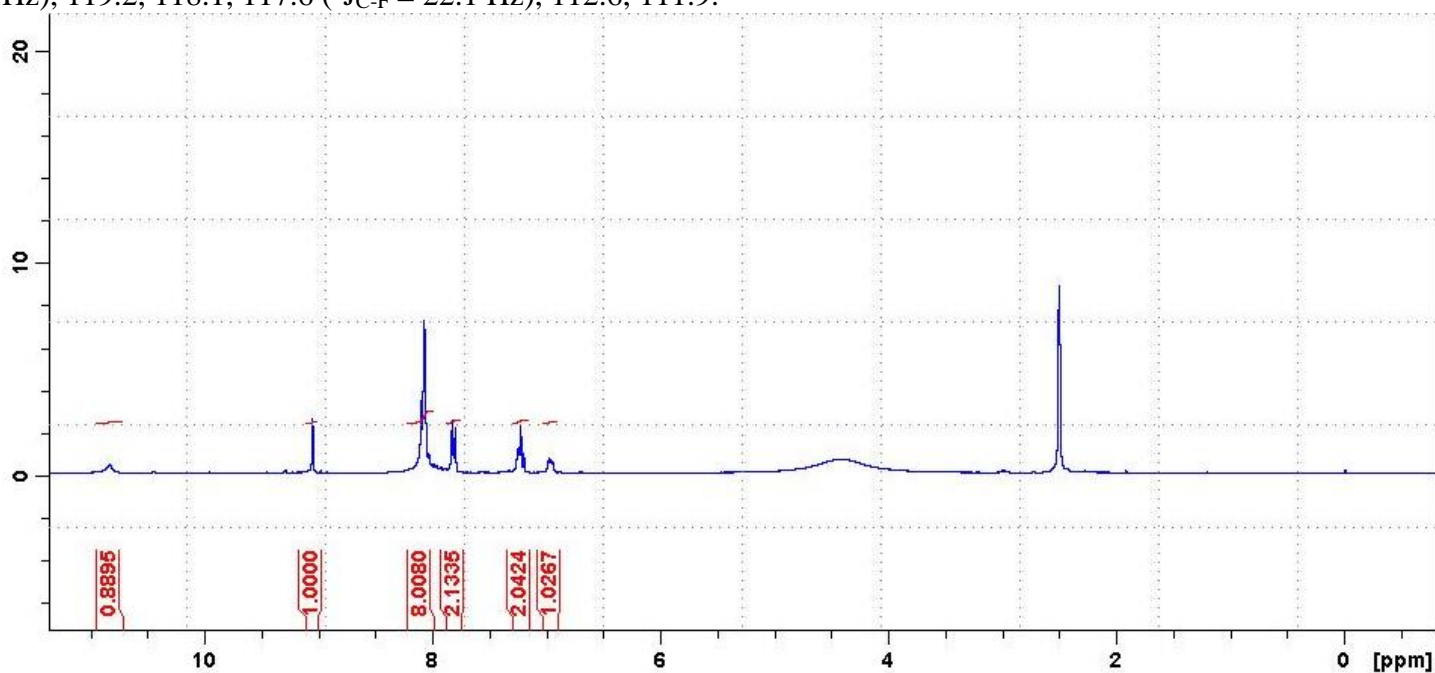

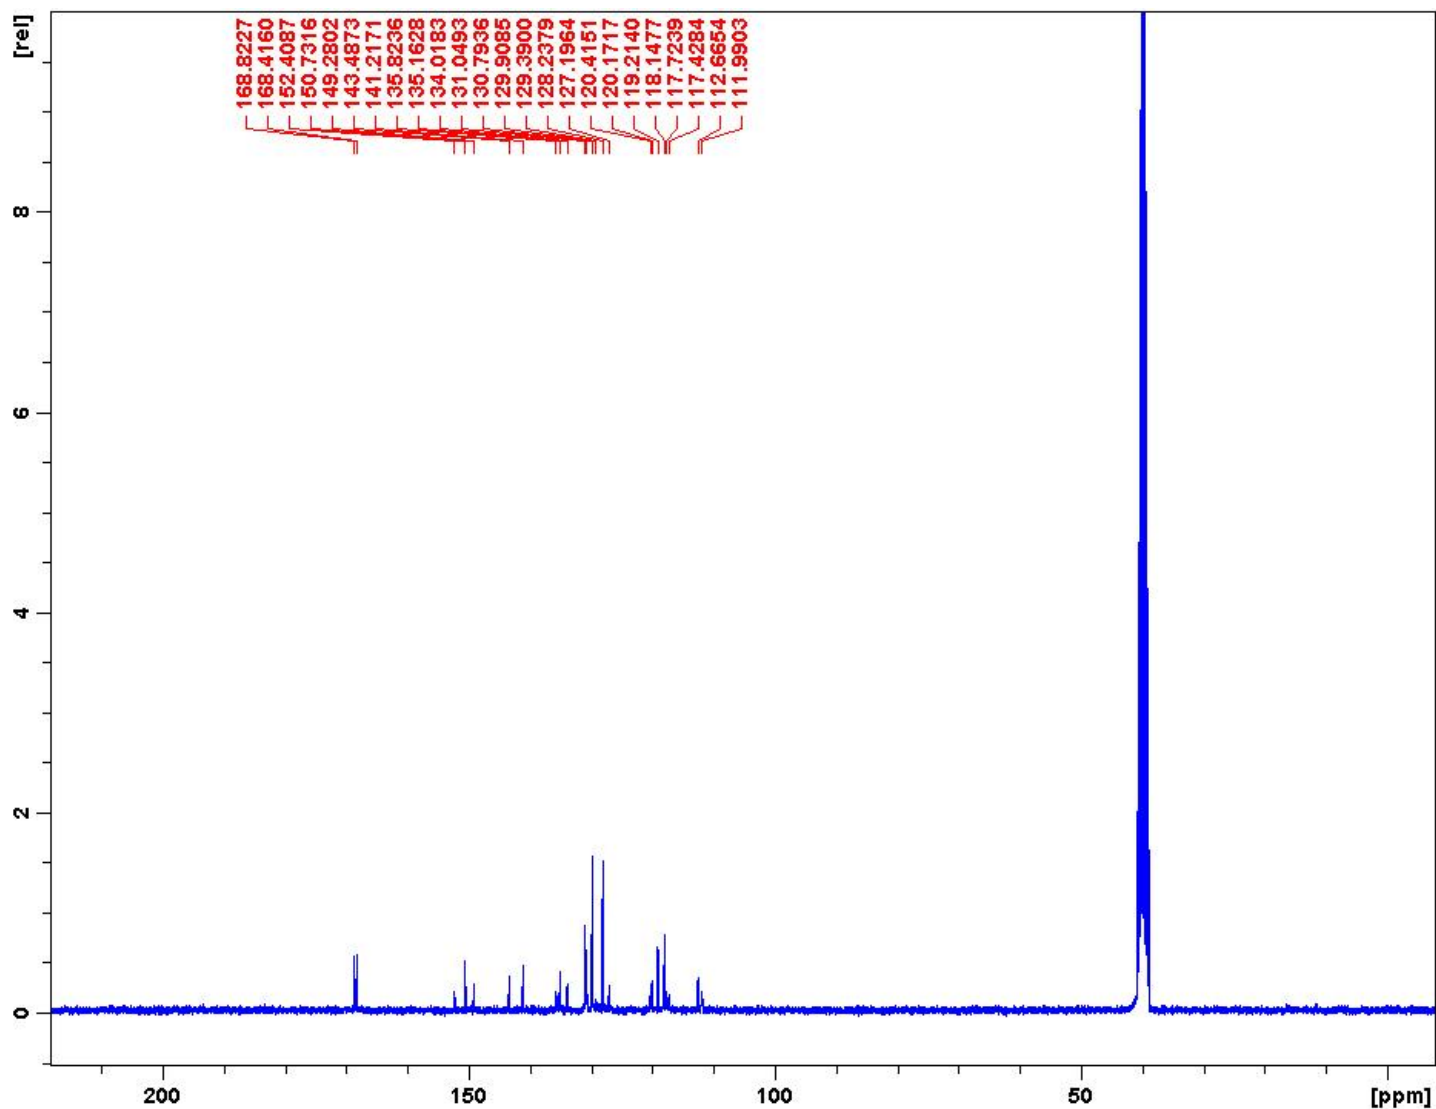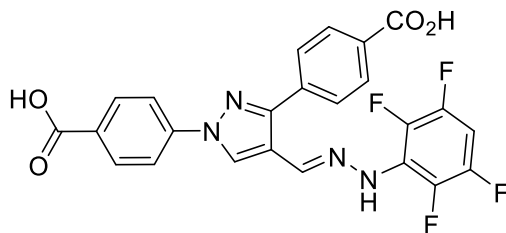

**4,4'-(4-{(E)-[2-(2,3,5,6-tetrafluorophenyl)hydrazinylidene]methyl}-1H-pyrazole-1,3-diyl)dibenzoic acid (24)**

Brownish solid (398 mg, 80%).  $^1\text{H}$  NMR, 300 MHz (DMSO- $d_6$ ):  $\delta$  10.38 (s, 1H), 8.81 (s, 1H), 8.36 (s, 1H), 8.05-7.98 (m, 6H), 7.81 (d,  $J = 6.9$  Hz, 2H), 7.25-7.13 (m, 1H);  $^{13}\text{C}$  NMR (75MHz, DMSO- $d_6$ )  $\delta = 168.4, 168.1, 157.5, 151.0, 140.9, 138.5, 136.1, 135.8, 134.7, 131.0, 129.8, 128.2, 127.2, 118.3, 95.7$  ( $^2J_{\text{C-F}} = 25.0$  Hz).

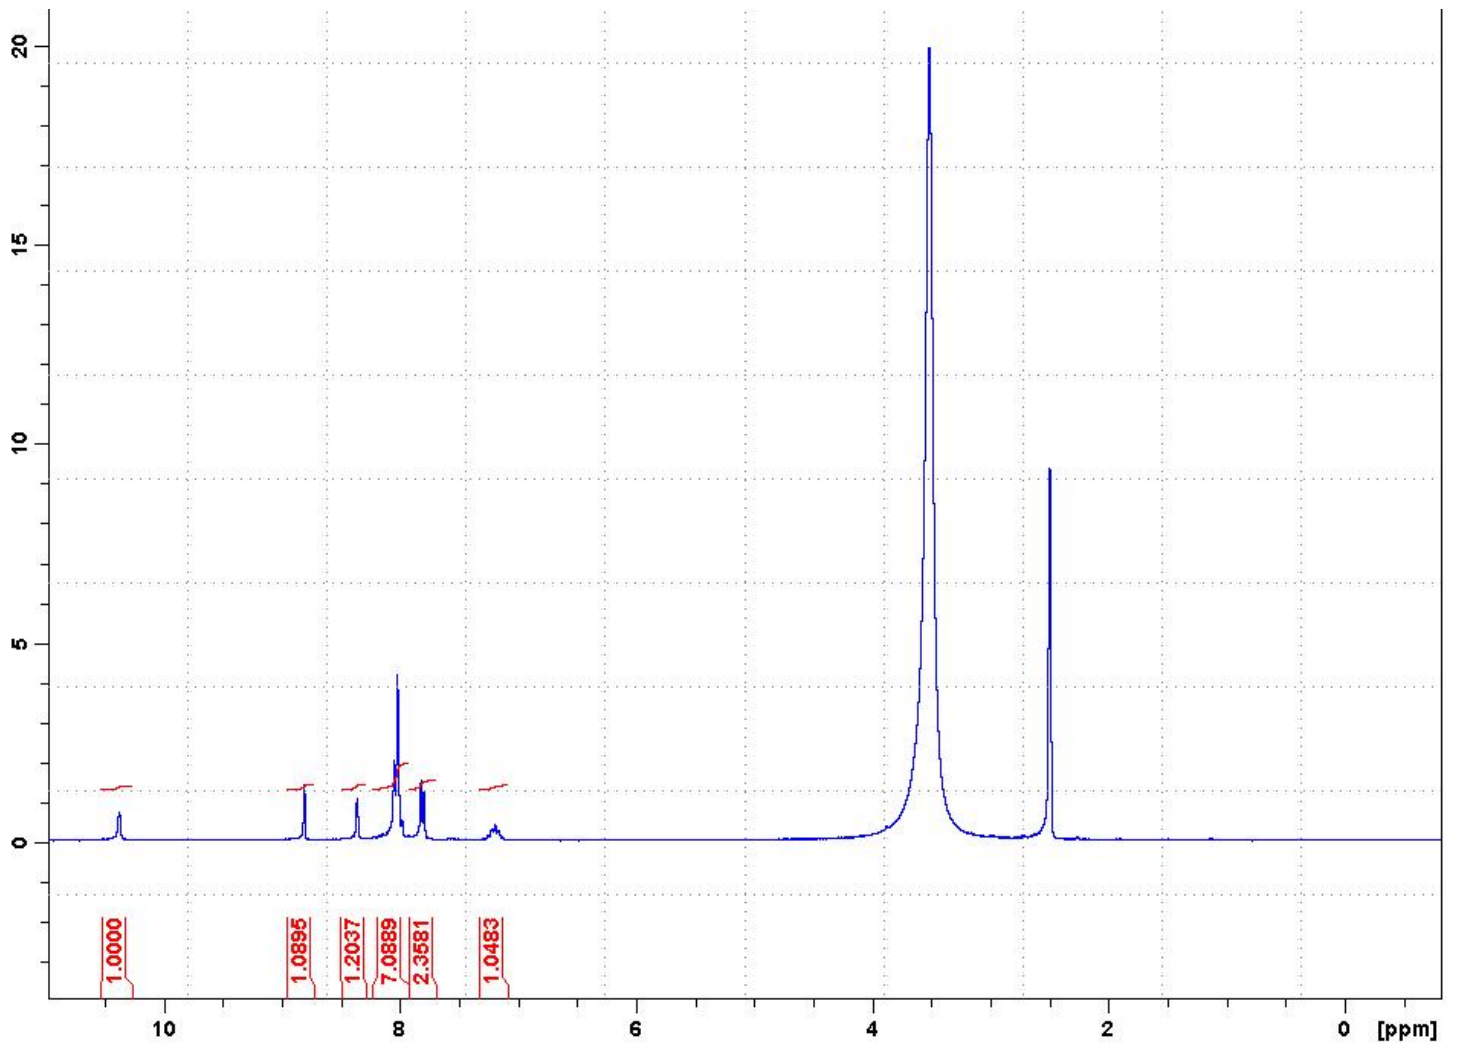

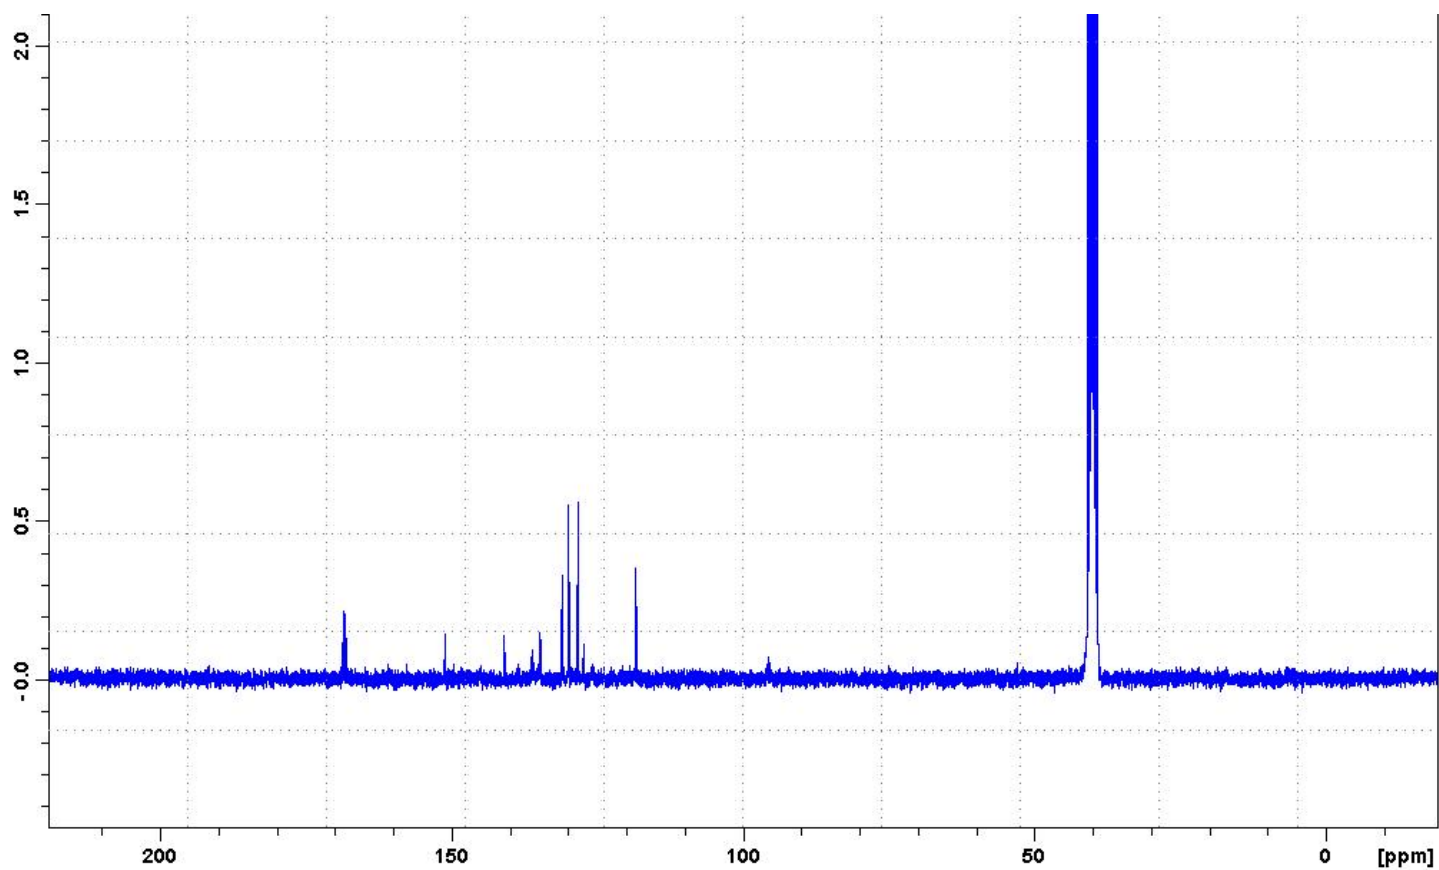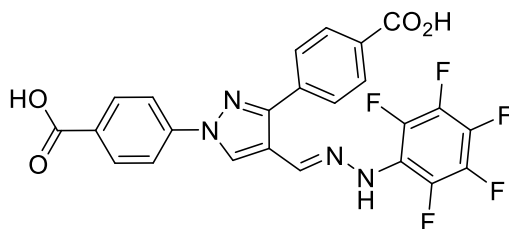

**4,4'-(4-((*E*)-[2-(2,3,4,5,6-pentafluorophenyl)hydrazinylidene]methyl)-1*H*-pyrazole-1,3-diyl)dibenzoic acid (25)**  
 Brownish solid (423 mg, 82%). <sup>1</sup>H NMR, 300 MHz (DMSO-*d*<sub>6</sub>): δ 10.13 (br s, 1H), 8.72 (s, 1H), 8.21 (s, 1H), 8.01 (s, 7H), 7.84-7.81 (m, 2H); <sup>13</sup>C NMR (75 MHz, DMSO-*d*<sub>6</sub>) δ = 167.6, 167.2, 150.5, 142.1, 139.9-139.7 (m), 138.9, 136.4, 135.5, 135.3, 131.2, 129.8, 129.6-129.2 (m), 129.4, 128.6, 127.4, 121.6, 118.7, 118.5.

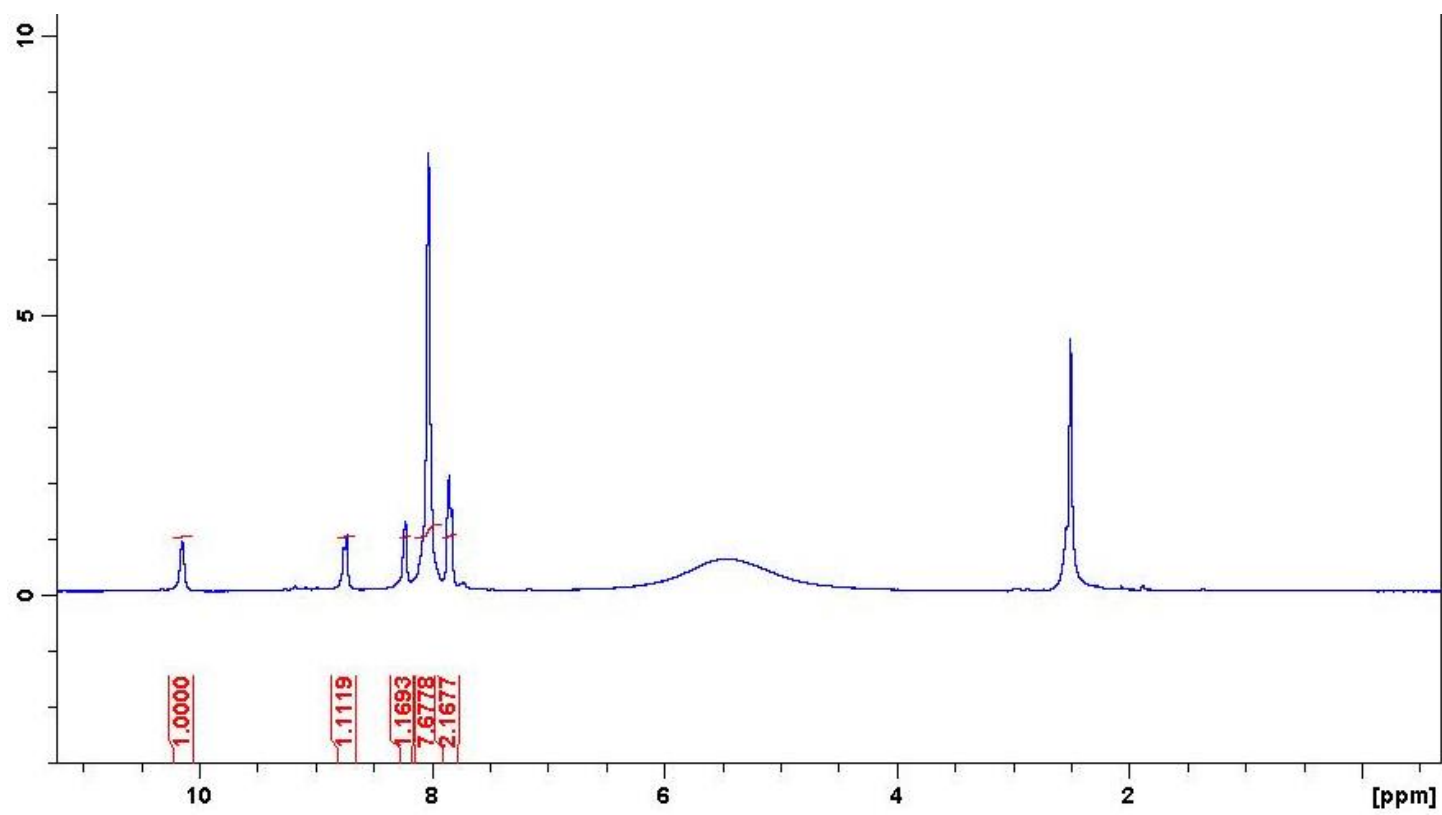

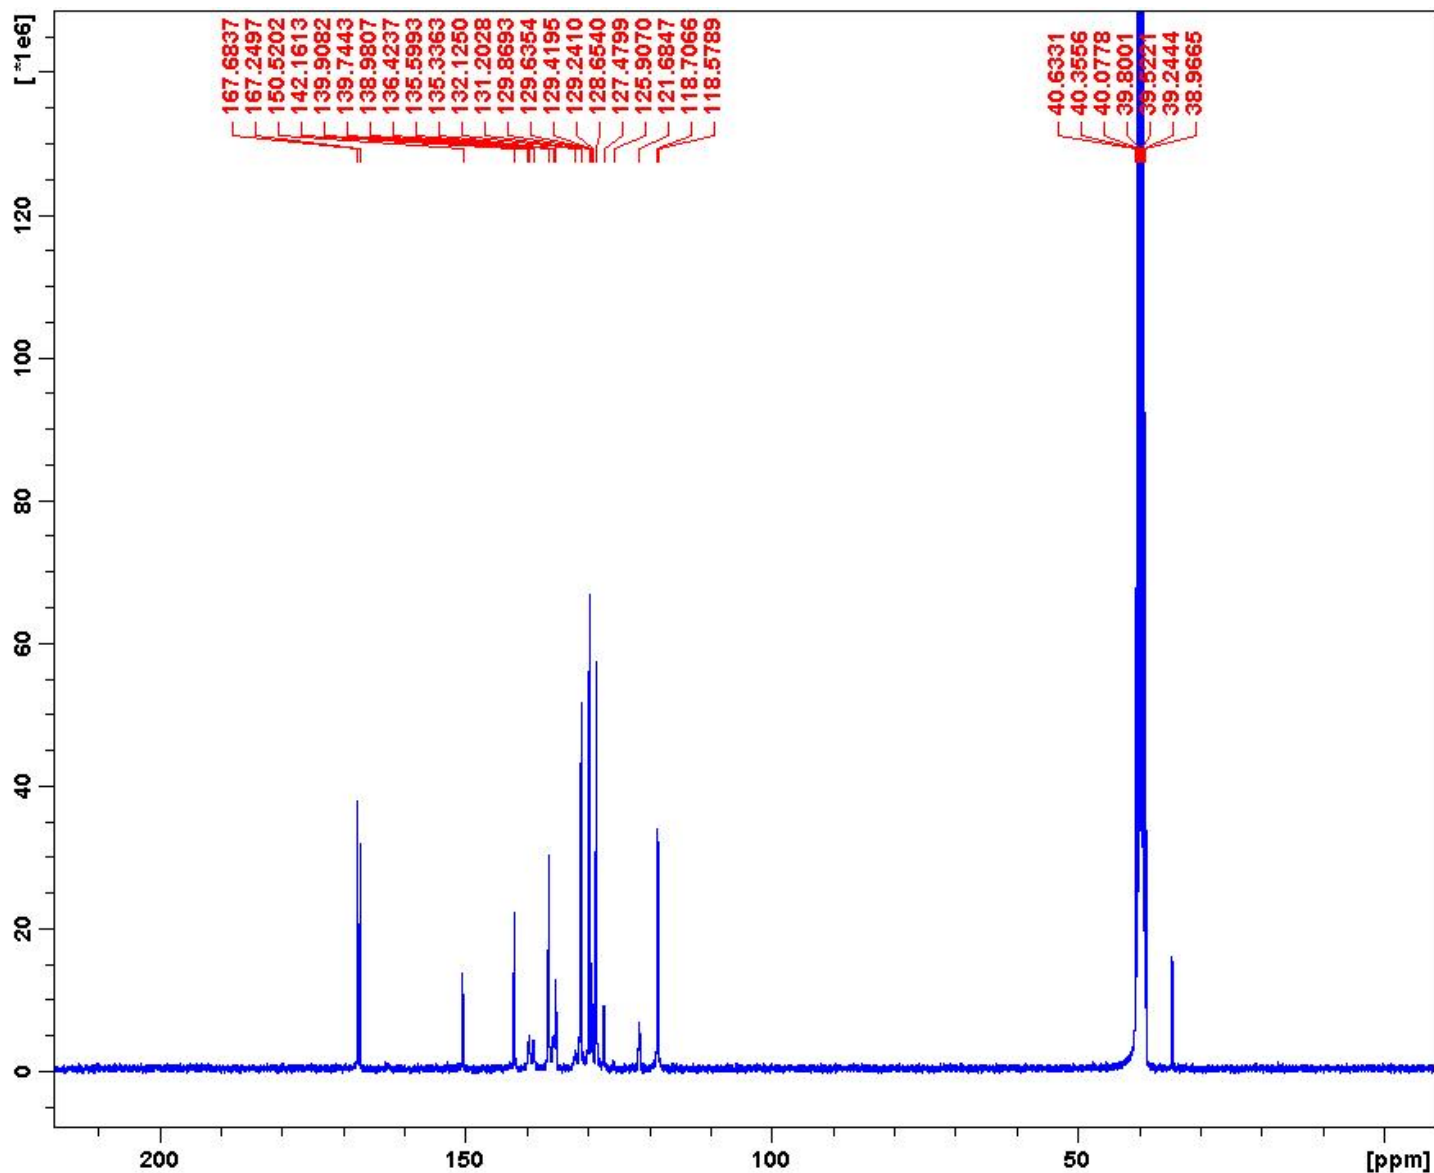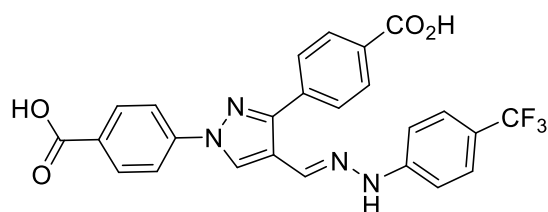

**4,4'-(4-{(E)-[2-(4-trifluoromethylphenyl)hydrazinylidene]methyl}-1H-pyrazole-1,3-diyl)dibenzoic acid (26)**

Brownish solid (370 mg, 75%).  $^1\text{H}$  NMR, 300 MHz (DMSO- $d_6$ ):  $\delta$  10.78 (s, 1H), 9.07 (s, 1H), 8.14-8.07 (m, 8H), 7.90 (d,  $J$  = 8.3 Hz, 2H), 7.48 (d,  $J$  = 8.6 Hz, 2H), 7.13 (d,  $J$  = 8.5 Hz, 2H);  $^{13}\text{C}$  NMR (75 MHz, DMSO- $d_6$ )  $\delta$  = 167.5, 167.1, 150.6, 148.6, 142.4, 136.8, 131.5, 131.3, 131.0, 130.0, 129.1, 128.8, 127.8, 126.7, 123.6, 119.4, 118.6, 111.8.

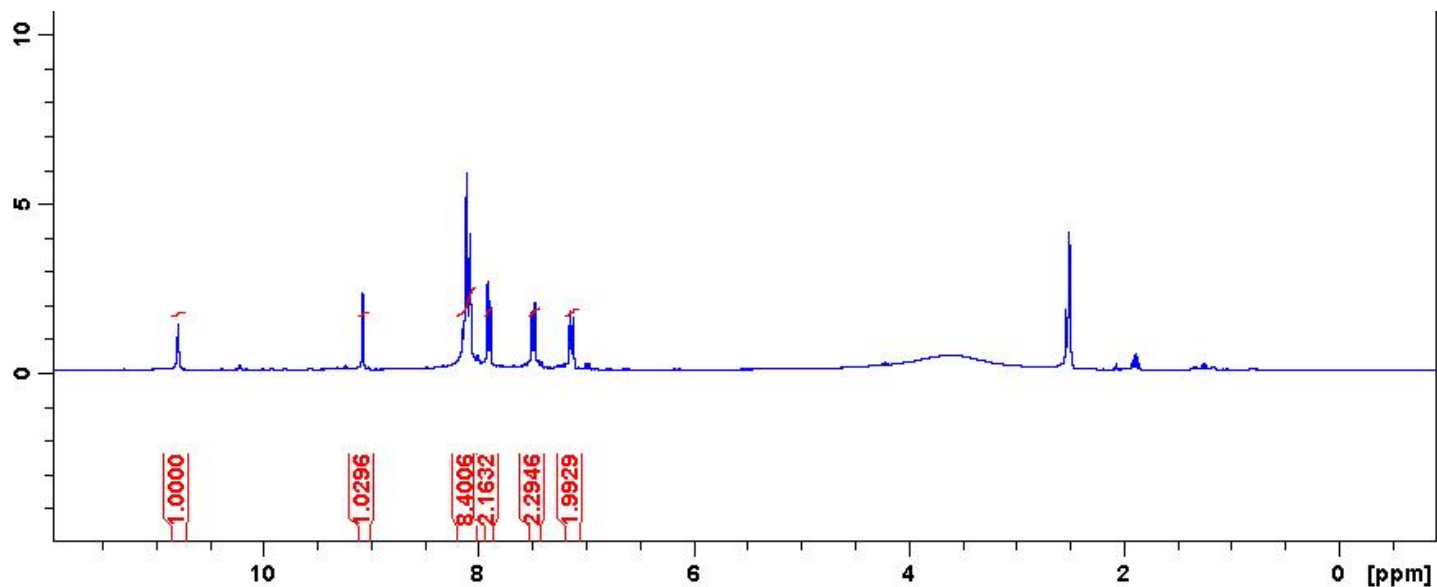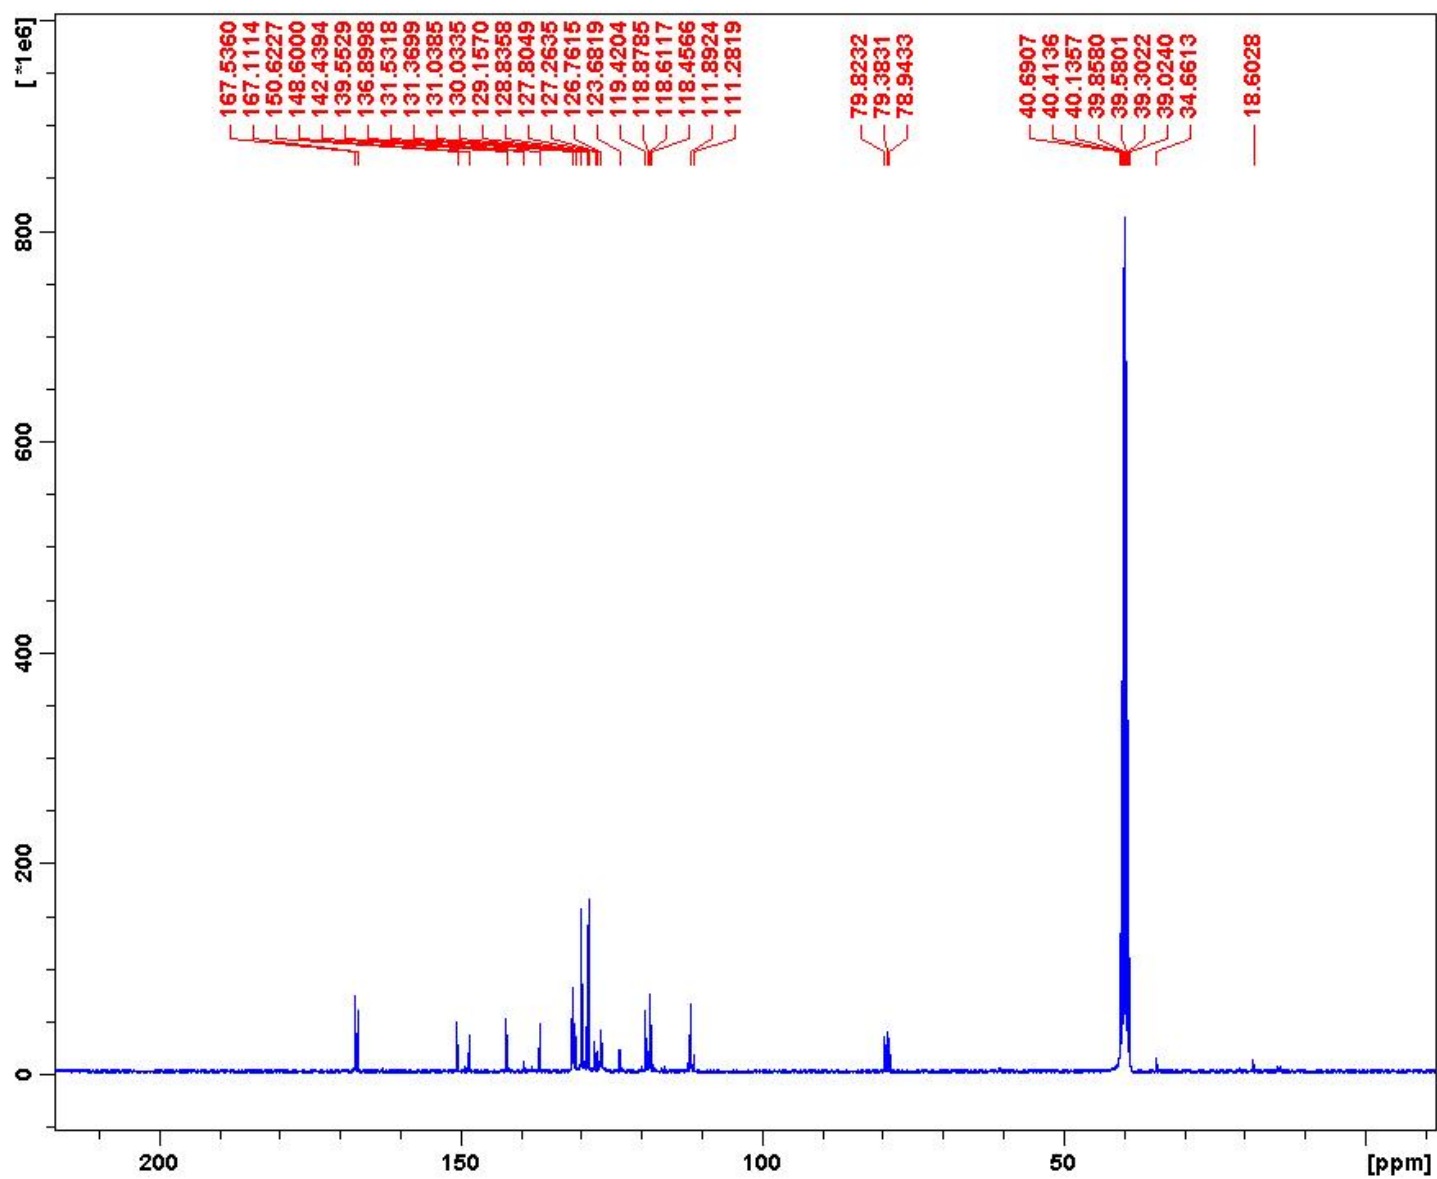

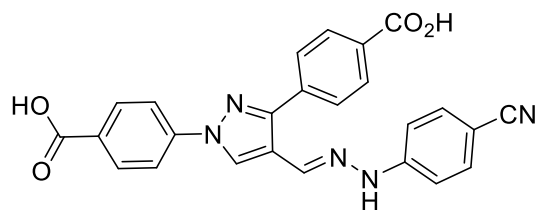

**4-[1-(4-carboxyphenyl)-4-[(E)-[(4-cyanophenyl)hydrazono]methyl]pyrazol-3-yl]benzoic acid (27)**

Brownish solid (342 mg, 76%).  $^1\text{H}$  NMR, 300 MHz (DMSO- $d_6$ ):  $\delta$  10.92 (s, 1H), 9.12 (s, 1H), 8.16-8.07 (m, 8H), 7.90 (d,  $J = 8.3$  Hz, 2H), 7.59 (d,  $J = 8.7$  Hz, 2H), 7.10 (d,  $J = 8.6$  Hz, 2H);  $^{13}\text{C}$  NMR (75 MHz, DMSO- $d_6$ )  $\delta = 167.4, 167.0, 150.7, 148.9, 142.4, 136.8, 134.0, 132.6, 131.4, 131.1, 130.0, 129.2, 128.8, 128.0, 120.5, 119.2, 118.7, 112.4, 99.5$ .

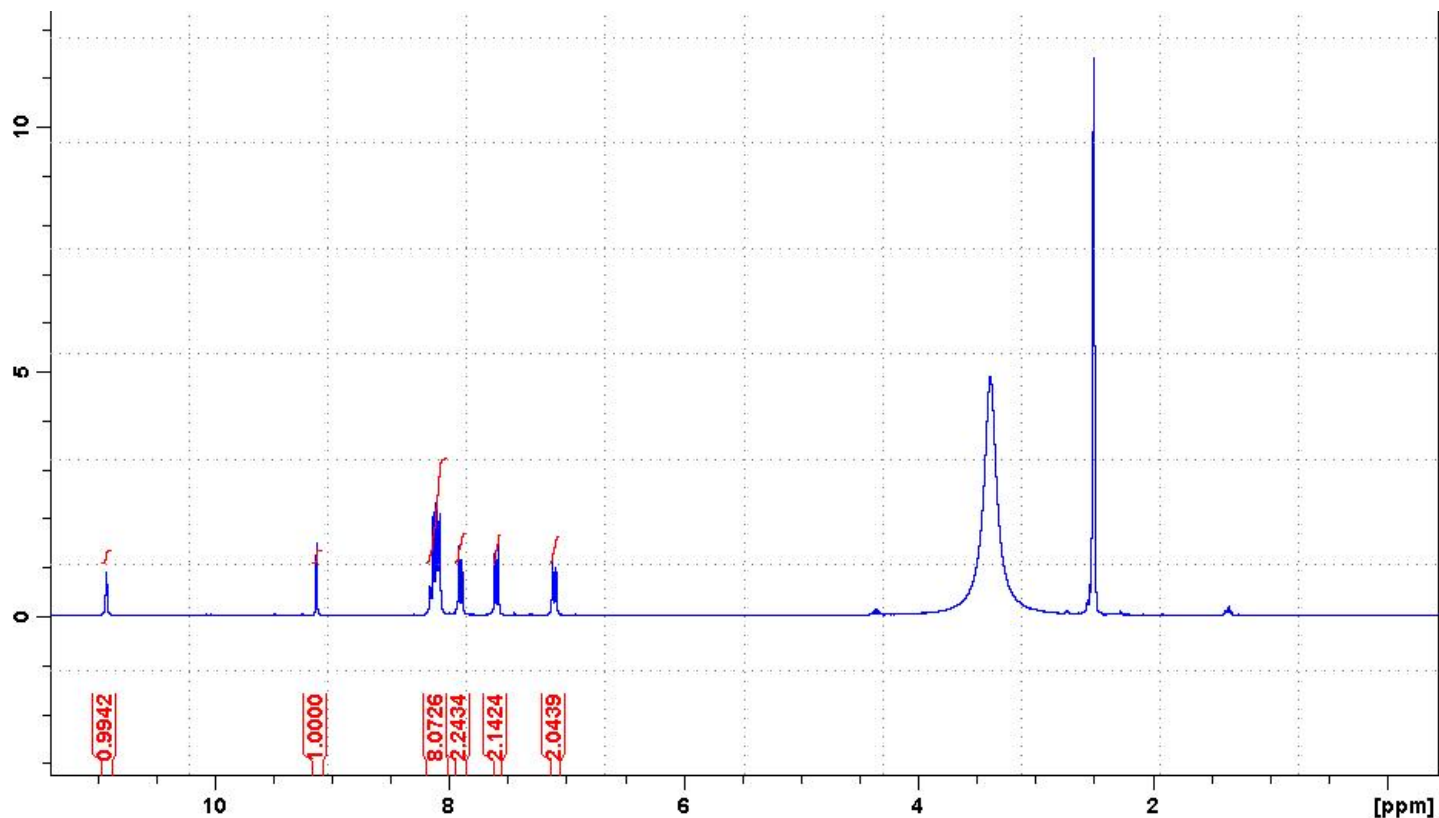



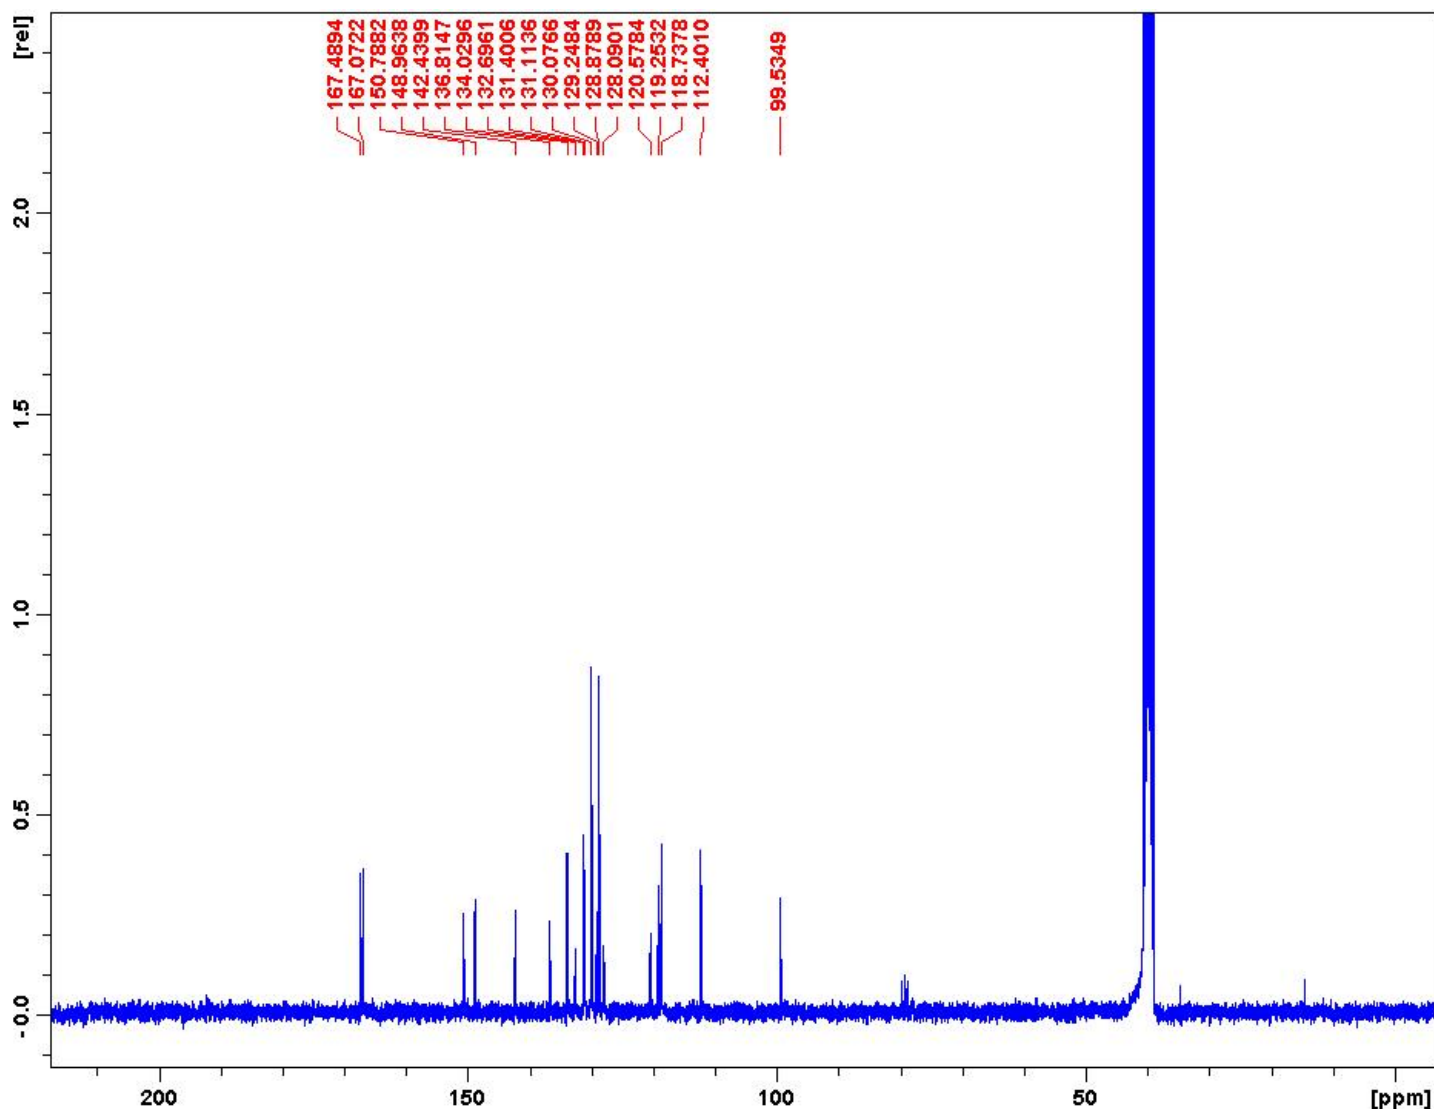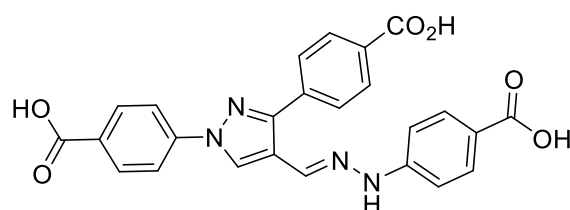

**4,4'-(4-((*E*)-[2-(4-carboxyphenyl)hydrazinylidene]methyl)-1*H*-pyrazole-1,3-diyl)dibenzoic acid (28)**

Brownish solid (347 mg, 74%). <sup>1</sup>H NMR, 300 MHz (DMSO-*d*<sub>6</sub>): δ 12.8 (br s, 3H), 10.77 (s, 1H), 9.12 (s, 1H), 8.17-8.07 (m, 8H), 7.91 (s, 1H), 7.79-7.77 (d, *J* = 8.58 Hz, 2H), 7.05 (d, *J* = 8.4 Hz, 2H); <sup>13</sup>C NMR (75 MHz, DMSO-*d*<sub>6</sub>) δ = 167.7, 167.5, 167.1, 150.6, 149.1, 142.4, 136.9, 131.5, 131.4, 131.0, 130.0, 129.9, 129.1, 129.0, 128.9, 120.5, 119.4, 118.6, 111.4.

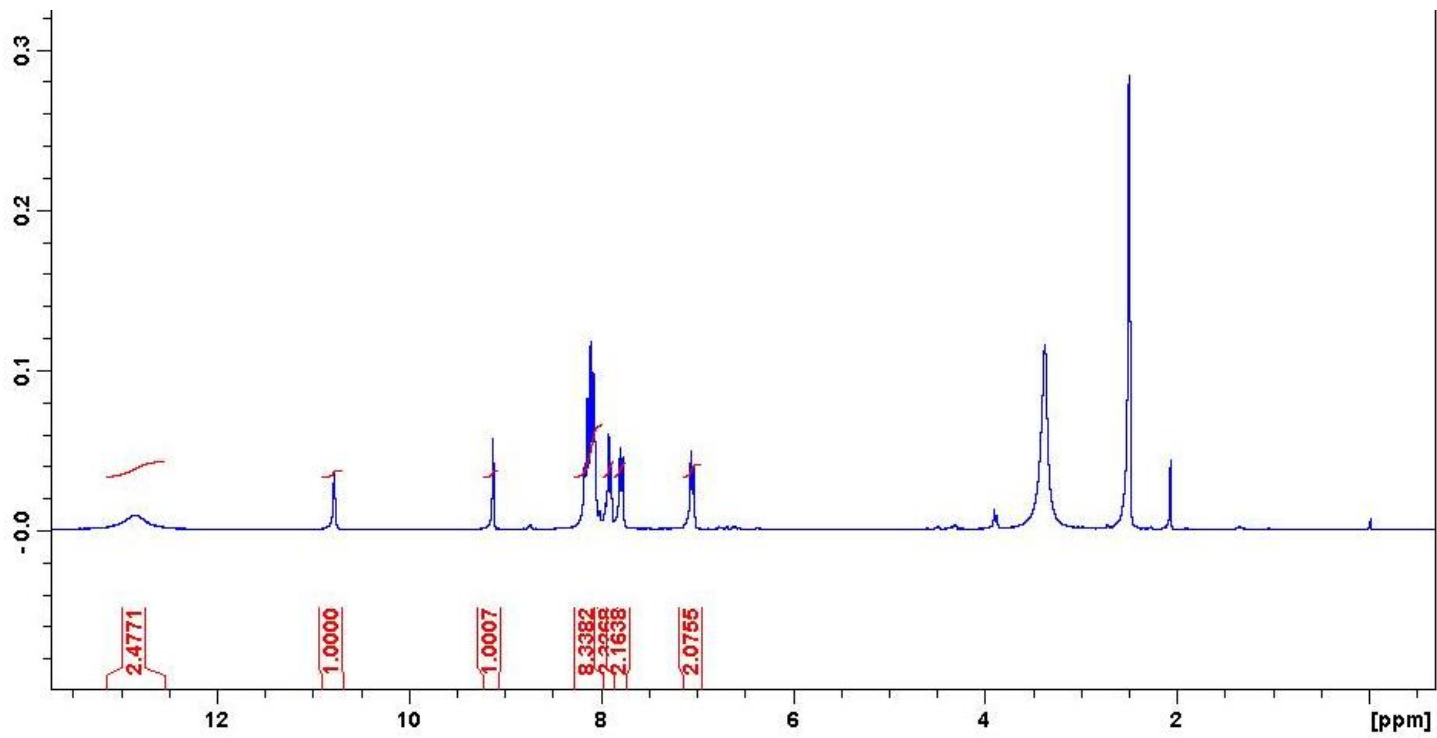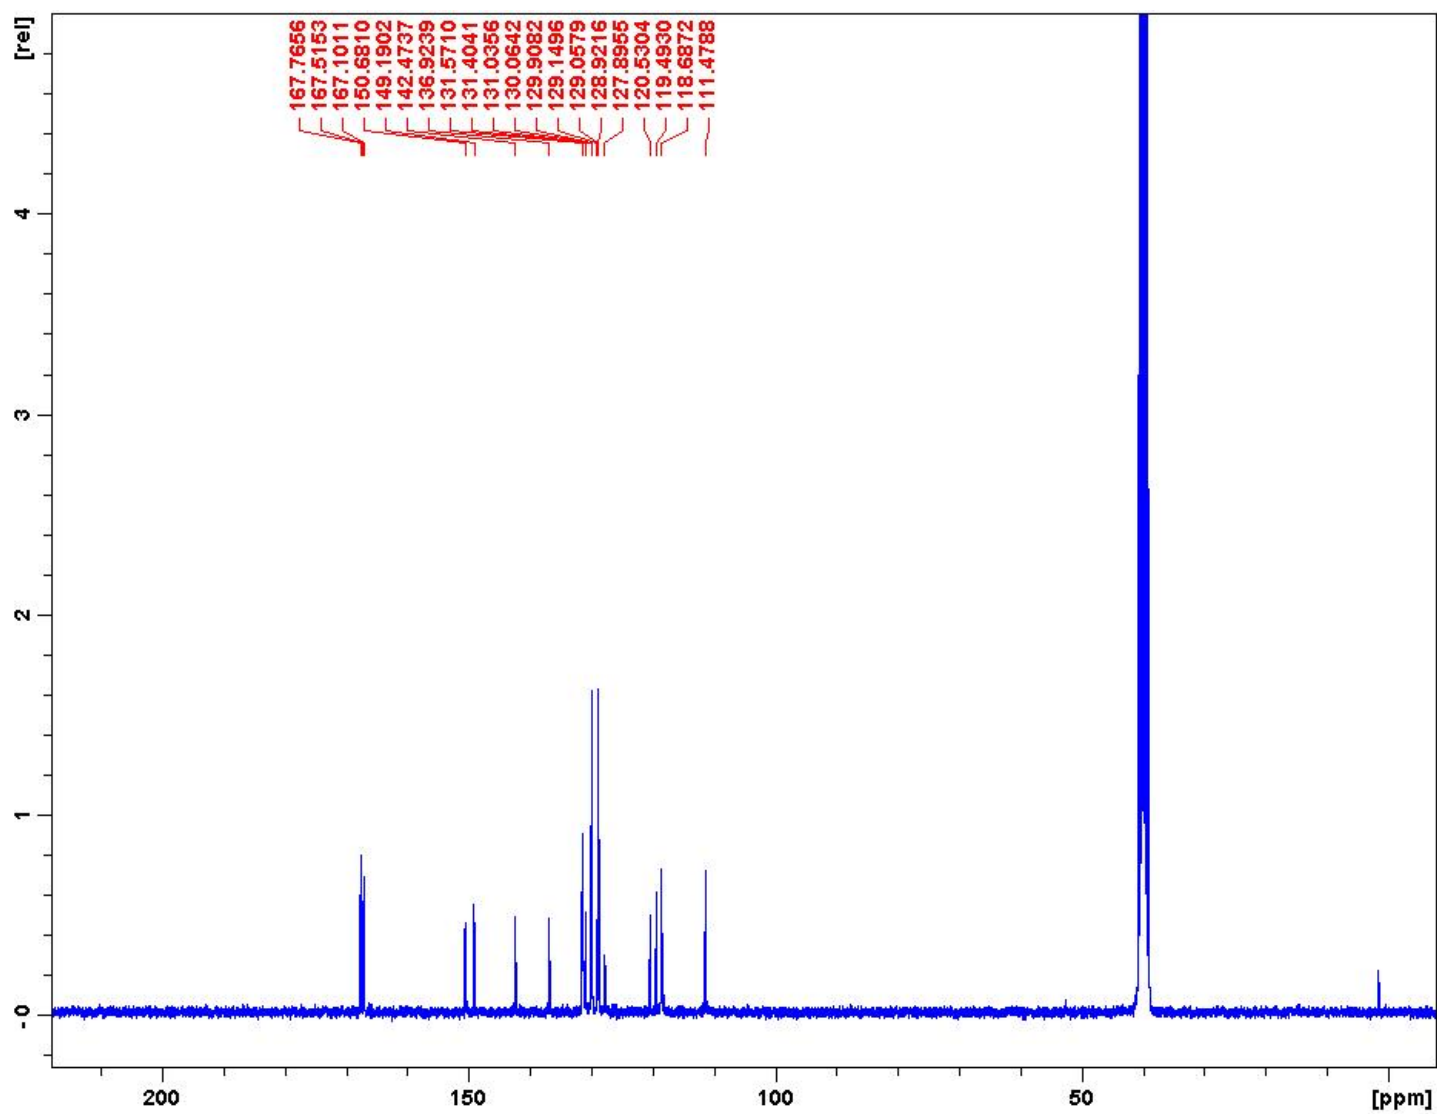

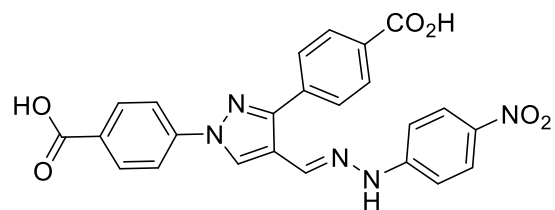

**4,4'-(4-{(E)-[2-(4-nitrophenyl)hydrazinylidene]methyl}-1H-pyrazole-1,3-diyl)dibenzoic acid (29)**

Reddish solid (372 mg, 79%).  $^1\text{H NMR}$ , 300 MHz (DMSO- $d_6$ ):  $\delta$  11.31 (s, 1H), 9.17 (s, 1H), 8.15-8.08 (m, 9H), 7.89 (d,  $J$  = 8.0 Hz, 2H), 7.10 (d,  $J$  = 8.4 Hz, 2H);  $^{13}\text{C NMR}$  (75 MHz, DMSO- $d_6$ )  $\delta$  = 167.7, 167.2, 151.0, 150.9, 142.2, 138.5, 136.5, 134.6, 131.6, 131.3, 130.0, 129.8, 128.8, 128.3, 126.5, 118.9, 118.7, 111.5.

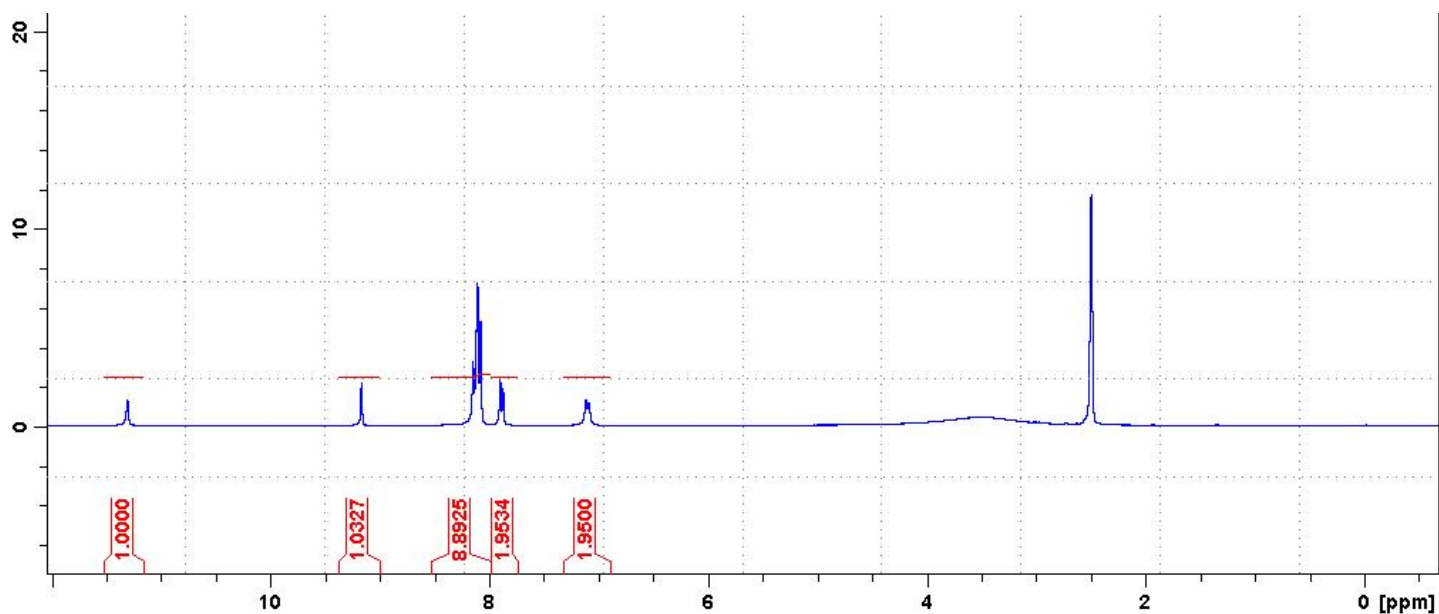

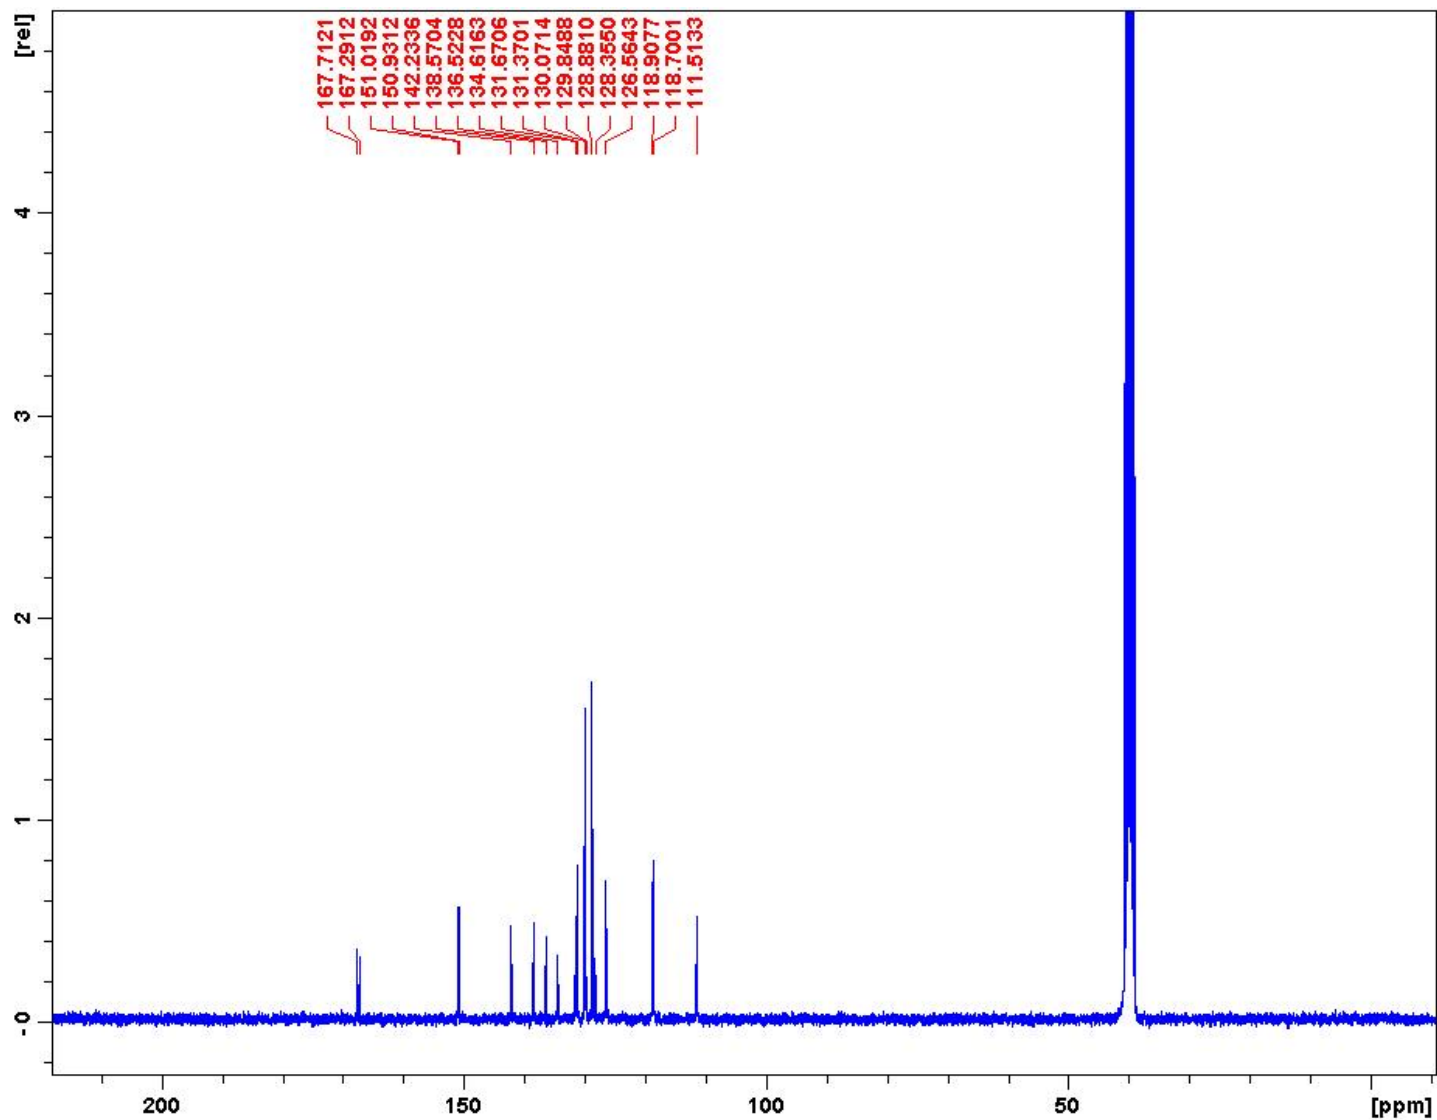

Supplement: antibiotics-09-00650-s001.pdf [file antibiotics-09-00650-s001.pdf]
